# Supplementary material
Source: PubMed Central journal article supplement (PMC10122508)

## Supplementary Information

# The Tethered Silanoxymercuration of Allylic Alcohols

Dr. Anand H. Shinde and Professor Shyam Sathyamoorthi\*

Department of Medicinal Chemistry, University of Kansas, Lawrence, Kansas 66047

### Contents

1. General Experimental Details
2. General Procedure for Synthesis of Alkenyl Silanol Substrates
3. Silanol Substrate Characterization Data
4. General Procedure for Alkenyl Silanol Cyclization
5. Silanediol Product Characterization
6. Scale-up Reaction
7. Derivatization Reactions
8. Crystallographic information for Compound 31 (CCDC 2032765)
9. NMR Spectra

## I. General Considerations:

All reagents were obtained commercially unless otherwise noted. Solvents were purified by passage under 10 psi N<sub>2</sub> through activated alumina columns. Infrared (IR) spectra were recorded on a Thermo Scientific™ Nicolet™ iS™5 FT-IR Spectrometer; data are reported in frequency of absorption (cm<sup>-1</sup>). NMR spectra were recorded on a Bruker Avance 400 operating at 400 and 100 MHz. <sup>1</sup>H NMR spectra were recorded at 400 MHz. Data are recorded as: chemical shift in ppm referenced internally using residue solvent peaks, multiplicity (s = singlet, d = doublet, t = triplet, q = quartet, m = multiplet or overlap of nonequivalent resonances), integration, coupling constant (Hz). <sup>13</sup>C NMR spectra were recorded at 100 MHz. Exact mass spectra were recorded using an electrospray ion source (ESI) either in positive mode or negative mode and with a time-of-flight (TOF) analyzer on a Waters LCT Premier™ mass spectrometer and are given in m/z. TLC was performed on pre-coated glass plates (Merck) and visualized either with a UV lamp (254 nm) or by dipping into a solution of KMnO<sub>4</sub>-K<sub>2</sub>CO<sub>3</sub> in water followed by heating. Flash chromatography was performed on silica gel (230-400 mesh). Reversed phase HPLC was performed on a Hamilton PRP-1.7 μm, 21.2 x 250 mm, C18 column. Hg(OTf)<sub>2</sub> was purchased from either Alfa Aesar or Strem Chemicals. Di-*tert*-butylsilyl Bis(trifluoromethanesulfonate) was purchased from either TCI America or from Sigma-Aldrich.

## II. General Procedure for Substrate Preparation

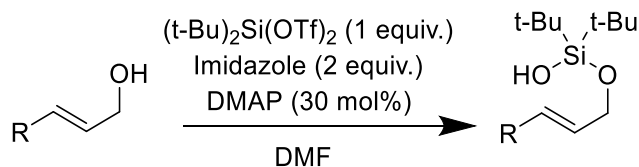

A 100 mL round bottom flask with a magnetic stir bar was charged with imidazole (0.273 g, 4 mmol, 2 equiv.) and 20 ml of DMF. After the flask was cooled to 0 °C, di-*tert*-butylsilyl bis(trifluoromethanesulfonate) (0.65 ml, 2 mmol, 1 equiv.) was added dropwise. Following addition, the flask was removed from the ice-water bath and the clear, colorless solution stirred for 30 minutes at room temperature. Following this time, the reaction flask was cooled to 0 °C and substrate (2 mmol, 1 equiv) was added dropwise followed by dimethylaminopyridine (0.073 g, 0.6 mmol, 0.3 equiv.). The reaction was warmed to room temperature over a period of 12 h. Following this time, the reaction mixture was diluted with ethyl acetate and transferred to a separatory funnel. The solution was washed once with 50 mL of 1M HCl (washing with 1M NaHCO<sub>3</sub> gives comparable results) and then with 200 mL of H<sub>2</sub>O. The organic layer was collected, dried with MgSO<sub>4</sub>, and concentrated under reduced pressure to yield a semi-solid residue. Chromatography on silica gel (0 to 100% ethyl acetate in hexanes) yielded purified product.

### III. Characterization of Substrates

Note: The HRMS data is not within the 10 ppm acceptable error for compounds: 1, 2, 4, 8, 12, 18-21, 43, 44. Due to the low molecular weight (<400) of these compounds, our lab often sees mass errors around 15 ppm.

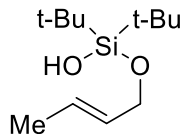

(*E*)-(but-2-en-1-yloxy)di-*tert*-butylsilanol

**Compound 1:** (Purified using a gradient of 0 to 100% EtOAc in hexanes, Colorless oil, 64% yield);  $^1\text{H}$  NMR (400 MHz,  $\text{CDCl}_3$ )  $\delta$  5.75 – 5.64 (m, 1H), 5.63 – 5.48 (m, 1H), 4.28 (dp,  $J = 5.1$ , 1.3 Hz, 2H), 1.70 (dq,  $J = 6.3$ , 1.4 Hz, 3H), 1.02 (s, 18H).  $^{13}\text{C}$  NMR (101 MHz,  $\text{CDCl}_3$ )  $\delta$  130.7, 126.0, 64.3, 27.6, 20.6, 17.8. IR 2850, 1464, 1090, 833  $\text{cm}^{-1}$ . HRMS calculated for  $\text{C}_{12}\text{H}_{25}\text{O}_2\text{Si}^-$  229.1629 Found 229.1666.

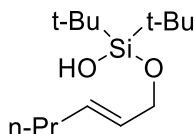

(*E*)-di-*tert*-butyl(hex-2-en-1-yloxy)silanol

**Compound 2:** (Purified using a gradient of 0 to 100% EtOAc in hexanes, Colorless oil, 48% yield);  $^1\text{H}$  NMR (400 MHz,  $\text{CDCl}_3$ )  $\delta$  5.66 (dtt,  $J = 15.6$ , 6.4, 1.3 Hz, 1H), 5.55 (dtt,  $J = 15.3$ , 5.3, 1.2 Hz, 1H), 4.28 (dq,  $J = 5.1$ , 1.2 Hz, 2H), 2.04 – 1.94 (m, 2H), 1.39 (dq,  $J = 14.8$ , 7.4 Hz, 2H), 1.01 (s, 18H), 0.89 (t,  $J = 7.4$  Hz, 3H).  $^{13}\text{C}$  NMR (101 MHz,  $\text{CDCl}_3$ )  $\delta$  131.3, 129.6, 64.3, 34.4, 27.6, 22.5, 20.6, 13.8. IR 2872, 1471, 1100, 788  $\text{cm}^{-1}$ . HRMS calculated for  $\text{C}_{14}\text{H}_{29}\text{O}_2\text{Si}^-$  257.1942 Found 257.1987.

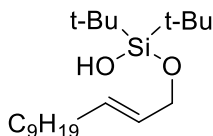

(*E*)-di-*tert*-butyl(dodec-2-en-1-yloxy)silanol

**Compound 3:** (Purified using a gradient of 0 to 100% EtOAc in hexanes, Colorless oil, 48% yield);  $^1\text{H}$  NMR (400 MHz,  $\text{CDCl}_3$ )  $\delta$  5.67 (dtt,  $J = 15.7$ , 6.4, 1.3 Hz, 1H), 5.60 – 5.49 (m, 1H), 4.29 (dq,  $J = 5.2$ , 1.2 Hz, 2H), 2.10 – 1.93 (m, 2H), 1.44 – 1.18 (m, 14H), 1.02 (s, 18H), 0.94 – 0.80 (m, 3H).  $^{13}\text{C}$  NMR (101 MHz,  $\text{CDCl}_3$ )  $\delta$  131.5, 129.2, 64.2, 32.2, 31.9, 29.6, 29.5, 29.3, 29.26, 29.2, 27.4, 22.7, 20.4, 14.1. IR 2931, 1471, 1100, 835  $\text{cm}^{-1}$ . HRMS calculated for  $\text{C}_{20}\text{H}_{41}\text{O}_2\text{Si}^-$  341.2881 Found 341.2889.

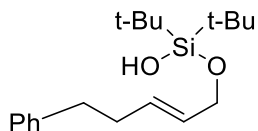

(*E*)-di-*tert*-butyl((5-phenylpent-2-en-1-yl)oxy)silanol

**Compound 4:** (Purified using a gradient of 0 to 100% EtOAc in hexanes, Colorless oil, 45% yield);  $^1\text{H NMR}$  (400 MHz,  $\text{CDCl}_3$ )  $\delta$  7.39 – 7.28 (m, 2H), 7.28 – 7.09 (m, 3H), 5.85 – 5.75 (m, 1H), 5.74 – 5.56 (m, 1H), 4.36 (dt,  $J = 5.1, 1.2$  Hz, 2H), 2.77 (dd,  $J = 8.9, 6.7$  Hz, 2H), 2.51 – 2.37 (m, 2H), 1.09 (d,  $J = 1.0$  Hz, 18H).  $^{13}\text{C NMR}$  (101 MHz,  $\text{CDCl}_3$ )  $\delta$  141.8, 130.08, 130.02, 128.4, 128.3, 125.8, 64.0, 35.7, 33.9, 27.4, 20.5. IR 2937, 1465, 1095, 835  $\text{cm}^{-1}$ . HRMS calculated for  $\text{C}_{19}\text{H}_{31}\text{O}_2\text{Si}^-$  319.2099 Found 319.2033.

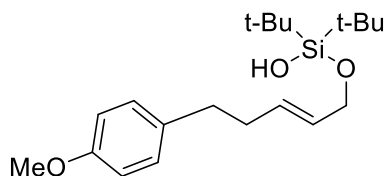

(*E*)-di-*tert*-butyl((5-(4-methoxyphenyl)pent-2-en-1-yl)oxy)silanol

**Compound 5:** (Purified using a gradient of 0 to 100% EtOAc in hexanes, Colorless oil, 54% yield);  $^1\text{H NMR}$  (400 MHz,  $\text{CDCl}_3$ )  $\delta$  7.15 – 7.02 (m, 2H), 6.88 – 6.72 (m, 2H), 5.71 (dtd,  $J = 15.8, 6.4, 1.4$  Hz, 1H), 5.65 – 5.51 (m, 1H), 4.29 (dq,  $J = 5.3, 1.3$  Hz, 2H), 3.79 (s, 3H), 2.65 (dd,  $J = 8.8, 6.6$  Hz, 2H), 2.43 – 2.21 (m, 2H), 1.02 (s, 18H).  $^{13}\text{C NMR}$  (101 MHz,  $\text{CDCl}_3$ )  $\delta$  157.9, 134.1, 130.3, 130.0, 129.4, 113.8, 64.1, 55.3, 34.8, 34.3, 27.5, 20.6. IR 2937, 1512, 1247, 829  $\text{cm}^{-1}$ . HRMS calculated for  $\text{C}_{20}\text{H}_{33}\text{O}_3\text{Si}^-$  349.2204 Found 349.2226.

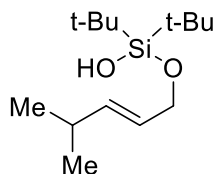

(*E*)-di-*tert*-butyl((4-methylpent-2-en-1-yl)oxy)silanol

**Compound 6:** (Purified using a gradient of 0 to 100% EtOAc in hexanes, Colorless oil, 50% yield);  $^1\text{H NMR}$  (400 MHz,  $\text{CDCl}_3$ )  $\delta$  5.64 (dtd,  $J = 15.4, 6.3, 1.4$  Hz, 1H), 5.51 (dtd,  $J = 15.4, 5.3, 1.2$  Hz, 1H), 4.29 (dt,  $J = 5.4, 1.2$  Hz, 2H), 2.37 – 2.21 (m, 1H), 1.02 (s, 18H), 0.99 (d,  $J = 6.7$  Hz, 6H).  $^{13}\text{C NMR}$  (101 MHz,  $\text{CDCl}_3$ )  $\delta$  138.4, 126.5, 64.4, 30.7, 27.5, 22.4, 20.6. IR 2943, 1471, 1044, 759  $\text{cm}^{-1}$ . HRMS calculated for  $\text{C}_{14}\text{H}_{29}\text{O}_2\text{Si}^-$  257.1942 Found 257.1964.

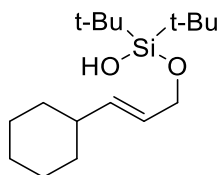

(*E*)-di-*tert*-butyl((3-cyclohexylallyl)oxy)silanol

**Compound 7:** (Purified using a gradient of 0 to 100% EtOAc in hexanes, Colorless oil, 52% yield);  $^1\text{H NMR}$  (400 MHz,  $\text{CDCl}_3$ )  $\delta$  5.65 (dtd,  $J = 15.4, 6.3, 1.3$  Hz, 1H), 5.54 (dtd,  $J = 15.5, 5.3, 1.1$  Hz, 1H), 4.32 (dt,  $J = 5.2, 1.1$  Hz, 2H), 1.80 – 1.61 (m, 5H), 1.36 – 1.08 (m, 6H), 1.05 (s, 18H).



$^{13}\text{C}$  NMR (101 MHz,  $\text{CDCl}_3$ )  $\delta$  137.2, 126.8, 64.3, 40.2, 32.8, 27.4, 26.1, 26.0, 20.4. IR 2913, 1472, 1065, 829  $\text{cm}^{-1}$ . HRMS calculated for  $\text{C}_{17}\text{H}_{33}\text{O}_2\text{Si}^-$  297.2255 Found 297.2247.

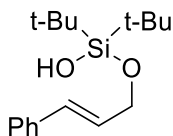

di-*tert*-butyl(cinnamyloxy)silanol

**Compound 8:** (Purified using a gradient of 0 to 100% EtOAc in hexanes, Colorless oil, 59% yield);  $^1\text{H}$  NMR (400 MHz,  $\text{CDCl}_3$ )  $\delta$  7.43 – 7.35 (m, 2H), 7.31 (ddd,  $J = 7.8, 6.7, 1.2$  Hz, 2H), 7.28 – 7.19 (m, 1H), 6.64 (dt,  $J = 15.9, 1.9$  Hz, 1H), 6.32 (dt,  $J = 15.8, 5.1$  Hz, 1H), 4.53 (dd,  $J = 5.1, 1.8$  Hz, 2H), 1.06 (s, 18H).  $^{13}\text{C}$  NMR (101 MHz,  $\text{CDCl}_3$ )  $\delta$  137.2, 129.5, 129.3, 128.6, 127.4, 126.5, 64.1, 27.6, 20.7. IR 2943, 1465, 1112, 829  $\text{cm}^{-1}$ . HRMS calculated for  $\text{C}_{17}\text{H}_{27}\text{O}_2\text{Si}^-$  291.1786 Found 291.1843.

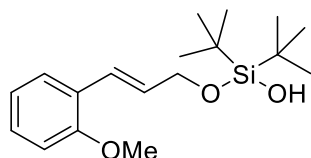

(*E*)-di-*tert*-butyl((3-(2-methoxyphenyl)allyl)oxy)silanol

**Compound 9:** (Purified using a gradient of 0 to 100% EtOAc in hexanes, Colorless oil, 61% yield);  $^1\text{H}$  NMR (400 MHz,  $\text{CDCl}_3$ )  $\delta$  7.43 (dd,  $J = 7.6, 1.7$  Hz, 1H), 7.22 (ddd,  $J = 8.2, 7.4, 1.8$  Hz, 1H), 7.00 – 6.82 (m, 3H), 6.33 (dt,  $J = 16.0, 5.2$  Hz, 1H), 4.55 (dd,  $J = 5.2, 1.8$  Hz, 2H), 3.84 (s, 3H), 1.07 (s, 18H).  $^{13}\text{C}$  NMR (101 MHz,  $\text{CDCl}_3$ )  $\delta$  156.7, 129.9, 128.3, 126.9, 126.2, 124.4, 120.6, 110.9, 64.5, 55.4, 27.5, 20.5. IR 2931, 1465, 1059, 835  $\text{cm}^{-1}$ . HRMS calcd for  $\text{C}_{18}\text{H}_{30}\text{NaO}_3\text{Si}^+$  345.1856 Found 345.1889.

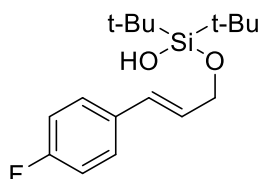

(*E*)-di-*tert*-butyl((3-(4-fluorophenyl)allyl)oxy)silanol

**Compound 10:** (Purified using a gradient of 0 to 100% EtOAc in hexanes, Colorless oil, 66% yield);  $^1\text{H}$  NMR (400 MHz,  $\text{CDCl}_3$ )  $\delta$  1.1 (s, 18H), 1.8 (s, 1H), 4.5 (dd,  $J = 5.1, 1.8$  Hz, 2H), 6.2 (dt,  $J = 15.8, 5.0$  Hz, 1H), 6.6 (dt,  $J = 15.8, 1.9$  Hz, 1H), 6.9 – 7.0 (m, 2H), 7.3 – 7.4 (m, 2H);  $^{13}\text{C}$  NMR (101 MHz,  $\text{CDCl}_3$ )  $\delta$   $^{13}\text{C}$  NMR (101 MHz,  $\text{CDCl}_3$ )  $\delta$  162.2 (d,  $J = 246.3$  Hz), 133.2 (d,  $J = 3.2$  Hz), 128.9 (d,  $J = 2.2$  Hz), 128.2, 127.8 (d,  $J = 8.0$  Hz), 115.4 (d,  $J = 21.5$  Hz), 63.9, 27.4, 20.5. IR 3497, 2933, 2858, 1127, 825, 645  $\text{cm}^{-1}$ ; HRMS calculated for  $\text{C}_{17}\text{H}_{26}\text{FO}_2\text{Si}^-$  309.1692 Found 309.1709.

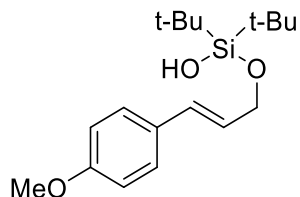

(*E*)-di-*tert*-butyl((3-(4-methoxyphenyl)allyl)oxy)silanol

**Compound 11:** (Purified using a gradient of 0 to 100% EtOAc in hexanes, White solid, 55% yield);  $^1\text{H NMR}$  (400 MHz,  $\text{CDCl}_3$ )  $\delta$  7.38 – 7.28 (m, 2H), 6.89 – 6.79 (m, 2H), 6.57 (dt,  $J = 15.8$ , 1.7 Hz, 1H), 6.18 (dt,  $J = 15.8$ , 5.3 Hz, 1H), 4.51 (dd,  $J = 5.3$ , 1.7 Hz, 2H), 3.81 (s, 3H), 1.06 (s, 18H).  $^{13}\text{C NMR}$  (101 MHz,  $\text{CDCl}_3$ )  $\delta$  159.2, 130.0, 129.1, 127.6, 127.1, 114.1, 64.3, 55.4, 27.6, 20.6. IR 2937, 1253, 1100, 971  $\text{cm}^{-1}$ . HRMS calculated for  $\text{C}_{18}\text{H}_{30}\text{NaO}_3\text{Si}^+$  345.1856 Found 345.1830.

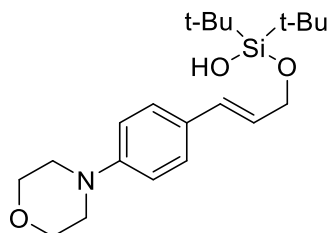

(*E*)-di-*tert*-butyl((3-(4-morpholinophenyl)allyl)oxy)silanol

**Compound 12:** (Purified using a gradient of 0 to 100% EtOAc in hexanes, Light yellow solid, 39% yield);  $^1\text{H NMR}$  (400 MHz,  $\text{CDCl}_3$ )  $\delta$  1.1 (s, 18H), 3.0 – 3.2 (m, 4H), 3.8 – 3.9 (m, 4H), 4.5 (dd,  $J = 5.4$ , 1.7 Hz, 2H), 6.2 (dt,  $J = 15.8$ , 5.3 Hz, 1H), 6.5 (dt,  $J = 15.7$ , 1.7 Hz, 1H), 6.8 – 6.9 (m, 2H), 7.3 – 7.3 (m, 2H);  $^{13}\text{C NMR}$  (101 MHz,  $\text{CDCl}_3$ )  $\delta$  20.6, 27.5, 49.2, 64.3, 66.9, 115.6, 126.6, 127.3, 129.0, 129.2, 150.5; IR 3445, 2932, 2855, 1450, 645  $\text{cm}^{-1}$ ; HRMS calculated for  $\text{C}_{21}\text{H}_{36}\text{NO}_3\text{Si}^+$  378.2459 Found 378.2408.

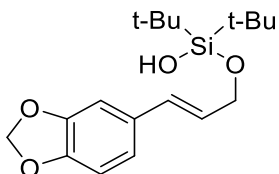

(*E*)-((3-(benzo[*d*][1,3]dioxol-5-yl)allyl)oxy)di-*tert*-butylsilanol

**Compound 13:** (Purified using a gradient of 0 to 100% EtOAc in hexanes, Colorless solid, 68% yield);  $^1\text{H NMR}$  (400 MHz,  $\text{CDCl}_3$ )  $\delta$  1.1 (s, 18H), 1.9 (s, 1H), 4.5 (dd,  $J = 5.2$ , 1.7 Hz, 2H), 5.9 (s, 2H), 6.1 (dt,  $J = 15.7$ , 5.2 Hz, 1H), 6.5 (dt,  $J = 15.8$ , 1.8 Hz, 1H), 6.7 (d,  $J = 8.0$  Hz, 1H), 6.8 (dd,  $J = 8.0$ , 1.7 Hz, 1H), 6.9 (d,  $J = 1.6$  Hz, 1H);  $^{13}\text{C NMR}$  (101 MHz,  $\text{CDCl}_3$ )  $\delta$  20.5, 27.5, 64.0, 101.0, 105.8, 108.3, 120.9, 127.5, 129.2, 131.6, 147.0, 148.0; IR 3484, 2936, 2855, 1440, 1275, 750  $\text{cm}^{-1}$ ; HRMS calculated for  $\text{C}_{18}\text{H}_{27}\text{O}_4\text{Si}^-$  335.1684 Found 335.1678.

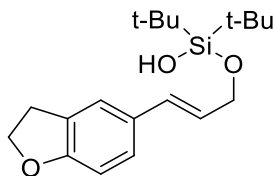

(*E*)-di-*tert*-butyl((3-(2,3-dihydrobenzofuran-5-yl)allyl)oxy)silanol

**Compound 14:** (Purified using a gradient of 0 to 100% EtOAc in hexanes, Pale yellow oil, 56% yield);  $^1\text{H}$  NMR (400 MHz,  $\text{CDCl}_3$ )  $\delta$  1.1 (s, 18H), 2.0 (s, 1H), 3.2 (t,  $J = 8.7$  Hz, 2H), 4.5 (dd,  $J = 5.4, 1.7$  Hz, 2H), 4.6 (t,  $J = 8.7$  Hz, 2H), 6.1 (dt,  $J = 15.8, 5.3$  Hz, 1H), 6.5 (dt,  $J = 15.8, 1.7$  Hz, 1H), 6.7 (d,  $J = 8.2$  Hz, 1H), 7.1 (dd,  $J = 8.3, 1.9$  Hz, 1H), 7.2 – 7.3 (m, 1H);  $^{13}\text{C}$  NMR (101 MHz,  $\text{CDCl}_3$ )  $\delta$  20.5, 27.5, 29.6, 64.3, 71.4, 109.2, 122.6, 126.4, 126.8, 127.4, 129.5, 129.9, 159.7; IR 3456, 2932, 2857, 1491, 825, 646  $\text{cm}^{-1}$ ; HRMS calculated for  $\text{C}_{19}\text{H}_{29}\text{O}_3\text{Si}^-$  333.1891 Found 333.1906.

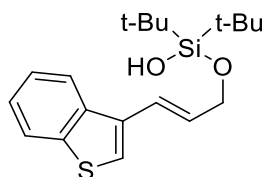

(*E*)-((3-(benzo[*b*]thiophen-3-yl)allyl)oxy)di-*tert*-butylsilanol

**Compound 15:** (Purified using a gradient of 0 to 100% EtOAc in hexanes, Pale yellow oil, 51% yield);  $^1\text{H}$  NMR (400 MHz,  $\text{CDCl}_3$ )  $\delta$  1.1 (s, 18H), 2.0 (s, 1H), 4.6 (dd,  $J = 4.9, 1.9$  Hz, 2H), 6.4 (dt,  $J = 15.9, 4.9$  Hz, 1H), 6.9 (dtd,  $J = 15.8, 1.9, 0.8$  Hz, 1H), 7.3 – 7.5 (m, 3H), 7.8 – 8.0 (m, 2H).  $^{13}\text{C}$  NMR (101 MHz,  $\text{CDCl}_3$ )  $\delta$  20.3, 27.2, 63.7, 121.2, 121.6, 122.5, 123.9, 124.1, 130.6, 133.5, 137.5, 140.1; IR 3428, 2932, 2857, 1471, 1114, 759, 647  $\text{cm}^{-1}$ ; HRMS calculated for  $\text{C}_{19}\text{H}_{27}\text{O}_2\text{SSi}^-$  347.1507 Found 347.1509.

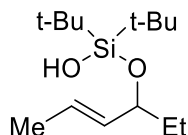

(*E*)-di-*tert*-butyl(hex-4-en-3-yloxy)silanol

**Compound 16:** Note: during synthesis, heated to 50 °C for 16 hours; (Purified using a gradient of 0 to 100% EtOAc in hexanes, Colorless oil, 38% yield);  $^1\text{H}$  NMR (400 MHz,  $\text{CDCl}_3$ )  $\delta$  5.58 (dq,  $J = 15.3, 6.3, 0.8$  Hz, 1H), 5.45 (ddq,  $J = 15.3, 7.3, 1.4$  Hz, 1H), 4.30 – 4.16 (m, 1H), 1.68 (ddd,  $J = 6.3, 1.5, 0.5$  Hz, 3H), 1.64 – 1.41 (m, 2H), 1.02 (s, 9H), 0.99 (s, 9H), 0.86 (t,  $J = 7.4$  Hz, 3H).  $^{13}\text{C}$  NMR (101 MHz,  $\text{CDCl}_3$ )  $\delta$  134.88, 125.38, 75.31, 31.23, 27.47, 27.45, 20.57, 20.32, 17.53, 9.35. IR 2925, 1472, 1047, 823  $\text{cm}^{-1}$ . HRMS calculated for  $\text{C}_{14}\text{H}_{29}\text{O}_2\text{Si}^-$  257.1942 Found 257.1964.

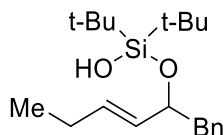

(*E*)-di-*tert*-butyl((1-phenylhex-3-en-2-yl)oxy)silanol

**Compound 17:** (Purified using a gradient of 0 to 100% EtOAc in hexanes, Pale yellow oil, 30% yield);  $^1\text{H}$  NMR (400 MHz,  $\text{CDCl}_3$ )  $\delta$  0.9 (s, 9H), 1.0 (m, 12H), 2.0 (qdd,  $J = 7.9, 6.6, 1.4$  Hz, 2H), 2.8 (d,  $J = 6.5$  Hz, 2H), 4.4 – 4.6 (m, 1H), 5.5 (ddt,  $J = 15.5, 6.9, 1.4$  Hz, 1H), 5.6 (dtd,  $J = 15.4, 6.2, 0.8$  Hz, 1H), 7.2 (ddd,  $J = 9.2, 3.6, 2.4$  Hz, 3H), 7.2 – 7.3 (m, 2H);  $^{13}\text{C}$  NMR (101 MHz,  $\text{CDCl}_3$ )  $\delta$  13.9, 20.7, 20.8, 25.4, 27.8, 27.8, 45.8, 75.7, 126.5, 128.4, 130.3, 132.7, 132.9, 139.2; IR 3640, 2933, 2857, 1472, 825, 697  $\text{cm}^{-1}$ ; HRMS calculated for  $\text{C}_{20}\text{H}_{33}\text{O}_2\text{Si}^-$  333.2255 Found 333.2265.

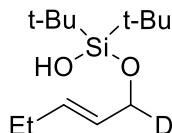

(*E*)-di-*tert*-butyl((pent-2-en-1-yl-1-*d*)oxy)silanol

**Compound 18:** (Purified using a gradient of 0 to 100% EtOAc in hexanes, Colorless oil, 54% yield);  $^1\text{H}$  NMR (400 MHz,  $\text{CDCl}_3$ )  $\delta$  5.74 (dtd,  $J = 15.3, 6.3, 1.5$  Hz, 1H), 5.65 – 5.52 (m, 1H), 4.30 (dq,  $J = 5.3, 1.6$  Hz, 1H), 2.15 – 2.00 (m, 2H), 1.05 (s, 18H), 1.02 (t,  $J = 7.5$  Hz, 3H).  $^{13}\text{C}$  NMR (101 MHz,  $\text{CDCl}_3$ )  $\delta$  132.8, 128.2, 64.9 – 63.0 (t,  $J = 22$  Hz, 1C), 27.4, 25.1, 20.4, 13.4. IR 2925, 1477, 1065, 829  $\text{cm}^{-1}$ . HRMS calculated for  $\text{C}_{13}\text{H}_{26}\text{DO}_2\text{Si}^-$  244.1849 Found 244.1880.

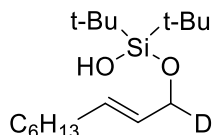

(*E*)-di-*tert*-butyl((non-2-en-1-yl-1-*d*)oxy)silanol

**Compound 19:** (Purified using a gradient of 0 to 100% EtOAc in hexanes, Colorless oil, 53% yield);  $^1\text{H}$  NMR (400 MHz,  $\text{CDCl}_3$ )  $\delta$  5.70 (dtd,  $J = 15.3, 6.5, 1.3$  Hz, 1H), 5.58 (ddt,  $J = 15.3, 5.3, 1.2$  Hz, 1H), 4.30 (tq,  $J = 4.4, 1.4$  Hz, 1H), 2.08 – 2.01 (m, 2H), 1.49 – 1.24 (m, 8H), 1.05 (s, 18H), 0.91 (m, 3H).  $^{13}\text{C}$  NMR (101 MHz,  $\text{CDCl}_3$ )  $\delta$  131.5, 129.1, 64.9 – 62.1 (t,  $J = 21$  Hz, 1C), 32.1, 31.7, 29.2, 28.8, 27.4, 22.6, 20.4, 14.0. IR 2919, 1465, 1100, 829  $\text{cm}^{-1}$ . HRMS calculated for  $\text{C}_{17}\text{H}_{34}\text{DO}_2\text{Si}^-$  300.2475 Found 300.2507.

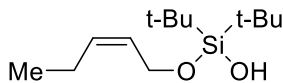

(*Z*)-di-*tert*-butyl(pent-2-en-1-yloxy)silanol

**Compound 20:** (Purified using a gradient of 0 to 100% EtOAc in hexanes, Colorless oil, 50% yield);  $^1\text{H}$  NMR (400 MHz,  $\text{CDCl}_3$ )  $\delta$  5.55 (dtd,  $J = 10.9, 5.9, 1.3$  Hz, 1H), 5.51 – 5.40 (m, 1H), 4.53 – 4.36 (m, 2H), 2.15 – 1.99 (m, 2H), 1.05 (s, 18H), 1.00 (t,  $J = 7.5$  Hz, 3H). IR 2937, 1471,

1094, 823  $\text{cm}^{-1}$ .  $^{13}\text{C}$  NMR (101 MHz,  $\text{CDCl}_3$ )  $\delta$  132.5, 128.9, 59.5, 27.4, 20.8, 20.4, 14.2. HRMS calculated for  $\text{C}_{17}\text{H}_{27}\text{O}_2\text{Si}^-$  243.1786 Found 243.1841.

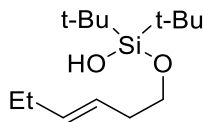

(*E*)-di-*tert*-butyl(hex-3-en-1-yloxy)silanol

**Compound 21:** (Purified using a gradient of 0 to 100% EtOAc in hexanes, Colorless oil, 40% yield);  $^1\text{H}$  NMR (400 MHz,  $\text{CDCl}_3$ )  $\delta$  5.57 (dt,  $J = 14.6, 5.9, 1.2$  Hz, 1H), 5.50 – 5.28 (m, 1H), 3.83 (t,  $J = 6.7$  Hz, 2H), 2.27 (qq,  $J = 6.7, 1.1$  Hz, 2H), 2.04 (ddtd,  $J = 8.6, 7.3, 6.1, 1.1$  Hz, 2H), 1.12 – 0.91 (m, 21H).  $^{13}\text{C}$  NMR (101 MHz,  $\text{CDCl}_3$ )  $\delta$  134.4, 125.7, 63.7, 36.5, 27.6, 25.8, 20.6, 13.9. IR 2943, 1471, 1094, 823  $\text{cm}^{-1}$ . HRMS calculated for  $\text{C}_{14}\text{H}_{31}\text{O}_2\text{Si}^+$  259.2088 Found 259.2059.

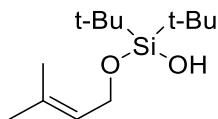

di-*tert*-butyl((3-methylbut-2-en-1-yl)oxy)silanol

**Compound 43:** (Purified using a gradient of 0 to 100% EtOAc in hexanes, Colorless oil, 48% yield);  $^1\text{H}$  NMR (400 MHz,  $\text{CDCl}_3$ )  $\delta$  5.34 (ddq,  $J = 7.8, 5.0, 1.4$  Hz, 1H), 4.34 (dp,  $J = 6.5, 0.9$  Hz, 2H), 2.01 (s, 1H), 1.72 (q,  $J = 1.4$  Hz, 3H), 1.64 (d,  $J = 1.3$  Hz, 3H), 1.02 (s, 18H).  $^{13}\text{C}$  NMR (101 MHz,  $\text{CDCl}_3$ )  $\delta$  133.7, 124.7, 60.6, 27.5, 25.7, 20.6, 18.1. IR 2937, 1471, 1100, 651  $\text{cm}^{-1}$ . HRMS calculated for  $\text{C}_{13}\text{H}_{27}\text{O}_2\text{Si}^-$  243.1786 Found 243.1840.

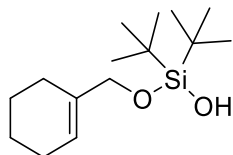

di-*tert*-butyl(cyclohex-1-en-1-ylmethoxy)silanol

**Compound 44:** (Purified using a gradient of 0 to 100% EtOAc in hexanes, Colorless oil, 41% yield);  $^1\text{H}$  NMR (400 MHz,  $\text{CDCl}_3$ )  $\delta$  5.68 (td,  $J = 3.6, 1.8$  Hz, 1H), 4.17 (dtd,  $J = 2.6, 1.8, 0.9$  Hz, 2H), 2.04 – 1.93 (m, 4H), 1.68 – 1.56 (m, 4H), 1.03 (s, 18H).  $^{13}\text{C}$  NMR (101 MHz,  $\text{CDCl}_3$ )  $\delta$  137.5, 121.5, 67.9, 27.6, 25.6, 25.0, 22.8, 22.7, 20.7. IR 2849, 1477, 1071, 829  $\text{cm}^{-1}$ . HRMS calculated for  $\text{C}_{15}\text{H}_{29}\text{O}_2\text{Si}^-$  269.1942 Found 269.1982.

#### IV. General Procedure for Cyclization of Alkenyl Silanols into Silanediol Synthons

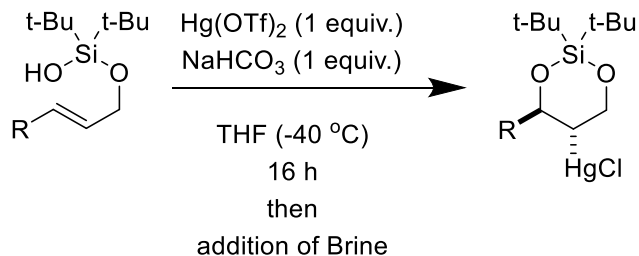

A 5 mL microwave vial was charged with NaHCO<sub>3</sub> (16.8 mg, 0.2 mmol, 1 equiv.) and Hg(OTf)<sub>2</sub> (100 mg, 0.2 mmol, 1 equiv.). 1 mL of anhydrous THF was added after which the reaction flask was immersed in a cooling bath set to -40 °C. Silanediol substrate (0.2 mmol, 1 equiv.) in 1 mL of THF was added dropwise to the cooled reaction flask after which the microwave vial was sealed. After 16 h at -40 °C (temperature maintained by a Brinkmann Lauda IC-6 immersion cooler chiller), 2 mL of saturated aqueous NaCl (brine) solution was added. The vial was removed from the cooling bath and allowed to warm to room temperature. The reaction mixture was diluted with ethyl acetate and transferred to a separatory funnel. After washing with H<sub>2</sub>O, the organic layer was collected, dried with MgSO<sub>4</sub>, and concentrated under reduced pressure. Chromatography on silica gel (0 to 100% ethyl acetate in hexanes) yielded purified product.

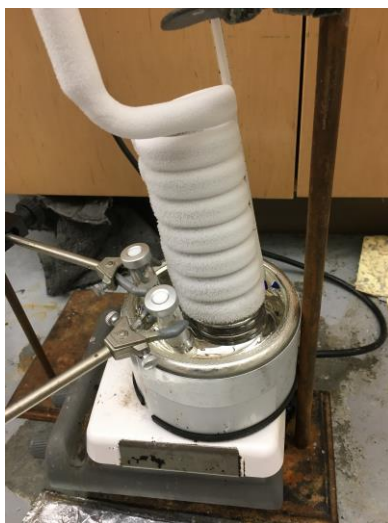

## V. Characterization of Products

*Note 1: In all cases, relative stereochemistry is shown.*

*Note 2: During ESI-MS, in almost all cases, we observed cleavage of the carbon mercury bond into a carbocation fragment. A representative mass spectrum of Compound 31 is given at the end of this section illustrating this phenomenon. A crystal structure of Compound 31 has been obtained, unequivocally establishing its structural assignment. This data is in Section VIII.*

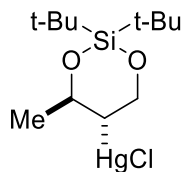

2,2-di-*tert*-butyl-4-methyl-1,3,2-dioxasilinan-5-yl)mercury(II) chloride

**Compound 22:** (Purified using a gradient of 0 to 100% EtOAc in hexanes, White solid, 70% yield);  $^1\text{H}$  NMR (400 MHz,  $\text{CDCl}_3$ )  $\delta$  4.41 (dq,  $J = 11.1, 6.1$  Hz, 1H), 4.32 (dd,  $J = 12.8, 11.1$  Hz, 1H), 4.16 (dd,  $J = 11.2, 4.0$  Hz, 1H), 2.90 (ddd,  $J = 12.7, 11.0, 4.1$  Hz, 1H), 1.30 (d,  $J = 6.1$  Hz, 3H), 0.94 (d,  $J = 18.9$  Hz, 18H).  $^{13}\text{C}$  NMR (101 MHz,  $\text{CDCl}_3$ )  $\delta$  72.8, 66.9, 61.1, 27.7, 27.4, 27.0, 22.8, 19.6. IR 2937, 1477, 1047, 825  $\text{cm}^{-1}$ .

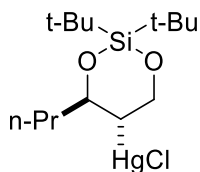

2,2-di-*tert*-butyl-4-propyl-1,3,2-dioxasilinan-5-yl)mercury(II) chloride

**Compound 23:** (Purified using a gradient of 0 to 100% EtOAc in hexanes, White solid, 63% yield);  $^1\text{H}$  NMR (400 MHz,  $\text{CDCl}_3$ )  $\delta$  4.39 (dd,  $J = 12.7, 11.1$  Hz, 1H), 4.31 (td,  $J = 6.5, 3.3$  Hz, 1H), 4.28 – 4.20 (m, 1H), 2.99 (ddd,  $J = 12.7, 11.1, 4.1$  Hz, 1H), 1.64 – 1.52 (m, 4H), 1.03 (s, 9H), 0.98 (s, 9H), 0.94 (d,  $J = 6.7$  Hz, 3H).  $^{13}\text{C}$  NMR (101 MHz,  $\text{CDCl}_3$ )  $\delta$  75.8, 67.2, 59.9, 43.6, 27.4, 27.0, 22.9, 19.7, 18.4, 13.8. IR 2855, 1364, 1059, 823  $\text{cm}^{-1}$ .

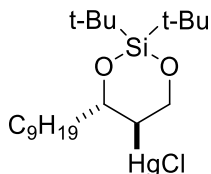

2,2-di-*tert*-butyl-4-nonyl-1,3,2-dioxasilinan-5-yl)mercury(II) chloride

**Compound 24:** (Purified using a gradient of 0 to 100% EtOAc in hexanes, White solid, 70% yield);  $^1\text{H}$  NMR (400 MHz,  $\text{CDCl}_3$ )  $\delta$  4.32 (dd,  $J = 12.7, 11.1$  Hz, 1H), 4.23 (td,  $J = 7.2, 3.6$  Hz, 1H), 4.18 (dd,  $J = 11.1, 4.2$  Hz, 1H), 2.92 (ddd,  $J = 12.7, 11.0, 4.1$  Hz, 1H), 1.60 – 1.35 (m, 4H), 1.22 (d,  $J = 6.7$  Hz, 12H), 0.96 (s, 9H), 0.91 (s, 9H), 0.85 – 0.77 (m, 3H).  $^{13}\text{C}$  NMR (101 MHz,  $\text{CDCl}_3$ )  $\delta$  76.1, 67.2, 59.9, 41.5, 31.9, 29.6, 29.5, 29.37, 29.30, 27.5, 27.1, 25.1, 22.8, 22.6, 19.7, 14.1. IR 2919, 1471, 1035, 823  $\text{cm}^{-1}$ .

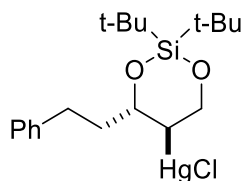

((*4S,5R*)-2,2-di-*tert*-butyl-4-phenethyl-1,3,2-dioxasilinan-5-yl)mercury(II) chloride

**Compound 25:** (Purified using a gradient of 0 to 100% EtOAc in hexanes, White solid, 68% yield);  $^1\text{H}$  NMR (400 MHz,  $\text{CDCl}_3$ )  $\delta$  7.34 – 7.27 (m, 2H), 7.25 – 7.18 (m, 3H), 4.34 (dd,  $J = 12.6, 11.1$  Hz, 1H), 4.27 (ddd,  $J = 11.6, 8.4, 3.5$  Hz, 1H), 4.21 (dd,  $J = 11.2, 4.1$  Hz, 1H), 3.08 – 2.85

(m, 2H), 2.79 (dt,  $J = 13.8, 7.9$  Hz, 1H), 2.03 – 1.83 (m, 2H), 1.04 (d,  $J = 8.5$  Hz, 18H).  $^{13}\text{C}$  NMR (101 MHz,  $\text{CDCl}_3$ )  $\delta$  141.8, 128.6, 128.6, 126.0, 75.2, 67.0, 59.7, 43.1, 31.2, 27.4, 27.1, 22.9, 19.7. IR 2860, 1465, 1024, 824  $\text{cm}^{-1}$ .

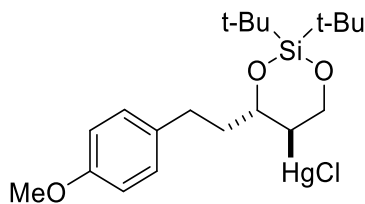

2,2-di-*tert*-butyl-4-(4-methoxyphenethyl)-1,3,2-dioxasilinan-5-ylmercury(II) chloride

**Compound 26:** (Purified using a gradient of 0 to 100% EtOAc in hexanes, Colorless oil, 61% yield);  $^1\text{H}$  NMR (400 MHz,  $\text{CDCl}_3$ )  $\delta$  7.13 – 6.98 (m, 2H), 6.83 – 6.68 (m, 2H), 4.26 (dd,  $J = 12.6, 11.1$  Hz, 1H), 4.19 (ddd,  $J = 11.5, 8.2, 3.6$  Hz, 1H), 4.13 (dd,  $J = 11.1, 4.1$  Hz, 1H), 3.72 (s, 3H), 2.90 (ddd,  $J = 12.6, 11.1, 4.1$  Hz, 1H), 2.79 (ddd,  $J = 13.6, 7.6, 5.8$  Hz, 1H), 2.66 (dt,  $J = 13.8, 7.8$  Hz, 1H), 1.90 – 1.70 (m, 2H), 0.97 (s, 9H), 0.95 (s, 9H).  $^{13}\text{C}$  NMR (101 MHz,  $\text{CDCl}_3$ )  $\delta$  158.1, 134.0, 129.6, 114.2, 75.3, 67.2, 59.9, 55.4, 43.5, 30.3, 27.5, 27.2, 23.0, 19.9. IR 2937, 1511, 1029, 825  $\text{cm}^{-1}$ .

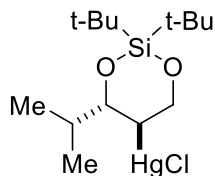

2,2-di-*tert*-butyl-4-isopropyl-1,3,2-dioxasilinan-5-ylmercury(II) chloride

**Compound 27:** (Purified using a gradient of 0 to 100% EtOAc in hexanes, White solid, 54% yield);  $^1\text{H}$  NMR (400 MHz,  $\text{CDCl}_3$ )  $\delta$  4.40 (dd,  $J = 12.6, 10.9$  Hz, 1H), 4.30 (dd,  $J = 10.9, 4.3$  Hz, 1H), 4.23 (dd,  $J = 11.4, 2.2$  Hz, 1H), 3.07 (ddd,  $J = 12.6, 11.3, 4.3$  Hz, 1H), 1.77 (pd,  $J = 6.7, 2.1$  Hz, 1H), 1.08 (d,  $J = 6.6$  Hz, 3H), 1.03 (s, 9H), 0.99 (s, 9H), 0.96 (d,  $J = 6.7$  Hz, 3H).  $^{13}\text{C}$  NMR (101 MHz,  $\text{CDCl}_3$ )  $\delta$  80.4, 67.7, 58.2, 38.0, 27.7, 27.2, 23.2, 20.2, 20.2, 14.9. IR 2961, 1472, 1071, 759  $\text{cm}^{-1}$ .

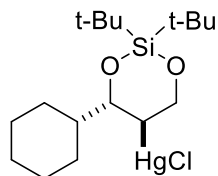

2,2-di-*tert*-butyl-4-cyclohexyl-1,3,2-dioxasilinan-5-ylmercury(II) chloride

**Compound 28:** (Purified using a gradient of 0 to 100% EtOAc in hexanes, White solid, 62% yield);  $^1\text{H}$  NMR (400 MHz,  $\text{CDCl}_3$ )  $\delta$  4.33 (dd,  $J = 12.6, 11.0$  Hz, 1H), 4.23 (dd,  $J = 10.9, 4.3$  Hz, 1H), 4.11 (dd,  $J = 11.4, 1.7$  Hz, 1H), 3.04 (ddd,  $J = 12.6, 11.3, 4.3$  Hz, 1H), 1.80 – 1.66 (m, 2H), 1.66 – 1.43 (m, 4H), 1.36 – 1.01 (m, 5H), 0.95 (s, 9H), 0.92 (s, 9H).  $^{13}\text{C}$  NMR (101 MHz,  $\text{CDCl}_3$ )  $\delta$  80.4, 67.7, 57.6, 48.2, 30.5, 27.7, 27.2, 26.52, 26.50, 26.3, 25.4, 23.1, 20.1. IR 919, 1472, 1112, 1012  $\text{cm}^{-1}$ .



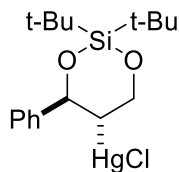

2,2-di-*tert*-butyl-4-phenyl-1,3,2-dioxasilinan-5-yl)mercury(II) chloride

**Compound 29:** (Purified using a gradient of 0 to 100% EtOAc in hexanes, White solid, 60% yield);  $^1\text{H}$  NMR (400 MHz,  $\text{CDCl}_3$ )  $\delta$  7.42 – 7.38 (m, 2H), 7.36 – 7.29 (m, 2H), 7.27 – 7.21 (m, 1H), 5.29 (d,  $J = 11.4$  Hz, 1H), 4.52 – 4.36 (m, 1H), 4.19 (dd,  $J = 11.2, 4.2$  Hz, 1H), 3.16 (ddd,  $J = 12.8, 11.3, 4.2$  Hz, 1H), 1.04 (s, 9H), 1.01 (s, 9H).  $^{13}\text{C}$  NMR (101 MHz,  $\text{CDCl}_3$ )  $\delta$  146.0, 129.4, 128.5, 125.4, 79.5, 67.5, 64.0, 27.5, 27.2, 23.0, 20.1. IR 2866, 1471, 1065, 829  $\text{cm}^{-1}$ .

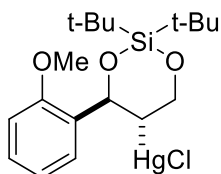

(2,2-di-*tert*-butyl-4-(2-methoxyphenyl)-1,3,2-dioxasilinan-5-yl)mercury(II) chloride

**Compound 30:** (Purified using a gradient of 0 to 100% EtOAc in hexanes, White solid, 52% yield);  $^1\text{H}$  NMR (400 MHz,  $\text{CDCl}_3$ )  $\delta$  7.62 (dd,  $J = 7.6, 1.7$  Hz, 1H), 7.22 (ddd,  $J = 8.2, 7.4, 1.8$  Hz, 1H), 7.00 (td,  $J = 7.5, 1.1$  Hz, 1H), 6.82 (dd,  $J = 8.3, 1.1$  Hz, 1H), 5.64 (d,  $J = 10.8$  Hz, 1H), 4.49 (dd,  $J = 12.9, 11.2$  Hz, 1H), 4.21 (dd,  $J = 11.3, 4.1$  Hz, 1H), 3.84 (s, 3H), 2.85 (ddd,  $J = 12.9, 10.8, 4.1$  Hz, 1H), 1.13 (s, 9H), 1.09 (s, 9H).  $^{13}\text{C}$  NMR (101 MHz,  $\text{CDCl}_3$ )  $\delta$  153.5, 133.0, 129.0, 126.6, 121.8, 110.4, 73.2, 67.9, 59.6, 55.2, 27.7, 27.4, 23.1, 20.3. IR 2949, 1489, 1094, 753  $\text{cm}^{-1}$ .

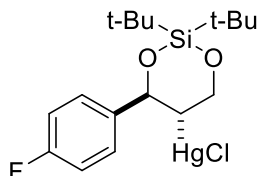

(2,2-di-*tert*-butyl-4-(4-fluorophenyl)-1,3,2-dioxasilinan-5-yl)mercury(II) chloride

**Compound 31:** (Purified using a gradient of 0 to 100% EtOAc in hexanes, White solid, 59% yield);  $^1\text{H}$  NMR (400 MHz,  $\text{CDCl}_3$ )  $\delta$  7.50 – 7.38 (m, 2H), 7.15 – 7.01 (m, 2H), 5.34 (d,  $J = 11.4$  Hz, 1H), 4.54 (dd,  $J = 12.8, 11.2$  Hz, 1H), 4.28 (dd,  $J = 11.2, 4.2$  Hz, 1H), 3.22 (ddd,  $J = 12.7, 11.4, 4.2$  Hz, 1H), 1.10 (s, 9H), 1.08 (s, 9H).  $^{13}\text{C}$  NMR (101 MHz,  $\text{CDCl}_3$ )  $\delta$  162.5 (d,  $J = 240$  Hz), 141.8, 127.1 (d,  $J = 8.2$  Hz), 116.3 (d,  $J = 21.6$  Hz), 78.9, 67.3, 63.8, 27.5, 27.2, 23.0, 20.1. IR 2943, 1377, 1035, 812  $\text{cm}^{-1}$ .

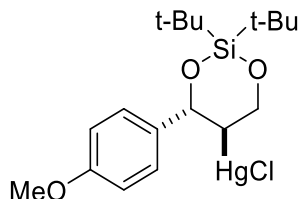

2,2-di-*tert*-butyl-4-(4-methoxyphenyl)-1,3,2-dioxasilinan-5-yl)mercury(II) chloride

**Compound 32:** (Purified using a gradient of 0 to 100% EtOAc in hexanes, White solid, 43% yield);  $^1\text{H}$  NMR (400 MHz,  $\text{CDCl}_3$ )  $\delta$  7.43 – 7.34 (m, 2H), 6.96 – 6.87 (m, 2H), 5.31 (d,  $J = 11.3$  Hz, 1H), 4.53 (dd,  $J = 12.8, 11.2$  Hz, 1H), 4.27 (dd,  $J = 11.1, 4.2$  Hz, 1H), 3.81 (s, 3H), 3.27 (ddd,  $J = 12.8, 11.4, 4.2$  Hz, 1H), 1.09 (s, 9H), 1.08 (s, 9H).  $^{13}\text{C}$  NMR (126 MHz,  $\text{CDCl}_3$ )  $\delta$  159.7, 138.3, 126.7, 114.9, 79.2, 67.6, 64.3, 55.5, 27.7, 27.4, 23.2, 20.2. IR 2949, 1512, 1100, 829  $\text{cm}^{-1}$ .

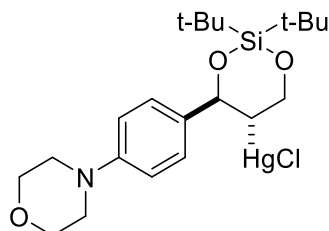

2,2-di-*tert*-butyl-4-(4-morpholinophenyl)-1,3,2-dioxasilinan-5-ylmercury(II) chloride

**Compound 33:** (Purified using a gradient of 0 to 100% EtOAc in hexanes, Colorless solid, 56% yield);  $^1\text{H}$  NMR (400 MHz,  $\text{CDCl}_3$ )  $\delta$  1.08 (s, 9H), 1.09 (s, 9H), 3.1 – 3.2 (m, 4H), 3.3 (ddd,  $J = 12.8, 11.4, 4.2$  Hz, 1H), 3.8 – 3.9 (m, 4H), 4.3 (dd,  $J = 11.2, 4.2$  Hz, 1H), 4.5 – 4.6 (m, 1H), 5.3 (d,  $J = 11.4$  Hz, 1H), 6.9 (d,  $J = 8.8$  Hz, 2H), 7.4 (d,  $J = 8.7$  Hz, 2H);  $^{13}\text{C}$  NMR (101 MHz,  $\text{CDCl}_3$ )  $\delta$  19.8, 22.7, 26.9, 27.2, 48.8, 63.7, 66.5, 67.1, 78.7, 115.9, 126.0, 136.9, 150.9; IR 2930, 2856, 1515, 1068, 815, 650  $\text{cm}^{-1}$ .

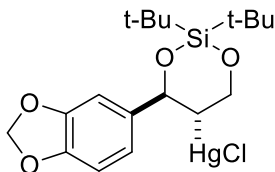

4-(benzo[*d*][1,3]dioxol-5-yl)-2,2-di-*tert*-butyl-1,3,2-dioxasilinan-5-ylmercury(II) chloride

**Compound 34:** (Purified using a gradient of 0 to 100% EtOAc in hexanes, Colorless solid, 55% yield);  $^1\text{H}$  NMR (400 MHz,  $\text{CDCl}_3$ )  $\delta$  1.08 (s, 9H), 1.09 (s, 9H), 3.2 – 3.3 (m, 1H), 4.3 (dd,  $J = 11.2, 4.2$  Hz, 1H), 4.5 (dd,  $J = 12.8, 11.2$  Hz, 1H), 5.3 (d,  $J = 11.3$  Hz, 1H), 6.0 (s, 2H), 6.8 (d,  $J = 7.9$  Hz, 1H), 6.9 (d,  $J = 1.7$  Hz, 1H), 7.0 (d,  $J = 1.7$  Hz, 1H);  $^{13}\text{C}$  NMR (101 MHz,  $\text{CDCl}_3$ )  $\delta$  20.1, 23.1, 27.3, 27.6, 64.0, 67.4, 79.3, 101.3, 105.8, 108.8, 118.9, 140.3, 147.7, 148.6; IR 2932, 2857, 1442, 1246, 825, 650  $\text{cm}^{-1}$ .

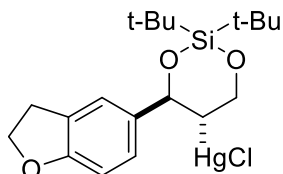

2,2-di-*tert*-butyl-4-(2,3-dihydrobenzofuran-5-yl)-1,3,2-dioxasilinan-5-ylmercury(II) chloride

**Compound 35:** (Purified using a gradient of 0 to 100% EtOAc in hexanes, Colorless solid, 50% yield);  $^1\text{H}$  NMR (400 MHz,  $\text{CDCl}_3$ )  $\delta$  0.9 – 1.2 (m, 18H), 3.1 – 3.4 (m, 3H), 4.3 (dd,  $J = 11.1, 4.2$  Hz, 1H), 4.4 – 4.7 (m, 3H), 5.3 (d,  $J = 11.4$  Hz, 1H), 6.8 (d,  $J = 8.2$  Hz, 1H), 7.2 (dd,  $J = 8.1, 2.0$  Hz, 1H), 7.2 – 7.4 (m, 1H);  $^{13}\text{C}$  NMR (101 MHz,  $\text{CDCl}_3$ )  $\delta$  19.8, 22.7, 26.9, 27.2, 29.4, 64.0, 67.2,

71.1, 79.0, 109.6, 121.7, 125.0, 128.1, 138.0, 159.9; IR  $\nu_{\text{max}}$  = 2931, 2857, 1613, 1491, 1094, 764, 650  $\text{cm}^{-1}$ .

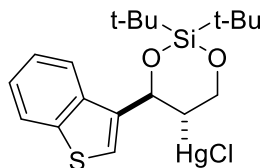

4-(benzo[*b*]thiophen-3-yl)-2,2-di-*tert*-butyl-1,3,2-dioxasilinan-5-ylmercury(II) chloride

**Compound 36:** (Purified using a gradient of 0 to 100% EtOAc in hexanes, Colorless solid, 52% yield);  $^1\text{H}$  NMR (400 MHz,  $\text{CDCl}_3$ )  $\delta$  1.11 (s, 9H), 1.12 (s, 9H), 3.3 (ddd,  $J = 12.5, 11.0, 4.2$  Hz, 1H), 4.3 (dd,  $J = 11.3, 4.2$  Hz, 1H), 4.5 – 4.7 (m, 1H), 5.8 (dd,  $J = 11.2, 2.7$  Hz, 1H), 7.3 – 7.5 (m, 2H), 7.6 (d,  $J = 2.4$  Hz, 1H), 7.9 (d,  $J = 7.9$  Hz, 2H).  $^{13}\text{C}$  NMR (101 MHz,  $\text{CDCl}_3$ )  $\delta$  20.1, 23.1, 27.2, 27.5, 60.2, 67.7, 74.2, 121.1, 123.4, 123.7, 124.8, 125.0, 136.0, 140.1, 141.2; IR 2931, 2856, 1471, 1260, 1019, 764, 648  $\text{cm}^{-1}$ .

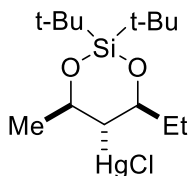

2,2-di-*tert*-butyl-4-ethyl-6-methyl-1,3,2-dioxasilinan-5-ylmercury(II) chloride

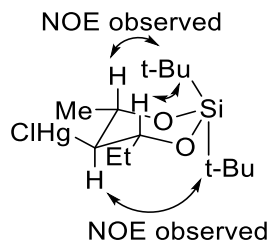

**Compound 37:** (Purified using a gradient of 0 to 100% EtOAc in hexanes, White foam, 88% yield);  $^1\text{H}$  NMR (400 MHz,  $\text{CDCl}_3$ )  $\delta$  4.40 (dq,  $J = 11.1, 6.1$  Hz, 1H), 4.16 (ddd,  $J = 11.2, 8.1, 3.0$  Hz, 1H), 2.60 (t,  $J = 11.2$  Hz, 1H), 1.66 (dddd,  $J = 14.7, 10.3, 6.8, 3.0$  Hz, 1H), 1.54 – 1.41 (m, 1H), 1.31 (d,  $J = 6.1$  Hz, 3H), 0.96 (d,  $J = 8.8$  Hz, 12H), 0.90 (s, 9H).  $^{13}\text{C}$  NMR (101 MHz,  $\text{CDCl}_3$ )  $\delta$  76.6, 72.5, 67.1, 34.9, 28.2, 27.6, 27.2, 22.9, 19.7, 9.5. IR 2902, 1477, 994, 823  $\text{cm}^{-1}$ .

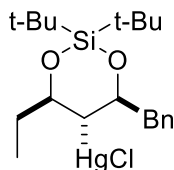

4-benzyl-2,2-di-*tert*-butyl-6-ethyl-1,3,2-dioxasilinan-5-ylmercury(II) chloride

**Compound 38:** (Purified using a gradient of 0 to 100% EtOAc in hexanes, Colorless solid, 85% yield);  $^1\text{H}$  NMR (400 MHz,  $\text{CDCl}_3$ )  $\delta$  0.9 – 1.1 (m, 21H), 1.4 – 1.6 (m, 1H), 1.6 – 1.8 (m, 1H), 2.3 (t,  $J = 11.3$  Hz, 1H), 2.6 (dd,  $J = 13.7, 9.8$  Hz, 1H), 3.3 (dd,  $J = 13.7, 4.3$  Hz, 1H), 4.2 (ddd,  $J =$

11.0, 8.0, 2.9 Hz, 1H), 4.6 (ddd,  $J = 11.2, 9.7, 4.3$  Hz, 1H), 7.1 – 7.2 (m, 2H), 7.3 – 7.4 (m, 3H);  $^{13}\text{C}$  NMR (101 MHz,  $\text{CDCl}_3$ )  $\delta$  9.4, 19.7, 22.8, 27.1, 27.5, 35.7, 46.5, 60.6, 76.8, 78.4, 128.1, 129.2, 130.0, 137.8; IR 2931, 2856, 1471, 1041, 824, 696  $\text{cm}^{-1}$ .

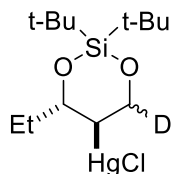

2,2-di-*tert*-butyl-4-ethyl-1,3,2-dioxasilinan-5-yl-6-*d*)mercury(II) chloride

**Compound 39:** (Purified using a gradient of 0 to 100% EtOAc in hexanes, White solid, 57% yield); 1:1 mixture of diastereomers;  $^1\text{H}$  NMR (400 MHz,  $\text{CDCl}_3$ )  $\delta$  4.37 (d,  $J = 12.9$  Hz, 1H), 4.28 – 4.19 (m, 3H), 3.05 – 2.95 (m, 2H), 1.70 (dtd,  $J = 14.5, 7.3, 3.0$  Hz, 2H), 1.63 – 1.52 (m, 2H), 1.07 – 1.04 (m, 6H), 1.03 (s, 18H), 0.98 (s, 18H).  $^{13}\text{C}$  NMR (101 MHz,  $\text{CDCl}_3$ )  $\delta$  77.4, 66.8 (t,  $J = 20.5$  Hz), 59.4, 34.6, 27.6, 27.2, 23.0, 19.9, 9.7. IR 2949, 1353, 1205, 1065  $\text{cm}^{-1}$ .

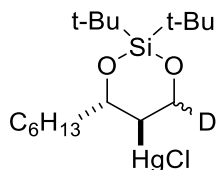

2,2-di-*tert*-butyl-4-hexyl-1,3,2-dioxasilinan-5-yl-6-*d*)mercury(II) chloride

**Compound 40:** (Purified using a gradient of 0 to 100% EtOAc in hexanes, White solid, 74% yield); 1:1 mixture of diastereomers;  $^1\text{H}$  NMR (400 MHz,  $\text{CDCl}_3$ )  $\delta$  4.39 (d,  $J = 12.8$  Hz, 1H), 4.32 (ddd,  $J = 11.2, 7.3, 4.0$  Hz, 2H), 4.25 (d,  $J = 4.0$  Hz, 1H), 3.08 – 2.90 (m, 2H), 1.68 – 1.43 (m, 8H), 1.33 (pt,  $J = 7.5, 3.8$  Hz, 12H), 1.06 (s, 18H), 1.01 (s, 18H), 0.95 – 0.86 (m, 6H).  $^{13}\text{C}$  NMR (101 MHz,  $\text{CDCl}_3$ )  $\delta$  76.1, 66.7, 59.8, 41.5, 31.8, 29.0, 27.4, 27.0, 25.1, 22.8, 22.6, 19.7, 14.0. IR 2931, 1459, 1053, 736  $\text{cm}^{-1}$ .

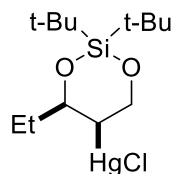

2,2-di-*tert*-butyl-4-ethyl-1,3,2-dioxasilinan-5-yl)mercury(II) chloride

**Compound 41:** (Purified using a gradient of 0 to 100% EtOAc in hexanes, White solid, 43% yield);  $^1\text{H}$  NMR (400 MHz,  $\text{CDCl}_3$ )  $\delta$  4.63 (dd,  $J = 12.5, 2.2$  Hz, 1H), 4.44 (ddd,  $J = 7.4, 4.7, 2.2$  Hz, 1H), 4.21 (dd,  $J = 12.4, 2.2$  Hz, 1H), 3.00 (q,  $J = 2.2$  Hz, 1H), 1.68 – 1.54 (m, 1H), 1.54 – 1.41 (m, 1H), 1.09 (d,  $J = 4.8$  Hz, 18H), 0.99 (t,  $J = 7.4$  Hz, 3H).  $^{13}\text{C}$  NMR (101 MHz,  $\text{CDCl}_3$ )  $\delta$  79.3, 68.9, 62.4, 35.2, 28.6, 27.9, 23.2, 19.4, 9.9. IR 2933, 1471, 994, 650  $\text{cm}^{-1}$ .

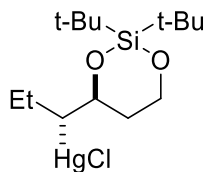

2,2-di-*tert*-butyl-1,3,2-dioxasilinan-4-yl)propyl)mercury(II) chloride

**Compound 42:** (Purified using a gradient of 0 to 100% EtOAc in hexanes, White solid, 18% yield);  $^1\text{H}$  NMR (400 MHz,  $\text{CDCl}_3$ )  $\delta$  4.41 (ddd,  $J = 10.9, 5.2, 1.9$  Hz, 1H), 4.13 – 3.98 (m, 2H), 2.98 (dt,  $J = 11.1, 5.0$  Hz, 1H), 1.89 – 1.73 (m, 2H), 1.73 – 1.55 (m, 2H), 1.03 (t,  $J = 7.2$  Hz, 3H), 0.96 (d,  $J = 3.7$  Hz, 18H).  $^{13}\text{C}$  NMR (101 MHz,  $\text{CDCl}_3$ )  $\delta$  76.6, 68.7, 64.4, 39.0, 27.5, 26.9, 23.4, 22.7, 19.7, 16.5. IR 2949, 1472, 1106, 826  $\text{cm}^{-1}$ .

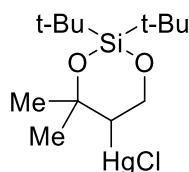

(2,2-di-*tert*-butyl-4,4-dimethyl-1,3,2-dioxasilinan-5-yl)mercury(II) chloride

**Compound 45:** (Purified using a gradient of 0 to 100% EtOAc in hexanes, White solid, 30% yield);  $^1\text{H}$  NMR (400 MHz,  $\text{CDCl}_3$ )  $\delta$  4.38 (t,  $J = 11.9$  Hz, 1H), 4.13 (dd,  $J = 11.7, 3.6$  Hz, 1H), 3.21 – 3.01 (m, 1H), 1.45 (s, 3H), 1.40 (s, 3H), 0.94 (d,  $J = 7.0$  Hz, 18H).  $^{13}\text{C}$  NMR (101 MHz,  $\text{CDCl}_3$ )  $\delta$  74.9, 65.1, 63.4, 34.4, 32.7, 27.5, 27.4, 21.4, 20.3. IR 2849, 1477, 1065, 648  $\text{cm}^{-1}$ .

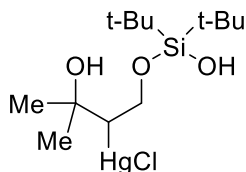

(1-((di-*tert*-butyl(hydroxy)silyl)oxy)-3-hydroxy-3-methylbutan-2-yl)mercury(II) chloride

**Compound 46:** (Purified using a gradient of 0 to 100% EtOAc in hexanes, White solid, 35% yield);  $^1\text{H}$  NMR (400 MHz,  $\text{CDCl}_3$ )  $\delta$  4.34 (dd,  $J = 11.2, 4.8$  Hz, 1H), 4.20 (dd,  $J = 11.2, 4.9$  Hz, 1H), 2.88 (t,  $J = 4.8$  Hz, 1H), 1.33 (d,  $J = 1.9$  Hz, 6H), 0.98 (d,  $J = 1.9$  Hz, 18H).  $^{13}\text{C}$  NMR (101 MHz,  $\text{CDCl}_3$ )  $\delta$  73.9, 71.9, 64.5, 33.2, 29.8, 27.7, 27.6, 20.4, 20.1. IR 2866, 1465, 1082, 818  $\text{cm}^{-1}$ .

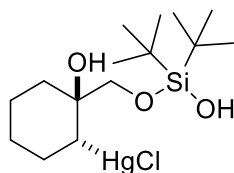

(2-(((di-*tert*-butyl(hydroxy)silyl)oxy)methyl)-2-hydroxycyclohexyl)mercury(II) chloride

**Compound 47:** (Purified using a gradient of 0 to 100% EtOAc in hexanes, White solid, 73% yield);  $^1\text{H}$  NMR (400 MHz,  $\text{CDCl}_3$ )  $\delta$  3.87 (q,  $J = 10.3$  Hz, 2H), 2.78 (dd,  $J = 9.1, 3.8$  Hz, 1H), 2.18 (ddt,  $J = 14.4, 6.9, 3.7$  Hz, 1H), 1.92 – 1.65 (m, 3H), 1.65 – 1.36 (m, 4H), 1.09 (s, 18H).  $^{13}\text{C}$

NMR (101 MHz,  $\text{CDCl}_3$ )  $\delta$  74.6, 71.3, 59.2, 36.9, 29.3, 28.3, 27.8, 27.7, 22.2, 20.8, 20.7. IR 3520, 2943, 1465, 1365  $\text{cm}^{-1}$ .

Mass Spectrum of **Compound 31** showing a characteristic fragmentation in ESI-positive mode. See Section VIII for crystallographic data establishing the structure of **Compound 31**.

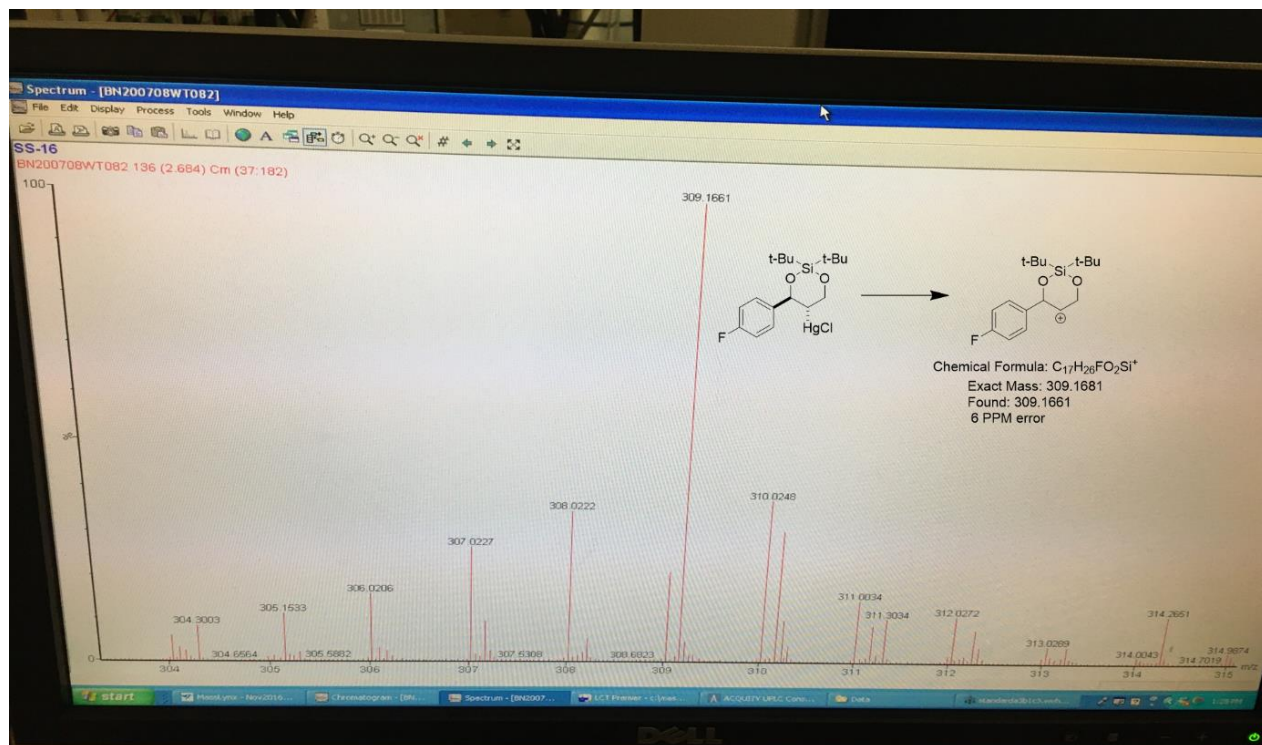

## VI. Scale-up Reaction

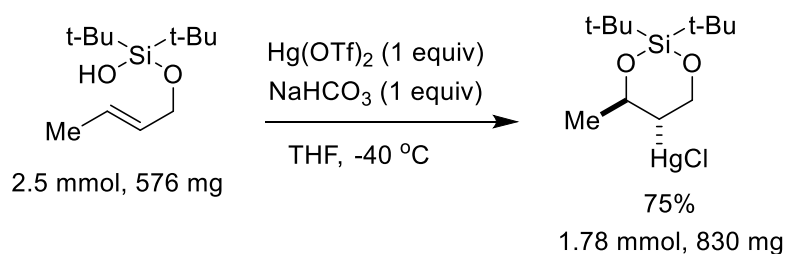

A 50 mL round-bottom flask was charged with a mixture of  $\text{Hg}(\text{OTf})_2$  (1.248 g, 2.5 mmol, 1 equiv),  $\text{NaHCO}_3$  (210 mg, 2.5 mmol, 1 equiv) and dry THF (15 mL). The flask was immersed into a cooling bath set to  $-40 \text{ }^\circ\text{C}$ . Following this, a solution of allylic silanediol (576 mg, 2.5 mmol) in dry THF (10 mL) was added dropwise. After 16 hours at  $-40 \text{ }^\circ\text{C}$ , 5 mL of saturated aqueous NaCl was added dropwise. The mixture was warmed to room temperature and transferred to a separatory funnel with ethyl acetate. The organic layer was collected, and the aqueous layer was extracted with additional ethyl acetate. The organic fractions were combined, dried with  $\text{Na}_2\text{SO}_4$ , and concentrated under reduced pressure. The resulting residue was purified by chromatography on

silica gel (gradient of 3 to 5% ethyl acetate in hexanes) to furnish silanediol product (830 mg, 1.78 mmol) as a white solid.

## VII. Derivatization of Silanediol Organomercurial Products

### (a) Hydroxylation

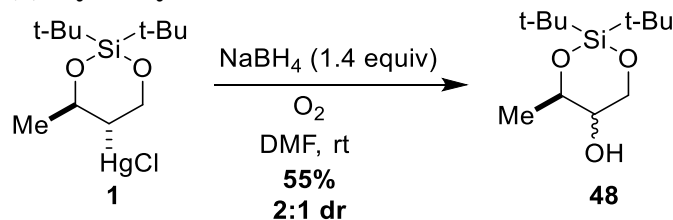

Oxygen gas (O<sub>2</sub>) was bubbled into a well-stirred solution of NaBH<sub>4</sub> (11 mg, 0.29 mmol, 1.4 equiv) in DMF (1.5 mL) at room temperature for 15 min. Following this time, a solution of **1** (93.1 mg, 0.2 mmol) in DMF (4 mL) was added dropwise. During and after addition, O<sub>2</sub> was continuously bubbled. After 2 h at room temperature, the mixture was diluted with ethyl acetate, filtered through a pad of celite, transferred to a separatory funnel, and washed with water and brine. The organic layer was collected, dried over anhydrous MgSO<sub>4</sub>, and concentrated under reduced pressure. The resulting residue was purified by chromatography on silica gel (gradient of 15 to 20% ethyl acetate in hexanes) to yield **48** (26.9 mg, 55%) as a 2:1 mixture of diastereomers as a colorless oil. <sup>1</sup>H NMR (400 MHz, CDCl<sub>3</sub>) δ 0.9 – 1.0 (m, 27H), 1.2 (d, *J* = 6.4 Hz, 1.5H), 1.3 (d, *J* = 6.1 Hz, 3H), 3.4 (ddd, *J* = 10.1, 8.7, 4.6 Hz, 1.5H), 3.7 (t, *J* = 10.3 Hz, 1H), 3.9 (dq, *J* = 8.7, 6.0 Hz, 1H), 3.9 – 4.1 (m, 1.5H), 4.2 (dd, *J* = 12.0, 1.7 Hz, 0.5H), 4.3 (qd, *J* = 6.4, 1.6 Hz, 0.5H); <sup>13</sup>C NMR (101 MHz, CDCl<sub>3</sub>) δ 19.6, 19.8, 20.3, 20.9, 22.2, 22.8, 26.7, 26.8, 27.2, 27.6, 68.1, 69.3, 71.3, 71.9, 72.0, 74.5; IR 3437, 2933, 2859, 1473, 1053, 824, 650 cm<sup>-1</sup>; HRMS calculated for C<sub>12</sub>H<sub>25</sub>O<sub>3</sub>Si 245.1578 Found 245.1595.

### (b) Demercuration

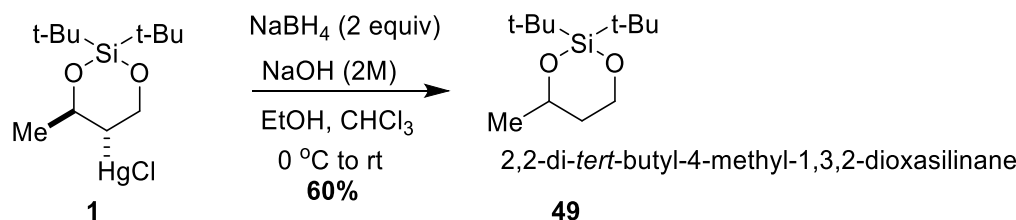

A reaction flask was charged with **1** (93.1 mg, 0.2 mmol), 2M NaOH (0.2 mL), EtOH (1.5 mL), and CHCl<sub>3</sub> (1.5 mL). This mixture was cooled to 0 °C using an ice-water bath. At this temperature, NaBH<sub>4</sub> (15.2 mg, 0.4 mmol) was added in one portion. After stirring for 30 min at room temperature, the mixture was acidified with 3M HCl, transferred to a separatory funnel, and extracted with CHCl<sub>3</sub> (3 x 5 mL). The combined extracts were washed with brine, dried over anhydrous Na<sub>2</sub>SO<sub>4</sub> and concentrated under reduced pressure. The crude residue was purified by chromatography on silica gel (hexanes) to yield purified **49** (28 mg, 61%) as a colorless oil. <sup>1</sup>H NMR (400 MHz, CDCl<sub>3</sub>) δ 1.0 (s, 9H), 1.0 (s, 9H), 1.2 (d, *J* = 6.1 Hz, 3H), 1.6 (dq, *J* = 14.2, 2.6 Hz, 1H), 1.8 (dddd, *J* = 14.2, 10.4, 8.7, 7.5 Hz, 1H), 4.1 (d, *J* = 2.6 Hz, 1H), 4.1 (dd, *J* = 2.7, 1.3 Hz, 1H), 4.2 (dq, *J* = 12.3, 6.1, 2.7 Hz, 1H); <sup>13</sup>C NMR (101 MHz, CDCl<sub>3</sub>) δ 19.5, 22.2, 24.4,

26.8, 27.1, 37.8, 63.8, 70.0; IR 2932, 2858, 1473, 1113, 969, 824, 648  $\text{cm}^{-1}$ ; HRMS calculated for  $\text{C}_{12}\text{H}_{25}\text{O}_2\text{Si}^-$  229.1629 Found 229.1645.

### (c) Iodination

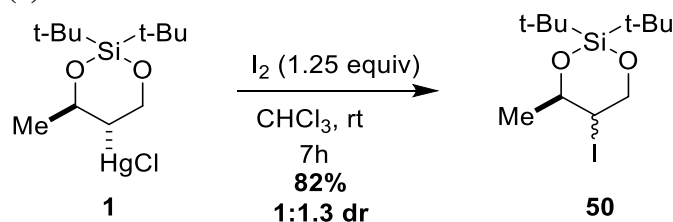

$\text{I}_2$  (63.5 mg, 0.25 mmol, 1.25 equiv) was added to a solution of **1** (93.1 mg, 0.2 mmol) in 3 mL of  $\text{CHCl}_3$ . After being stirred for 7 h, the mixture was diluted with dichloromethane and quenched with saturated aqueous  $\text{Na}_2\text{S}_2\text{O}_3$  (2 mL) solution. In a separatory funnel, the organic layer was separated, collected, dried over anhydrous  $\text{Na}_2\text{SO}_4$ , and concentrated under reduced pressure. The resulting residue (containing a 1:1.3 mixture of diastereomers of **50**) was purified by chromatography on silica gel (hexanes) to yield 47% of one diastereomer and 35% of the other.

Data for major diastereomer:

(Colorless liquid, 47% yield);  $^1\text{H}$  NMR (400 MHz,  $\text{CDCl}_3$ )  $\delta$  0.98 (s, 9H), 1.03 (s, 9H), 1.5 (d,  $J = 6$  Hz, 3H), 4.0 (td,  $J = 10.5, 5.2$  Hz, 1H), 4.1 – 4.2 (m, 2H), 4.2 – 4.3 (m, 1H);  $^{13}\text{C}$  NMR (101 MHz,  $\text{CDCl}_3$ )  $\delta$  19.8, 22.8, 24.9, 26.9, 27.4, 34.2, 71.1, 75.8; IR 2932, 2858, 1473, 1135, 1044, 746  $\text{cm}^{-1}$ .

Data for minor diastereomer:

(Colorless solid, 35% yield);  $^1\text{H}$  NMR (400 MHz,  $\text{CDCl}_3$ )  $\delta$  1.04 (s, 9H), 1.07 (s, 9H), 1.4 (d,  $J = 6.3$  Hz, 3H), 4.1 (qd,  $J = 6.2, 3.8$  Hz, 1H), 4.3 – 4.4 (m, 2H), 4.5 (dt,  $J = 6.8, 3.8$  Hz, 1H);  $^{13}\text{C}$  NMR (101 MHz,  $\text{CDCl}_3$ )  $\delta$  20.6, 21.6, 23.4, 27.4, 27.6, 33.5, 68.1, 71.2; IR 2930, 2857, 1471, 1121, 1057, 765  $\text{cm}^{-1}$ .

## VIII. X-ray Crystallographic Study for Compound 31: $\text{Hg}(\text{Cl})(\text{C}_{17}\text{H}_{26}\text{O}_2\text{FSi})$ [q63k, (1)].

A complete set of unique reflections was collected with monochromated  $\text{CuK}\alpha$  radiation for a single-domain crystal of **1**. A total of 4521  $1.0^\circ$ -wide  $\omega$ - or  $\phi$ -scan frames with counting times of 4-6 seconds were collected on a Bruker Apex II CCD area detector. X-rays were provided by a Bruker MicroStar microfocus rotating anode operating at 45kV and 60 mA and equipped with Helios multilayer x-ray optics. Preliminary lattice constants were obtained with the Bruker program SMART.[S1] Integrated reflection intensities were produced using the Bruker program SAINT.[S2] The data set was corrected for variable absorption effects using a numerical face-indexed procedure. The Bruker software package SHELXTL was used to solve the structure using “direct methods” techniques. All stages of weighted full-matrix least-squares refinement were conducted using  $\text{Fo}^2$  data with the SHELXTL v2014 software package.[S3]

The final structural model incorporated anisotropic thermal parameters for all nonhydrogen atoms and isotropic thermal parameters for all hydrogen atoms. Hydrogen atoms were fixed at idealized riding-model  $\text{sp}^2$ - or  $\text{sp}^3$ -hybridized positions with C-H bond lengths of 0.95 – 1.00 Å. The eighteen methyl groups were



included in the structural model as idealized rigid rotors (with a C-H bond length of 0.98 Å) that were allowed to rotate freely about their C-C bonds in least-squares refinement cycles. Isotropic thermal parameters of the idealized hydrogen atoms were fixed at values 1.2 (non-methyl) or 1.5 (methyl) times the equivalent isotropic thermal parameter of the carbon atom to which they are covalently bonded. The relevant crystallographic and structure refinement data are given in Table S-1.

Note: Crystals were grown from pentane *via* slow evaporation.

CCDC: 2032765 (1)

Datablock q63k - ellipsoid plot

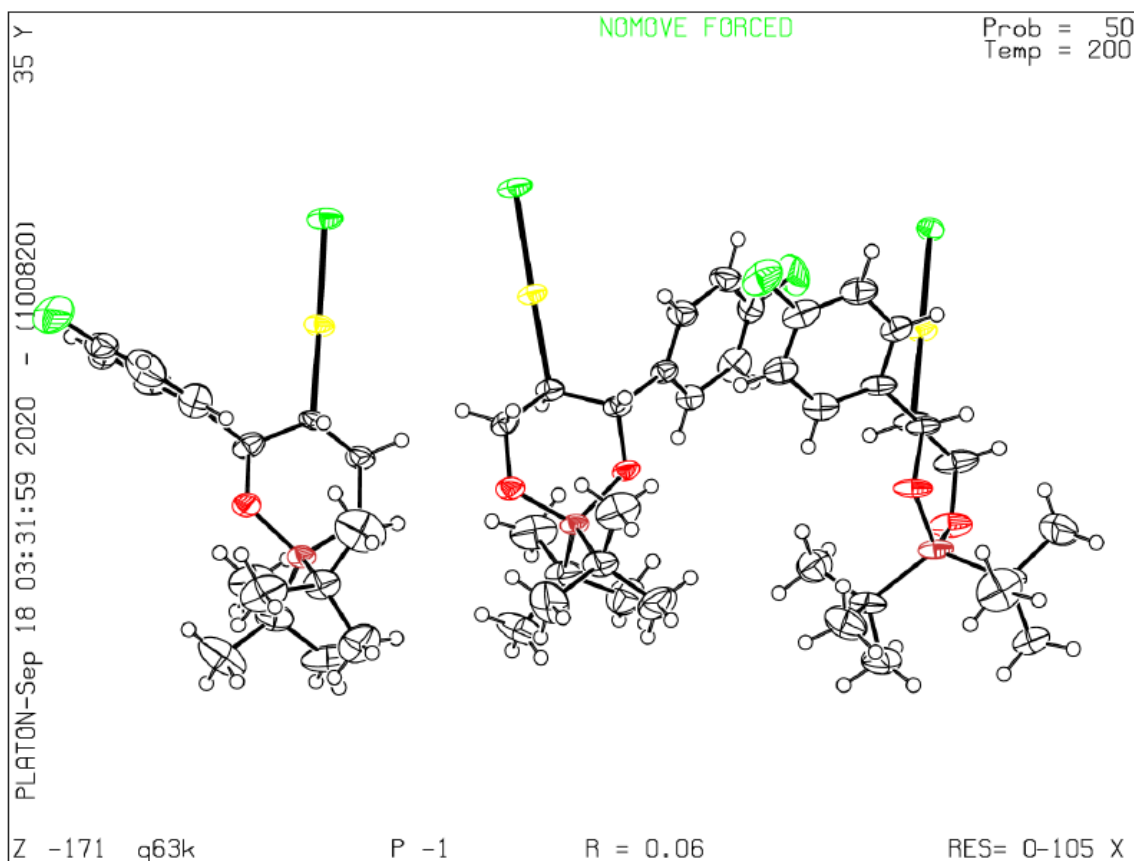

All nonhydrogen atoms are represented by thermal vibration ellipsoids drawn at the 50% probability level.

**Table S1.** Crystal and Refinement Data for **Hg(Cl)(C<sub>17</sub>H<sub>26</sub>O<sub>2</sub>FSi) (1)**.

|                                        | <b>1</b>                                                      |
|----------------------------------------|---------------------------------------------------------------|
| Empirical formula                      | C <sub>17</sub> H <sub>26</sub> ClFHgO <sub>2</sub> Si        |
| Formula weight                         | 545.51                                                        |
| Temperature                            | 200(2) K                                                      |
| Wavelength                             | 1.54178 Å                                                     |
| Crystal system                         | Triclinic                                                     |
| Space group                            | P-1 - Ci <sup>1</sup> (No. 2)                                 |
| <i>a</i>                               | 12.3430(7) Å                                                  |
| <i>b</i>                               | 13.6880(8) Å                                                  |
| <i>c</i>                               | 20.8227(11) Å                                                 |
| $\alpha$                               | 105.8493(19)°                                                 |
| $\beta$                                | 94.109(2)°                                                    |
| $\gamma$                               | 113.192(2)°                                                   |
| Volume                                 | 3046.2(3) Å <sup>3</sup>                                      |
| Z                                      | 6                                                             |
| Density (calculated)                   | 1.784 g/cm <sup>3</sup>                                       |
| Absorption coefficient                 | 15.493 mm <sup>-1</sup>                                       |
| F(000)                                 | 1584                                                          |
| Crystal size                           | 0.093 x 0.077 x 0.055 mm <sup>3</sup>                         |
| Theta range                            | 2.25 to 70.46°                                                |
| Index ranges                           | -13 ≤ <i>h</i> ≤ 14, -16 ≤ <i>k</i> ≤ 16, -24 ≤ <i>l</i> ≤ 24 |
| Reflections collected                  | 40728                                                         |
| Independent reflections                | 10681 [R <sub>int</sub> = 0.055]                              |
| Completeness to $\theta = 66.00^\circ$ | 95.9 %                                                        |
| Absorption correction                  | Numerical face-indexed                                        |
| Max. and min. transmission             | 1.000 and 0.579                                               |
| Refinement method                      | Full-matrix least-squares on F <sup>2</sup>                   |
| Data / restraints / parameters         | 10681/0/640                                                   |

|                                      |                                           |
|--------------------------------------|-------------------------------------------|
| Goodness-of-fit on $F^2$             | 1.117                                     |
| Final R indices [ $I > 2\sigma(I)$ ] | $R_1 = 0.059$ , $wR_2 = 0.150$            |
| R indices (all data)                 | $R_1 = 0.065$ , $wR_2 = 0.160$            |
| Largest diff. peak and hole          | 3.49 and $-2.67 \text{ e}^-/\text{\AA}^3$ |

---

## References

[S1] Data Collection: SMART Software in APEX2 v2014.11-0 Suite. Bruker-AXS, 5465 E. Cheryl Parkway, Madison, WI 53711-5373 USA.

[S2] Data Reduction: SAINT Software in APEX2 v2014.11-0 Suite. Bruker-AXS, 5465 E. Cheryl Parkway, Madison, WI 53711-5373 USA.

[S3] Refinement: SHELXTL Software in APEX2 v2014.11-0 Suite. Bruker-AXS, 5465 E. Cheryl Parkway, Madison, WI 53711-5373 USA.

## checkCIF/PLATON report

Structure factors have been supplied for datablock(s) q63k

THIS REPORT IS FOR GUIDANCE ONLY. IF USED AS PART OF A REVIEW PROCEDURE FOR PUBLICATION, IT SHOULD NOT REPLACE THE EXPERTISE OF AN EXPERIENCED CRYSTALLOGRAPHIC REFEREE.

No syntax errors found. CIF dictionary Interpreting this report

### Datablock: q63k

Bond precision: C-C = 0.0164 A Wavelength=1.54178

Cell: a=12.3430(7) b=13.6880(8) c=20.8227(11)

alpha=105.8493(19) beta=94.109(2) gamma=113.192(2)

Temperature: 200 K

Calculated Reported

Volume 3046.2(3) 3046.2(3)

Space group P -1 P -1

Hall group -P 1 -P 1

Moiety formula C17 H26 Cl F Hg O2 Si ?

Sum formula C17 H26 Cl F Hg O2 Si C17 H26 Cl F Hg O2 Si

Mr 545.51 545.51

$D_x, g \text{ cm}^{-3}$  1.784 1.784

Z 6 6

$\mu$  (mm<sup>-1</sup>) 15.494 15.493

F000 1584.0 1584.0

F000' 1565.38

h, k, lmax 15, 16, 25 14, 16, 24

Nref 11664 10681

Tmin, Tmax 0.275, 0.427 0.364, 0.629

Tmin' 0.206

Correction method= # Reported T Limits: Tmin=0.364 Tmax=0.629  
AbsCorr = 'N  
Data completeness= 0.916 Theta(max)= 70.464  
R(reflections)= 0.0590( 9584) wR2(reflections)= 0.1600( 10681)  
S = 1.117 Npar= 640

The following ALERTS were generated. Each ALERT has the format

**test-name\_ALERT\_alert-type\_alert-level.**

Click on the hyperlinks for more details of the test.

#### Alert level B

PLAT029\_ALERT\_3\_B \_diffn\_measured\_fraction\_theta\_full value Low . 0.959 Why?

**Author Response: The crystal utilizes a low-symmetry triclinic unit cell and the data w**

PLAT971\_ALERT\_2\_B Check Calcd Resid. Dens. 1.12A From Hg1A 3.47 eA-3

**Author Response: The crystal contains several very heavy Hg atoms that strongly absorb**

PLAT971\_ALERT\_2\_B Check Calcd Resid. Dens. 1.19A From Cl1C 3.17 eA-3

**Author Response: The crystal contains several very heavy Hg atoms that strongly absorb**

PLAT971\_ALERT\_2\_B Check Calcd Resid. Dens. 0.93A From C2B 3.14 eA-3

**Author Response: The crystal contains several very heavy Hg atoms that strongly absorb**

PLAT971\_ALERT\_2\_B Check Calcd Resid. Dens. 1.04A From C2A 3.13 eA-3

**Author Response: The crystal contains several very heavy Hg atoms that strongly absorb**

PLAT971\_ALERT\_2\_B Check Calcd Resid. Dens. 0.93A From Hg1B 3.04 eA-3

**Author Response: The crystal contains several very heavy Hg atoms that strongly absorb**

PLAT971\_ALERT\_2\_B Check Calcd Resid. Dens. 1.10A From Cl1B 2.93 eA-3

**Author Response: The crystal contains several very heavy Hg atoms that strongly absorb**

PLAT971\_ALERT\_2\_B Check Calcd Resid. Dens. 0.98A From C2C 2.77 eA-3

**Author Response: The crystal contains several very heavy Hg atoms that strongly absorb**

PLAT972\_ALERT\_2\_B Check Calcd Resid. Dens. 0.84A From Hg1C -2.51 eA-3

**Author Response: The crystal contains several very heavy Hg atoms that strongly absorb**

PLAT973\_ALERT\_2\_B Check Calcd Positive Resid. Density on Hg1A 1.64 eA-3

**Author Response: The crystal contains several very heavy Hg atoms that strongly absorb**

PLAT973\_ALERT\_2\_B Check Calcd Positive Resid. Density on Hg1B 1.60 eA-3

**Author Response: The crystal contains several very heavy Hg atoms that strongly absorb**

#### Alert level C

ABSTY02\_ALERT\_1\_C An \_exptl\_absorpt\_correction\_type has been given without a literature citation. This should be contained in the \_exptl\_absorpt\_process\_details field.

Absorption correction given as numerical face-indexed

PLAT027\_ALERT\_3\_C \_diffn\_reflns\_theta\_full value (too) Low ..... 66.00 Degree

PLAT242\_ALERT\_2\_C Low 'MainMol' Ueq as Compared to Neighbors of C10A Check

PLAT242\_ALERT\_2\_C Low 'MainMol' Ueq as Compared to Neighbors of C14A Check

PLAT242\_ALERT\_2\_C Low 'MainMol' Ueq as Compared to Neighbors of C14C Check

PLAT250\_ALERT\_2\_C Large U3/U1 Ratio for Average U(i,j) Tensor ... 2.1 Note

PLAT250\_ALERT\_2\_C Large U3/U1 Ratio for Average U(i,j) Tensor ... 2.1 Note

PLAT334\_ALERT\_2\_C Small Aver. Benzene C-C Dist C4A -C9A 1.37 Ang.

PLAT334\_ALERT\_2\_C Small Aver. Benzene C-C Dist C4C -C9C 1.37 Ang.

PLAT342\_ALERT\_3\_C Low Bond Precision on C-C Bonds ..... 0.01636 Ang.

PLAT911\_ALERT\_3\_C Missing FCF Refl Between Thmin & STh/L= 0.600 556 Report

PLAT971\_ALERT\_2\_C Check Calcd Resid. Dens. 1.08A From C3A 1.83 eA-3

**Author Response: The crystal contains several very heavy Hg atoms that strongly absorb**

PLAT971\_ALERT\_2\_C Check Calcd Resid. Dens. 2.34A From Cl1B 1.59 eA-3

**Author Response: The crystal contains several very heavy Hg atoms that strongly absorb**

PLAT972\_ALERT\_2\_C Check Calcd Resid. Dens. 0.95A From Hg1B -2.50 eA-3

**Author Response: The crystal contains several very heavy Hg atoms that strongly absorb**

PLAT972\_ALERT\_2\_C Check Calcd Resid. Dens. 0.92A From Hg1A -2.47 eA-3

**Author Response: The crystal contains several very heavy Hg atoms that strongly absorb**

PLAT972\_ALERT\_2\_C Check Calcd Resid. Dens. 0.90A From Hg1A -2.20 eA-3

**Author Response: The crystal contains several very heavy Hg atoms that strongly absorb**

PLAT972\_ALERT\_2\_C Check Calcd Resid. Dens. 0.82A From Hg1C -2.17 eA-3

**Author Response: The crystal contains several very heavy Hg atoms that strongly absorb**  
PLAT972\_ALERT\_2\_C Check Calcd Resid. Dens. 0.84A From Hg1C -2.07 eA-3

**Author Response: The crystal contains several very heavy Hg atoms that strongly absorb**  
PLAT972\_ALERT\_2\_C Check Calcd Resid. Dens. 0.72A From Hg1B -2.05 eA-3

**Author Response: The crystal contains several very heavy Hg atoms that strongly absorb**  
PLAT972\_ALERT\_2\_C Check Calcd Resid. Dens. 0.97A From Hg1B -2.05 eA-3

**Author Response: The crystal contains several very heavy Hg atoms that strongly absorb**  
PLAT972\_ALERT\_2\_C Check Calcd Resid. Dens. 0.95A From Hg1A -2.04 eA-3

**Author Response: The crystal contains several very heavy Hg atoms that strongly absorb**  
PLAT972\_ALERT\_2\_C Check Calcd Resid. Dens. 0.77A From Hg1A -1.98 eA-3

**Author Response: The crystal contains several very heavy Hg atoms that strongly absorb**  
PLAT972\_ALERT\_2\_C Check Calcd Resid. Dens. 0.53A From Hg1C -1.93 eA-3

**Author Response: The crystal contains several very heavy Hg atoms that strongly absorb**  
PLAT972\_ALERT\_2\_C Check Calcd Resid. Dens. 1.26A From Hg1C -1.87 eA-3

**Author Response: The crystal contains several very heavy Hg atoms that strongly absorb**  
PLAT972\_ALERT\_2\_C Check Calcd Resid. Dens. 0.69A From Hg1C -1.66 eA-3

**Author Response: The crystal contains several very heavy Hg atoms that strongly absorb**  
PLAT972\_ALERT\_2\_C Check Calcd Resid. Dens. 0.72A From Hg1B -1.63 eA-3

**Author Response: The crystal contains several very heavy Hg atoms that strongly absorb**  
PLAT972\_ALERT\_2\_C Check Calcd Resid. Dens. 1.85A From Hg1B -1.57 eA-3

**Author Response: The crystal contains several very heavy Hg atoms that strongly absorb**  
PLAT972\_ALERT\_2\_C Check Calcd Resid. Dens. 1.83A From Hg1B -1.54 eA-3

**Author Response: The crystal contains several very heavy Hg atoms that strongly absorb**  
PLAT972\_ALERT\_2\_C Check Calcd Resid. Dens. 0.72A From Hg1A -1.52 eA-3

**Author Response: The crystal contains several very heavy Hg atoms that strongly absorb**  
PLAT972\_ALERT\_2\_C Check Calcd Resid. Dens. 1.75A From Cl1A -1.51 eA-3

**Author Response: The crystal contains several very heavy Hg atoms that strongly absorb**  
PLAT973\_ALERT\_2\_C Check Calcd Positive Resid. Density on Hg1C 1.44 eA-3

**Author Response: The crystal contains several very heavy Hg atoms that strongly absorb**  
PLAT977\_ALERT\_2\_C Check Negative Difference Density on H8AA -0.52 eA-3  
PLAT977\_ALERT\_2\_C Check Negative Difference Density on H1BA -0.36 eA-3  
PLAT977\_ALERT\_2\_C Check Negative Difference Density on H5BA -0.36 eA-3  
PLAT977\_ALERT\_2\_C Check Negative Difference Density on H2CA -0.79 eA-3  
PLAT977\_ALERT\_2\_C Check Negative Difference Density on H5CA -0.43 eA-3

#### **Alert level G**

ABSTY01\_ALERT\_1\_G Extra text has been found in the \_exptl\_absorpt\_correction\_type field, which should be only a single keyword. A literature citation should be included in the \_exptl\_absorpt\_process\_details field.

PLAT083\_ALERT\_2\_G SHELXL Second Parameter in WGHT Unusually Large 14.48 Why ?  
PLAT720\_ALERT\_4\_G Number of Unusual/Non-Standard Labels ..... 24 Note  
PLAT793\_ALERT\_4\_G Model has Chirality at C2A (Centro SPGR) R Verify  
PLAT793\_ALERT\_4\_G Model has Chirality at C2B (Centro SPGR) R Verify  
PLAT793\_ALERT\_4\_G Model has Chirality at C2C (Centro SPGR) S Verify  
PLAT793\_ALERT\_4\_G Model has Chirality at C3A (Centro SPGR) S Verify  
PLAT793\_ALERT\_4\_G Model has Chirality at C3B (Centro SPGR) S Verify  
PLAT793\_ALERT\_4\_G Model has Chirality at C3C (Centro SPGR) R Verify  
PLAT802\_ALERT\_4\_G CIF Input Record(s) with more than 80 Characters 4 Info  
PLAT883\_ALERT\_1\_G No Info/Value for \_atom\_sites\_solution\_primary . Please Do !  
PLAT912\_ALERT\_4\_G Missing # of FCF Reflections Above STh/L= 0.600 389 Note  
PLAT941\_ALERT\_3\_G Average HKL Measurement Multiplicity ..... 3.8 Low  
PLAT965\_ALERT\_2\_G The SHELXL WEIGHT Optimisation has not Converged Please Check  
PLAT978\_ALERT\_2\_G Number C-C Bonds with Positive Residual Density. 0 Info  
0 **ALERT level A** = Most likely a serious problem - resolve or explain  
11 **ALERT level B** = A potentially serious problem, consider carefully  
36 **ALERT level C** = Check. Ensure it is not caused by an omission or oversight  
15 **ALERT level G** = General information/check it is not something unexpected  
3 ALERT type 1 CIF construction/syntax error, inconsistent or missing data  
45 ALERT type 2 Indicator that the structure model may be wrong or deficient

5 ALERT type 3 Indicator that the structure quality may be low  
9 ALERT type 4 Improvement, methodology, query or suggestion  
0 ALERT type 5 Informative message, check

# IX. NMR Spectra

Compound 1 ( <sup>1</sup>H NMR: 400 MHz, <sup>13</sup>C NMR: 100 MHz)

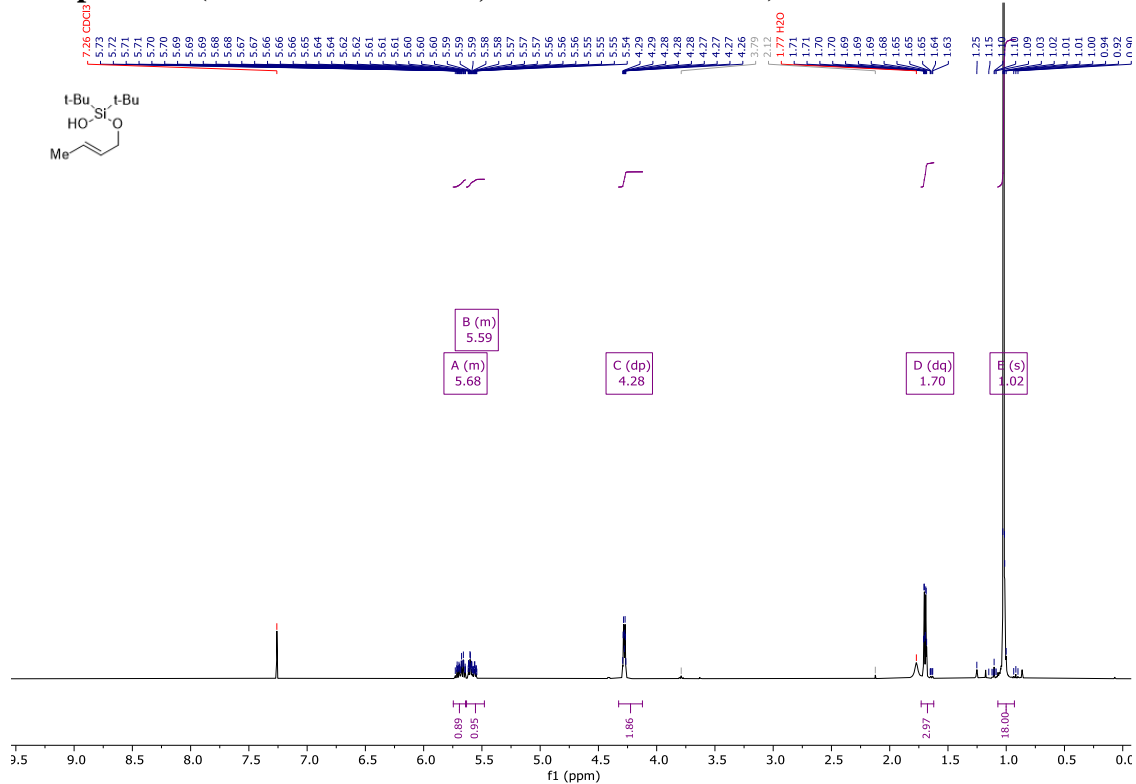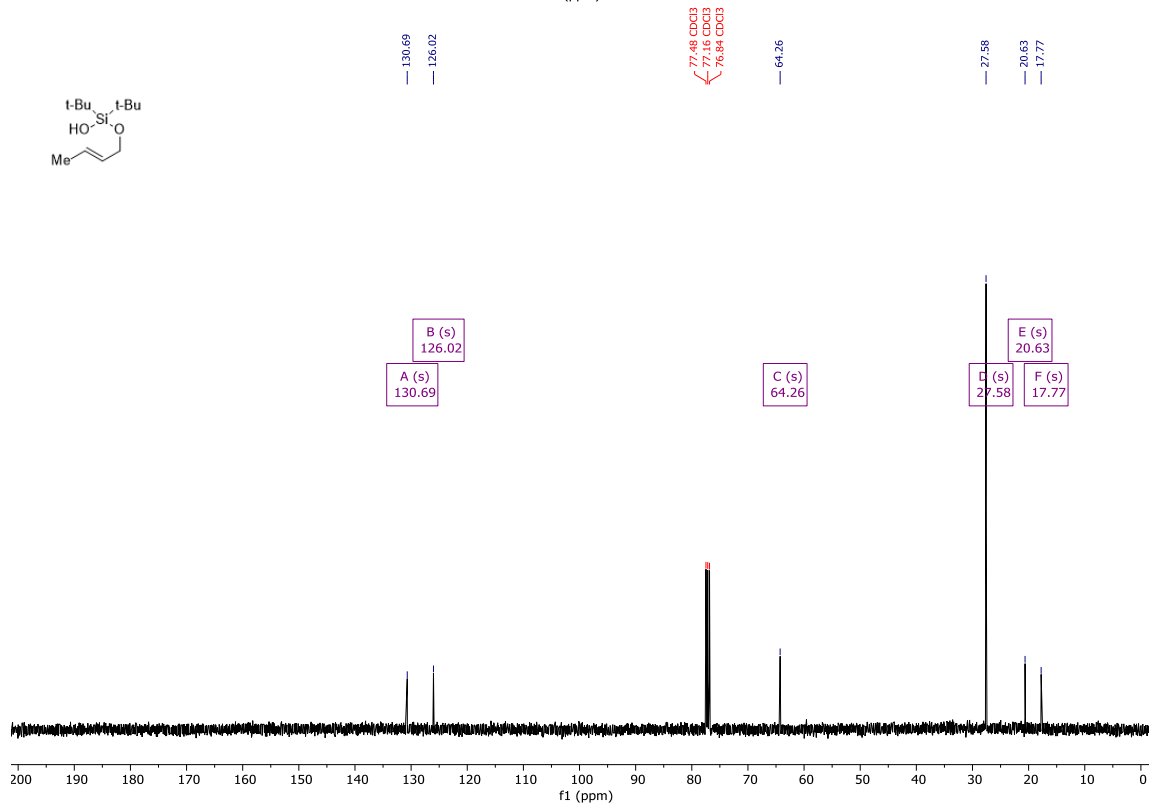

Compound 2 (  $^1\text{H}$  NMR: 400 MHz,  $^{13}\text{C}$  NMR: 100 MHz)

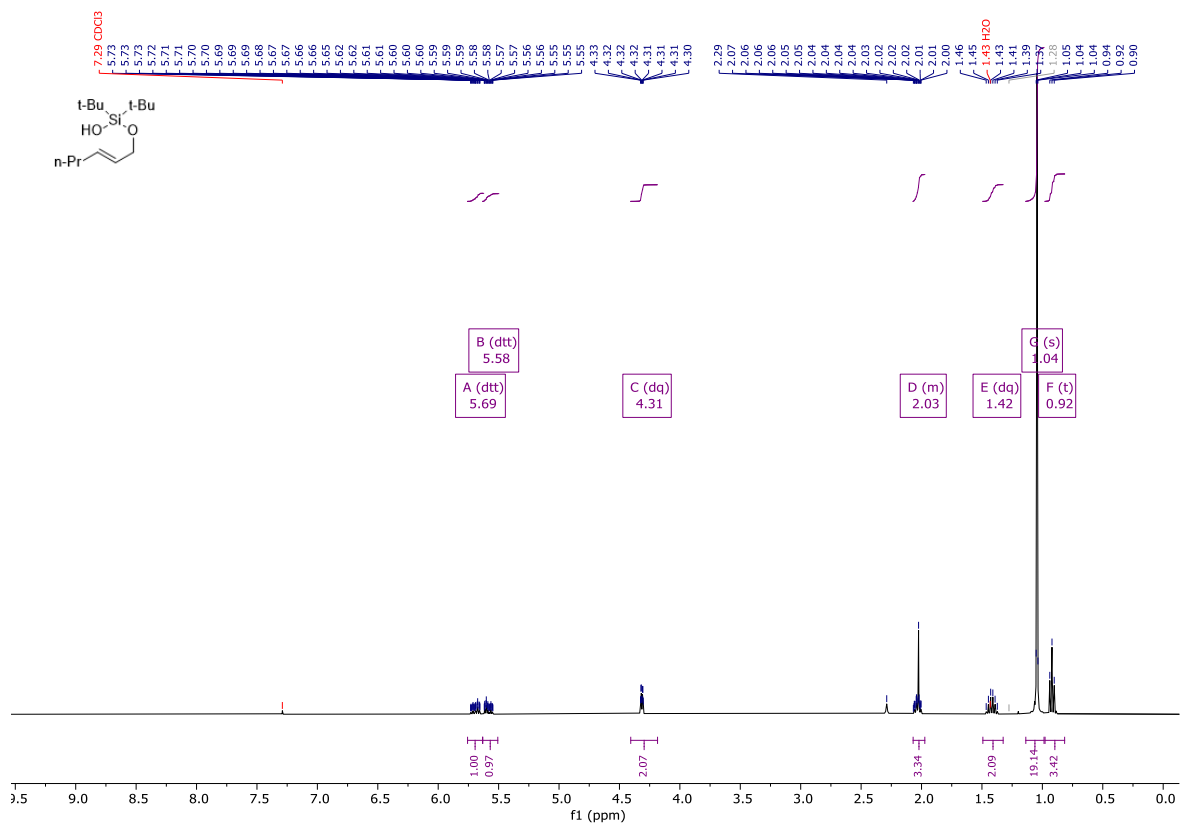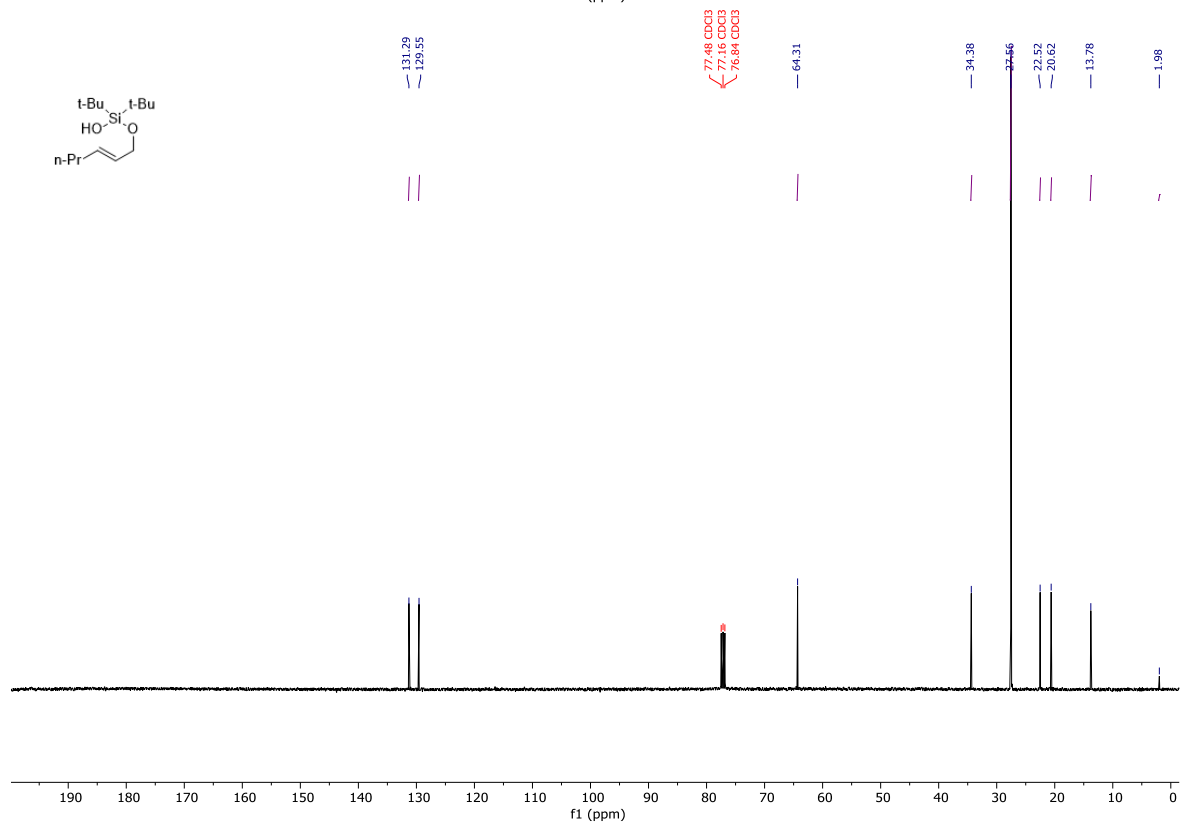



**Compound 3 ( <sup>1</sup>H NMR: 400 MHz, <sup>13</sup>C NMR: 100 MHz)**

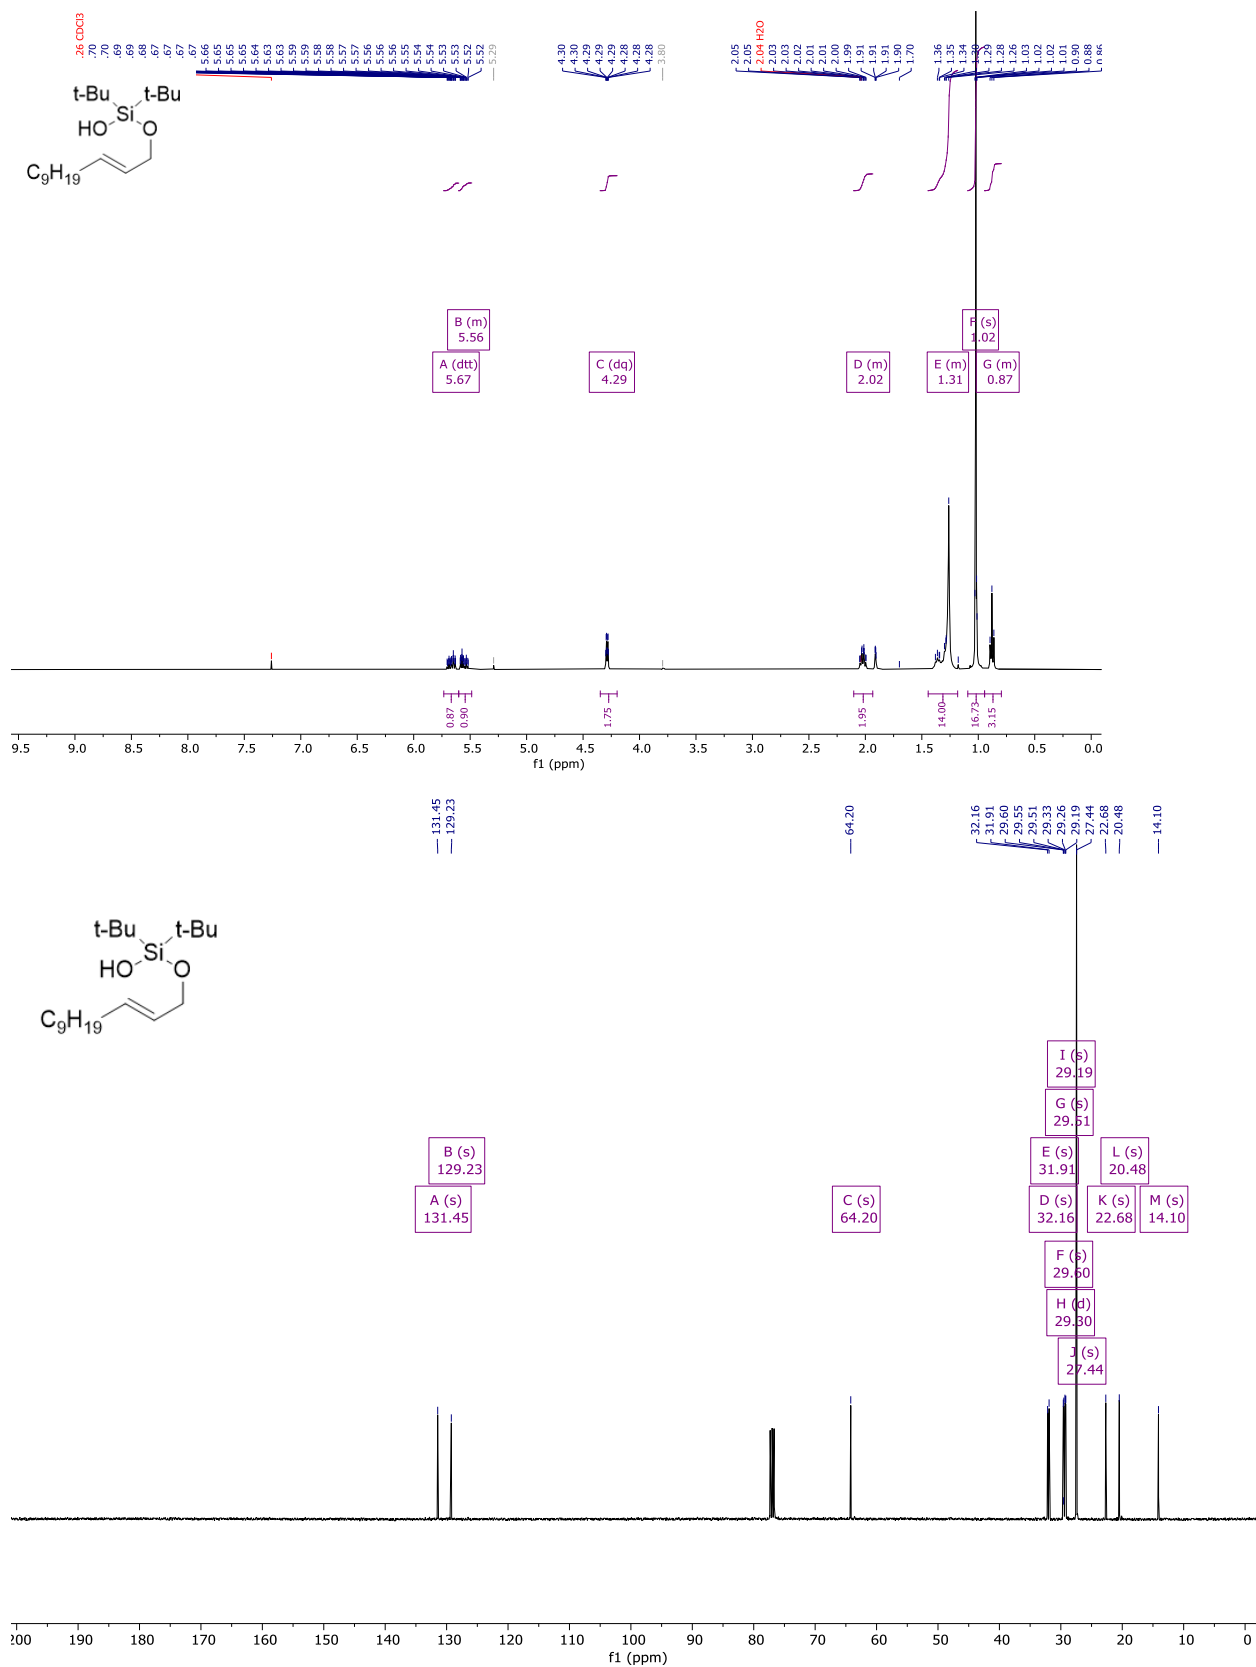

Compound 4 (  $^1\text{H}$  NMR: 400 MHz,  $^{13}\text{C}$  NMR: 100 MHz)

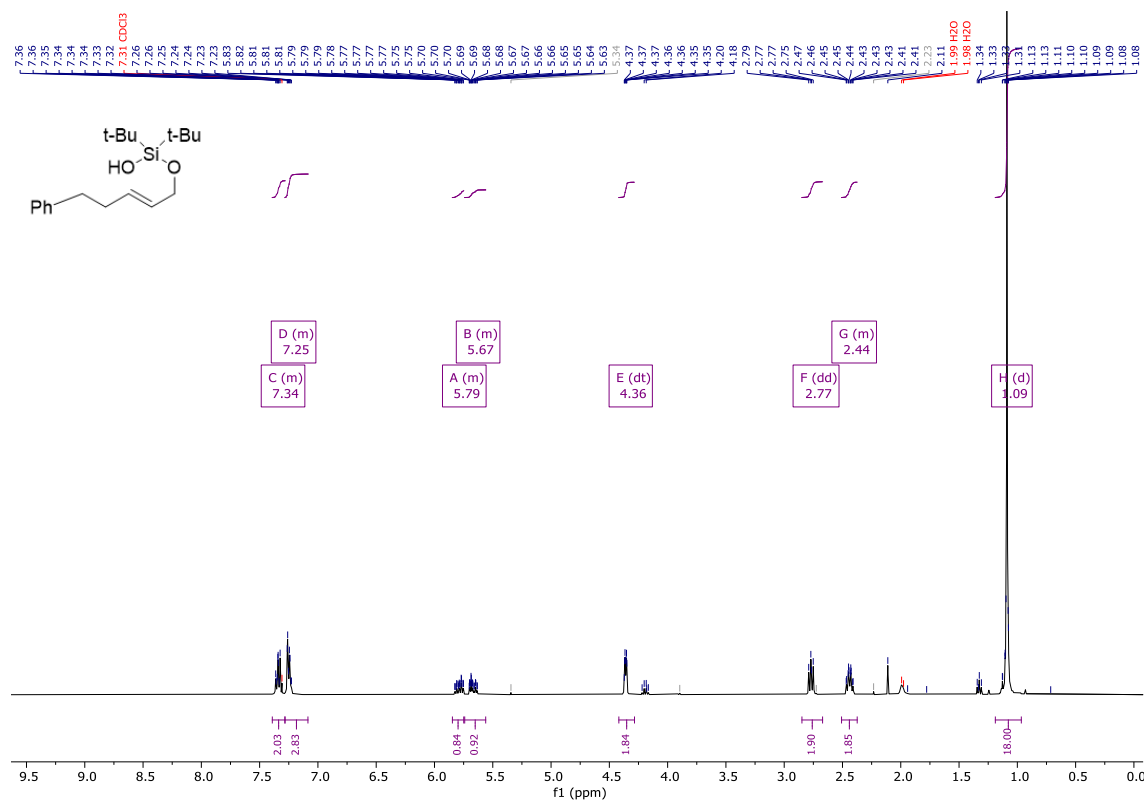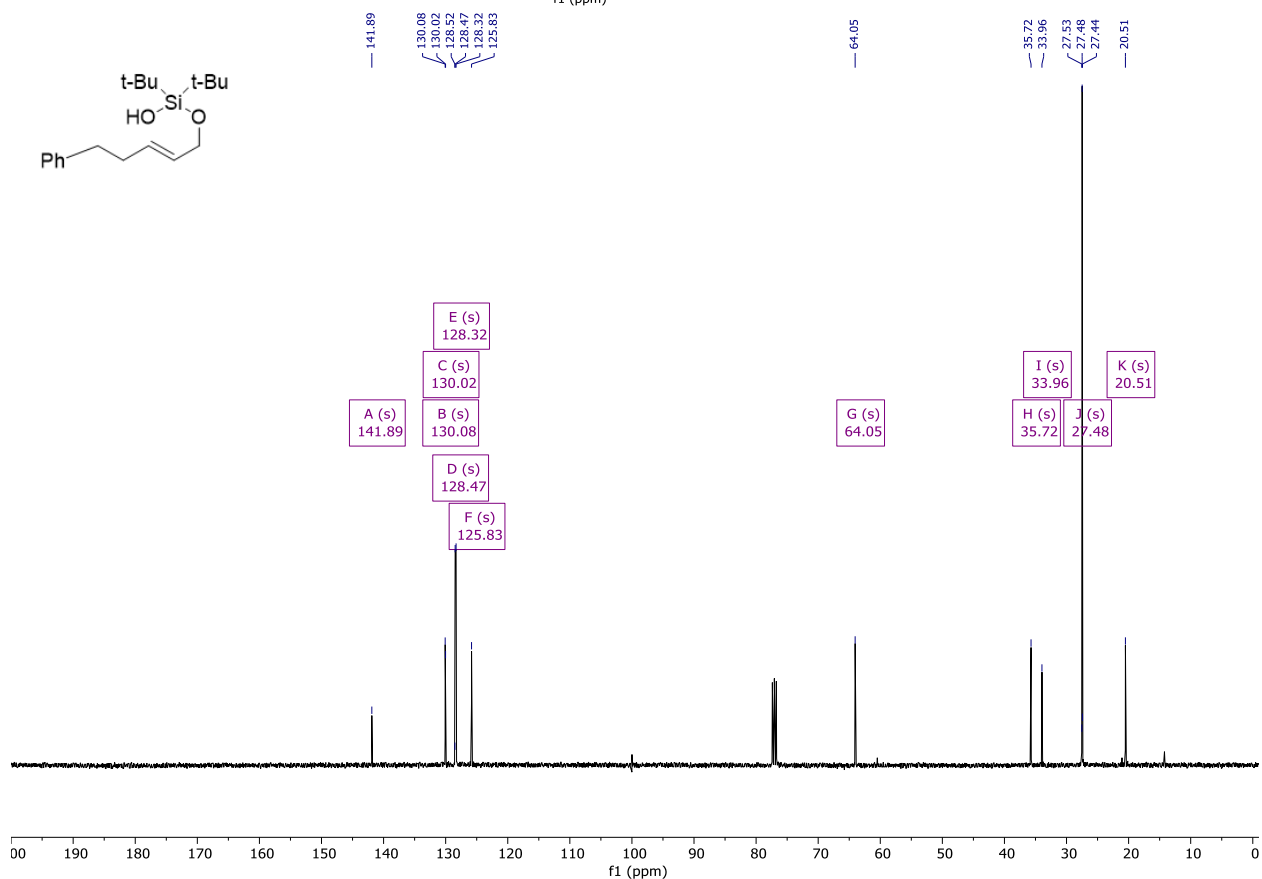

# Compound 5 ( $^1\text{H}$ NMR: 400 MHz, $^{13}\text{C}$ NMR: 100 MHz)

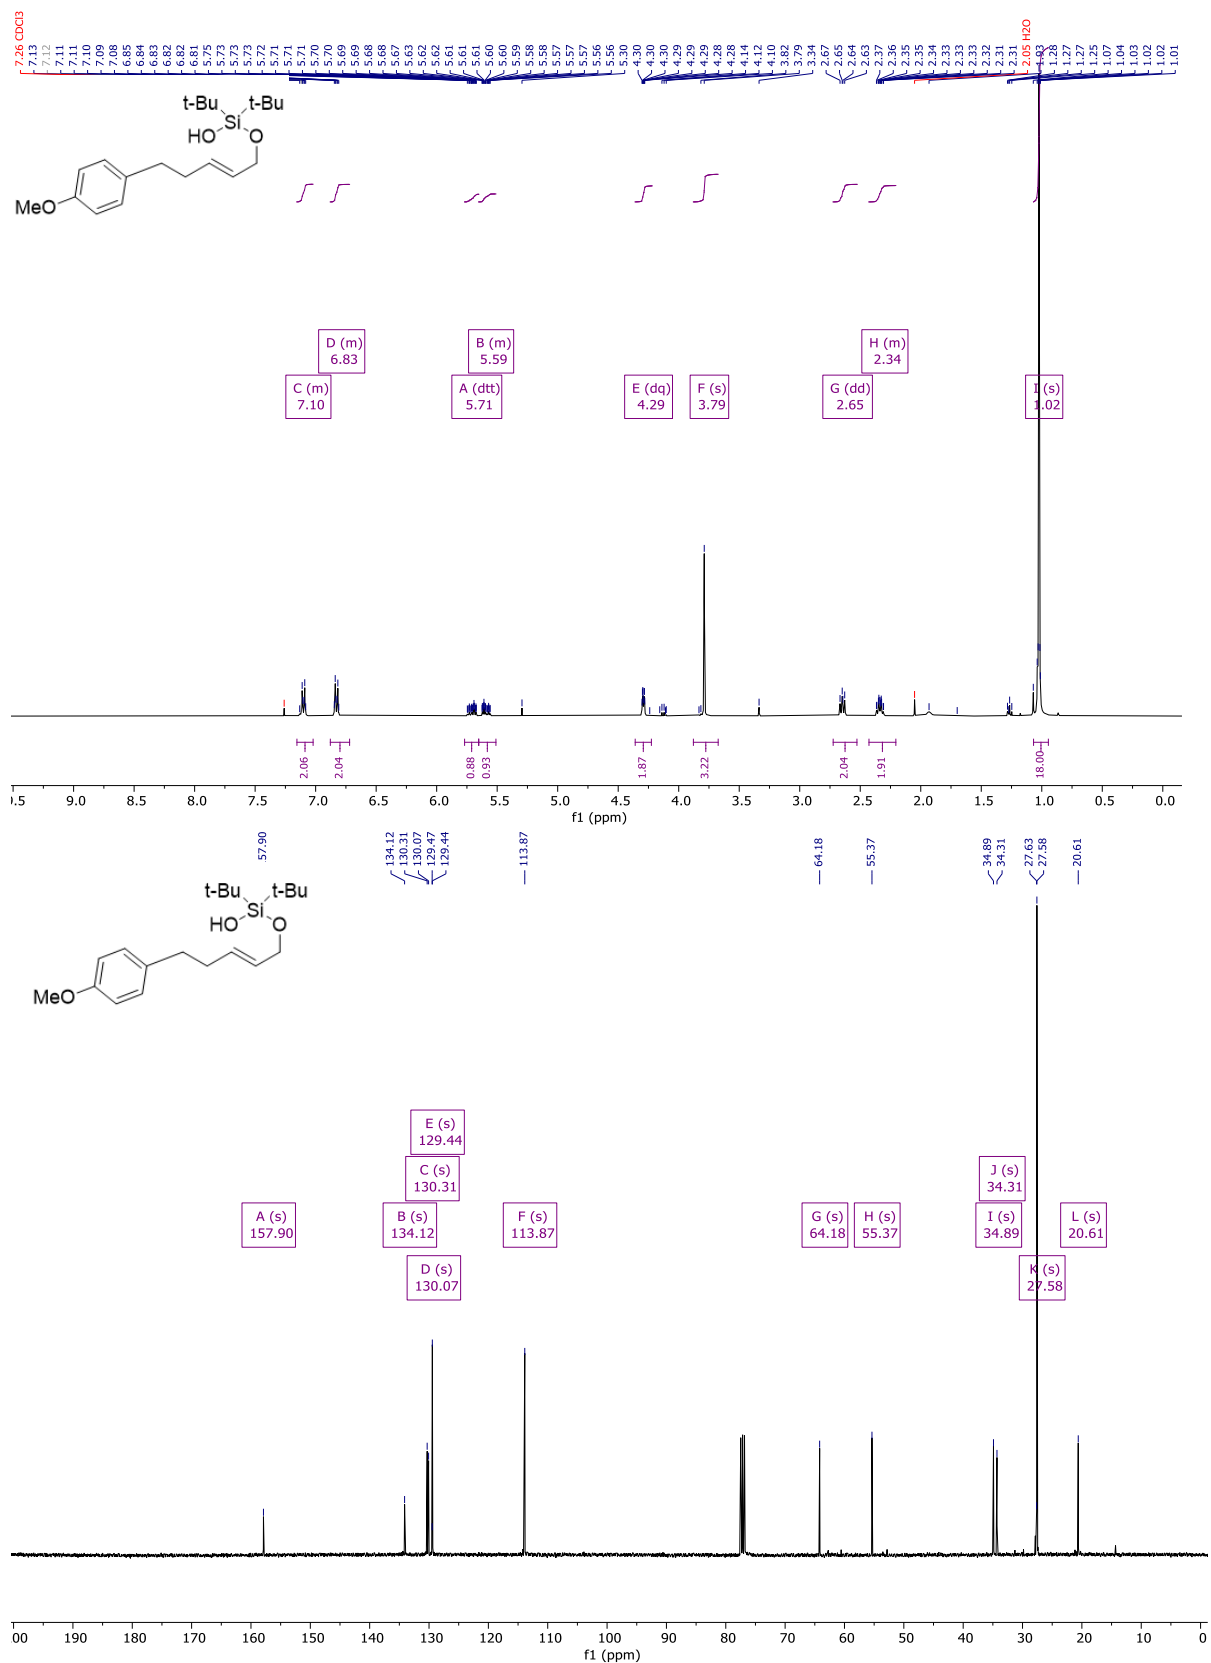

**Compound 6 ( <sup>1</sup>H NMR: 400 MHz, <sup>13</sup>C NMR: 100 MHz)**

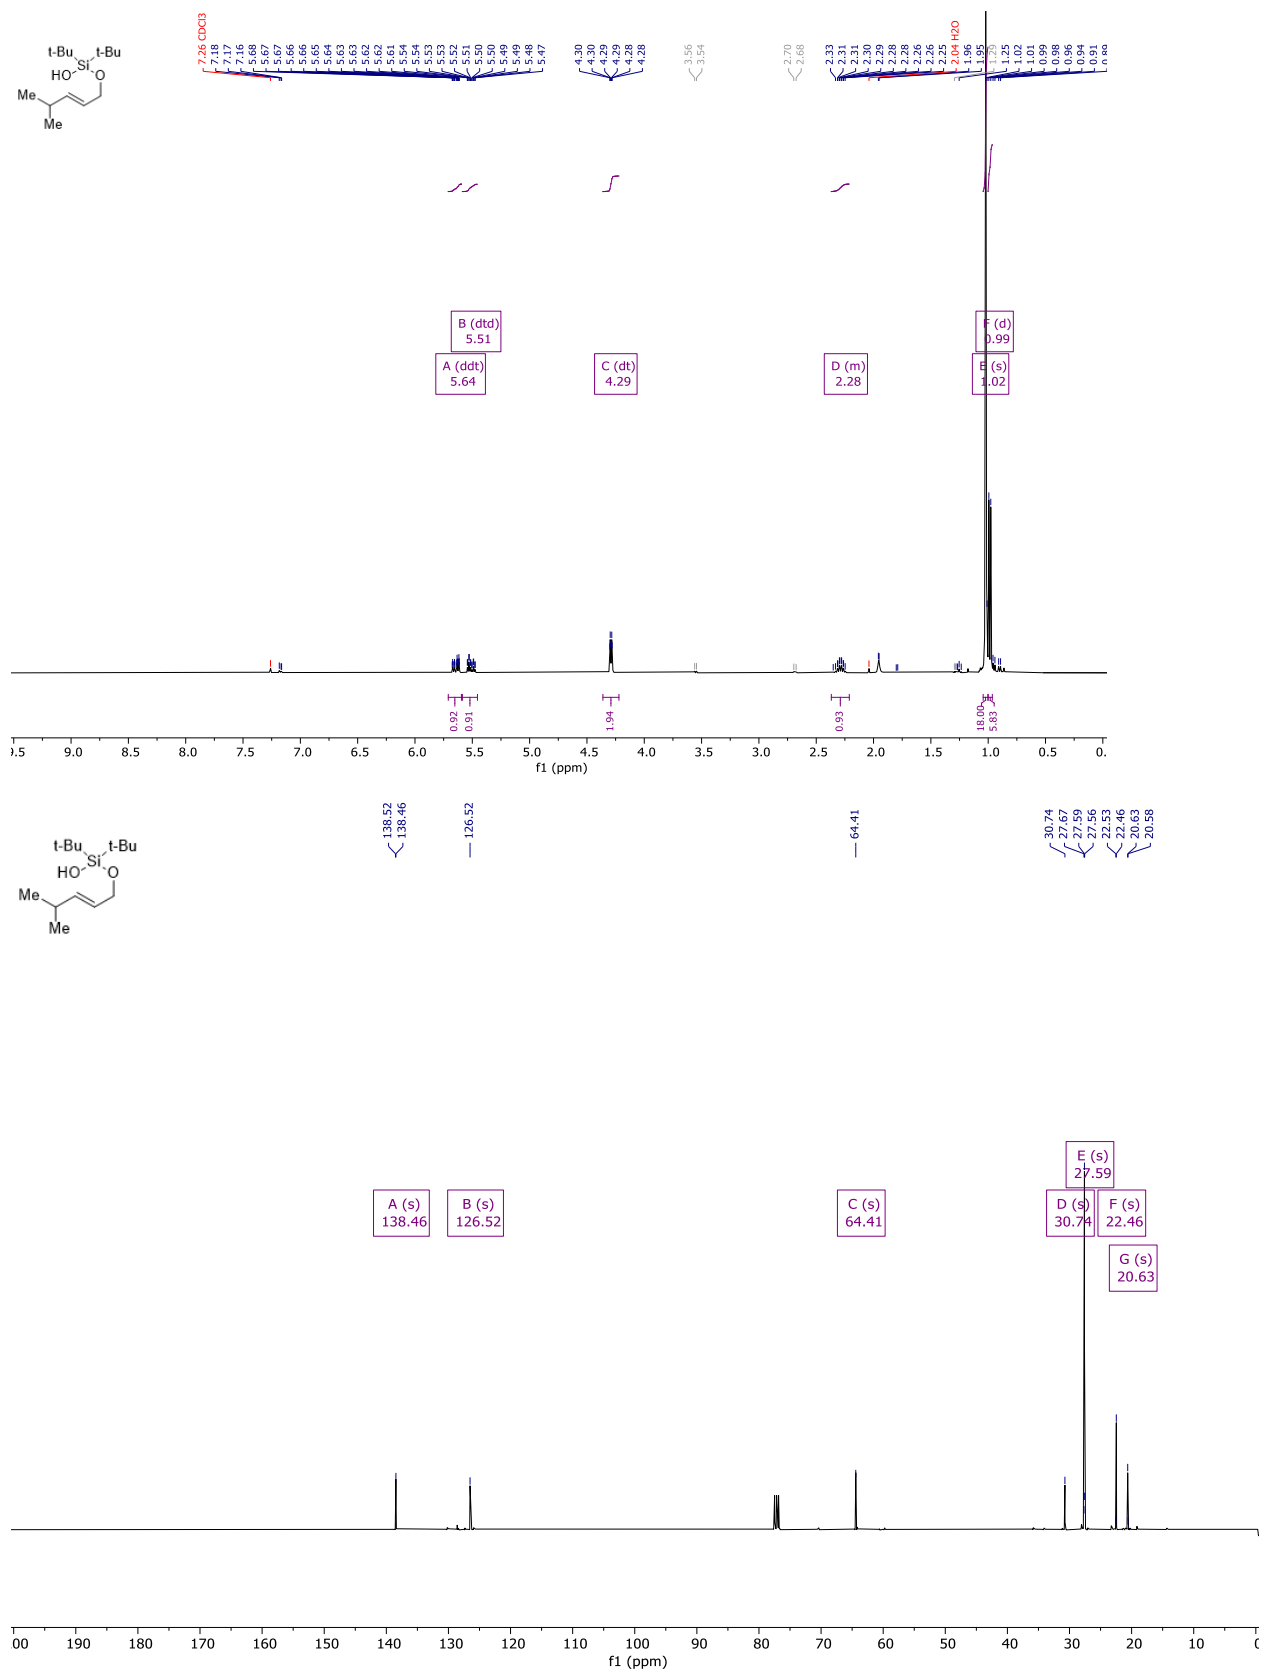

Compound 7 ( <sup>1</sup>H NMR: 400 MHz, <sup>13</sup>C NMR: 100 MHz)

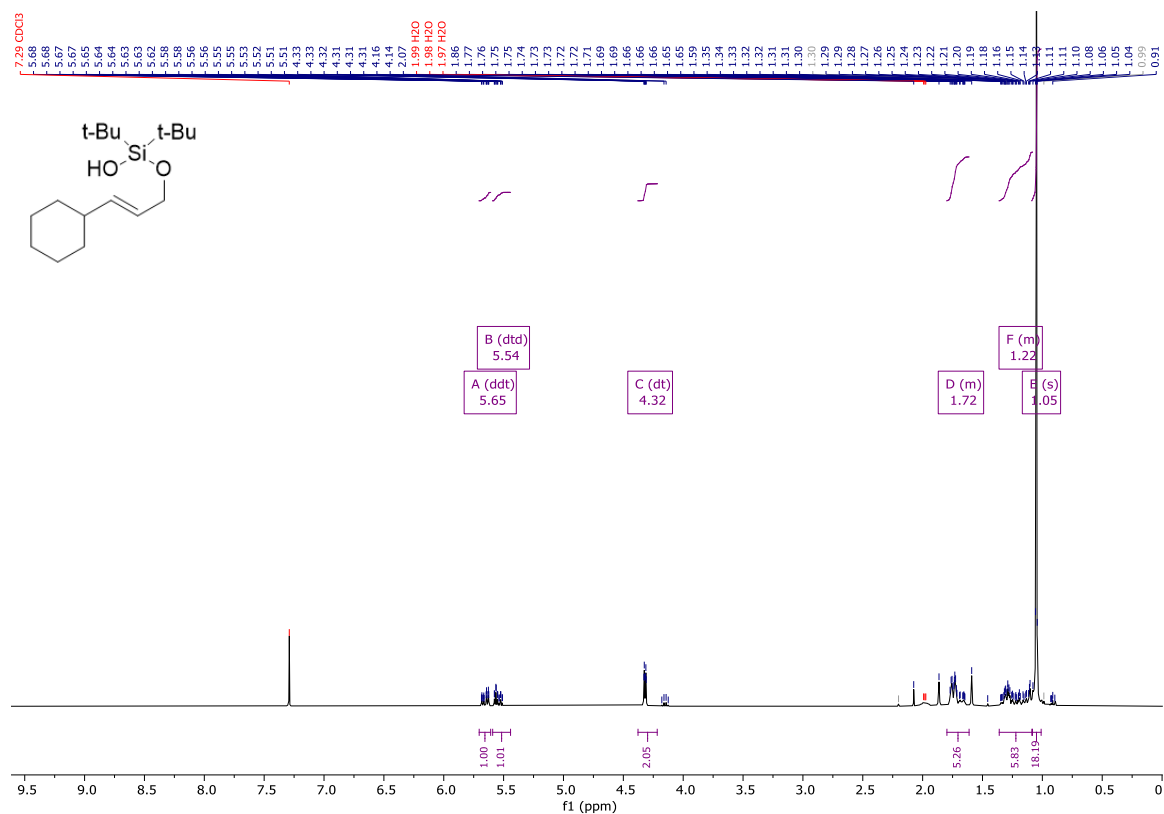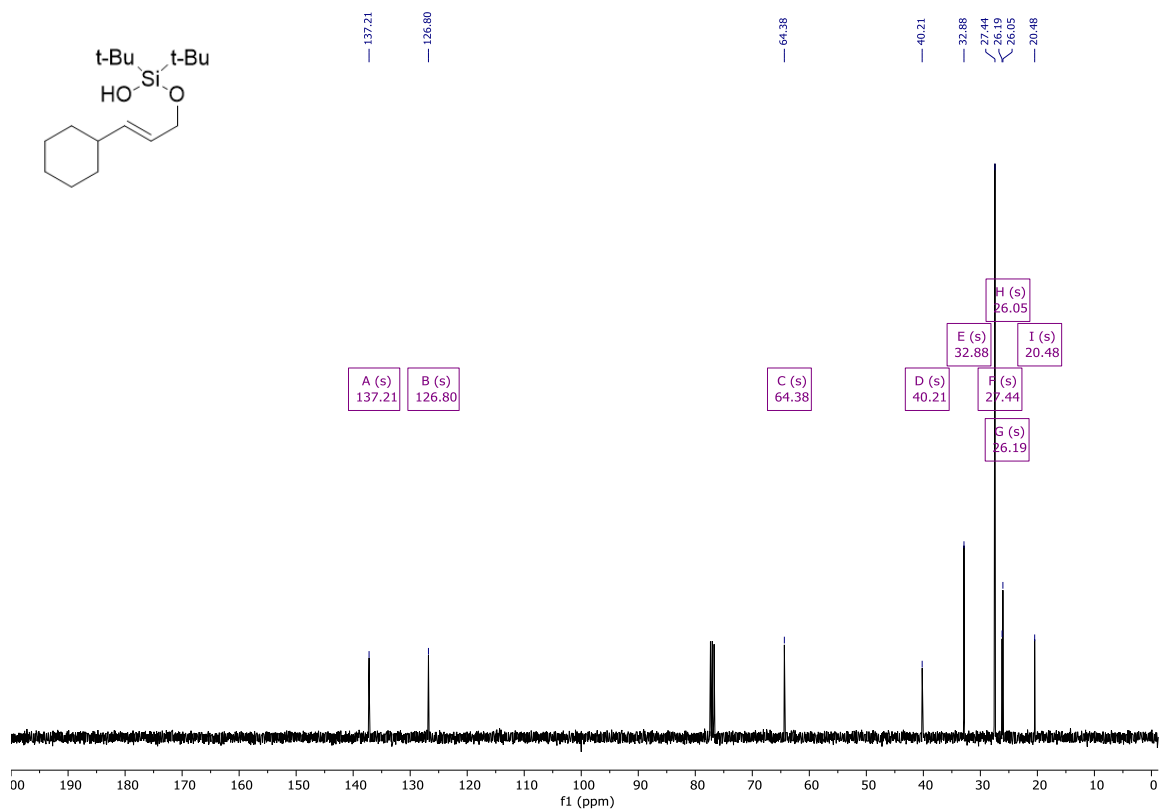

Compound 8 (  $^1\text{H}$  NMR: 400 MHz,  $^{13}\text{C}$  NMR: 100 MHz)

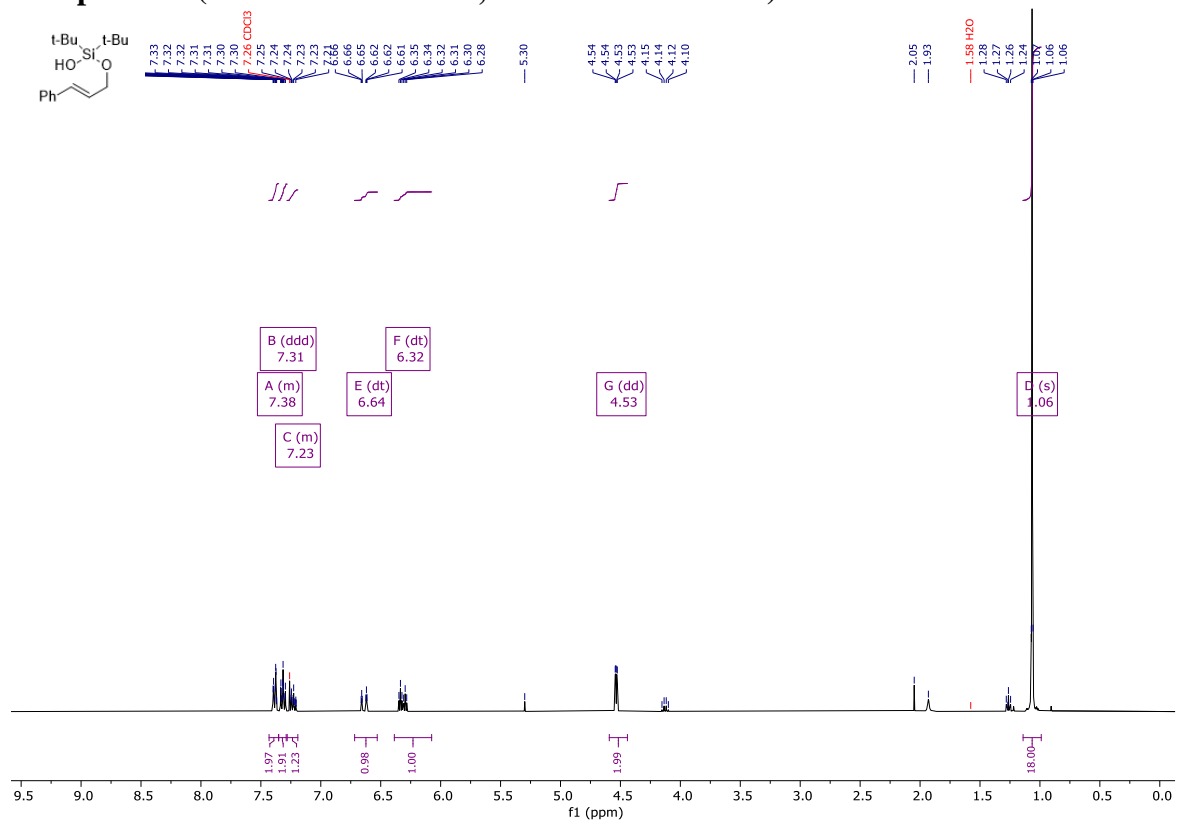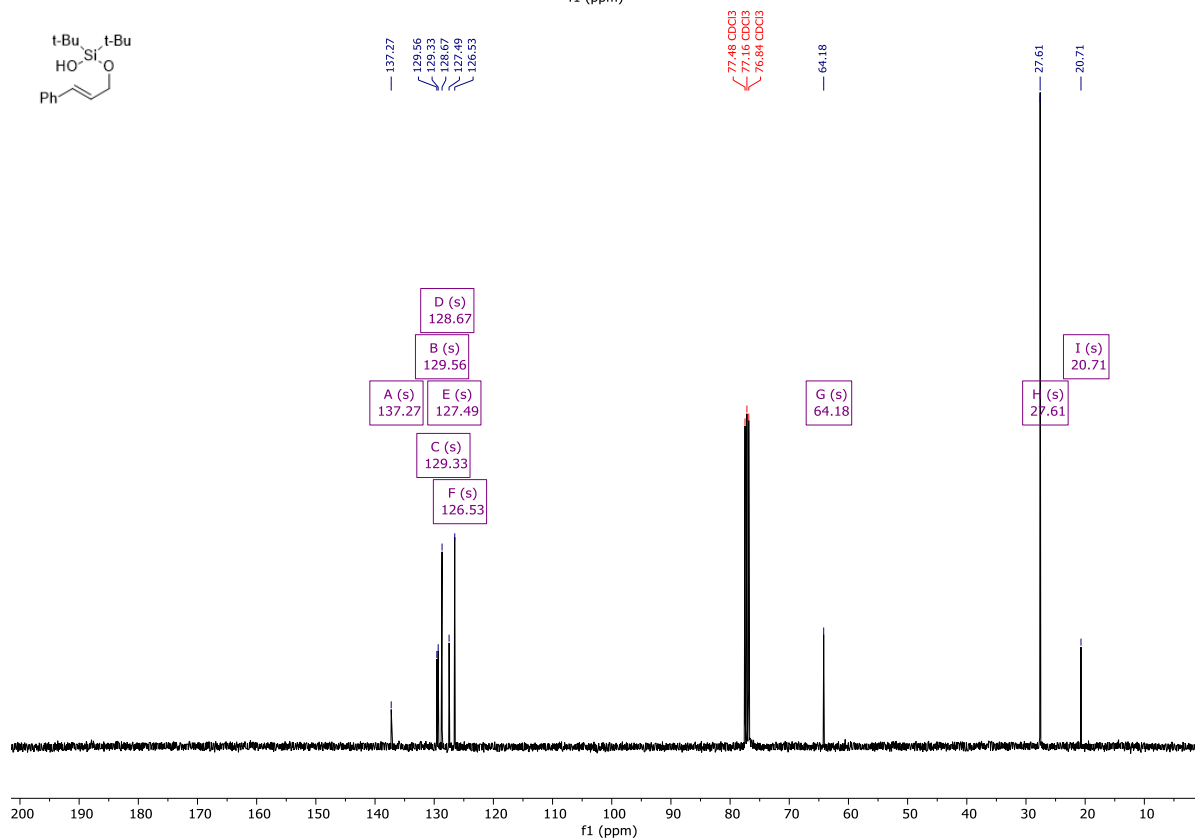

Compound 9 (<sup>1</sup>H NMR: 400 MHz, <sup>13</sup>C NMR: 100 MHz)

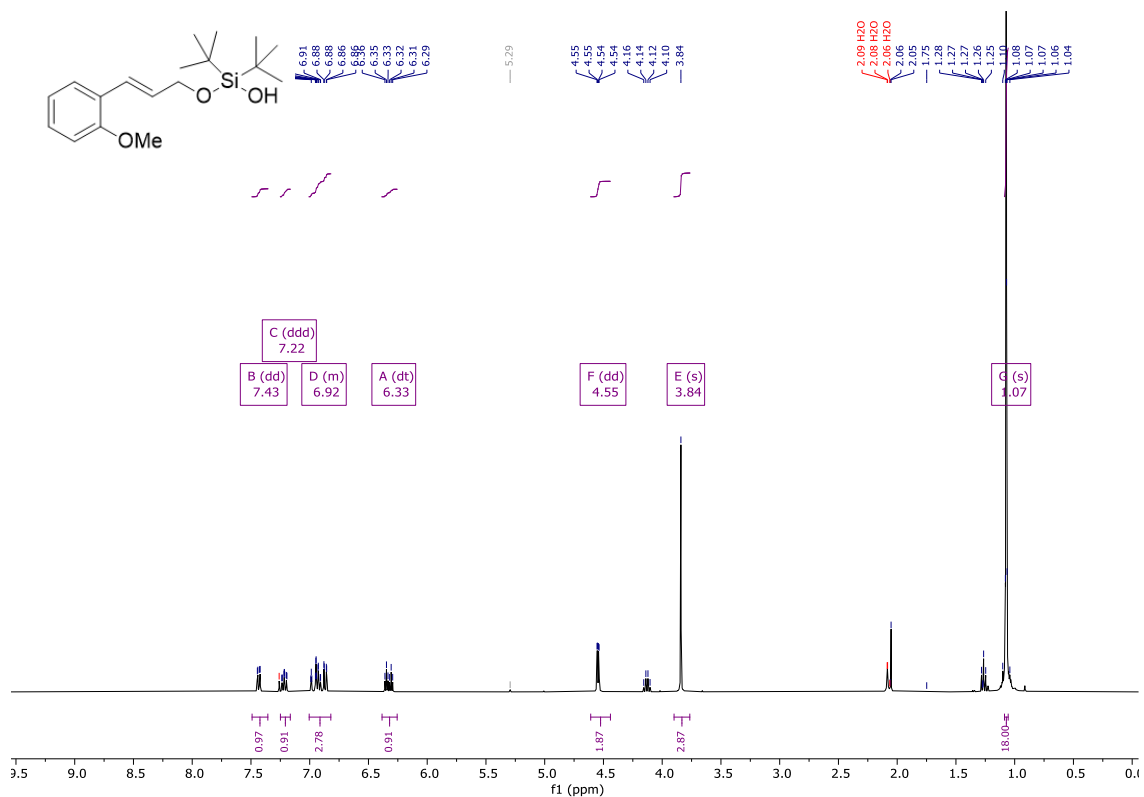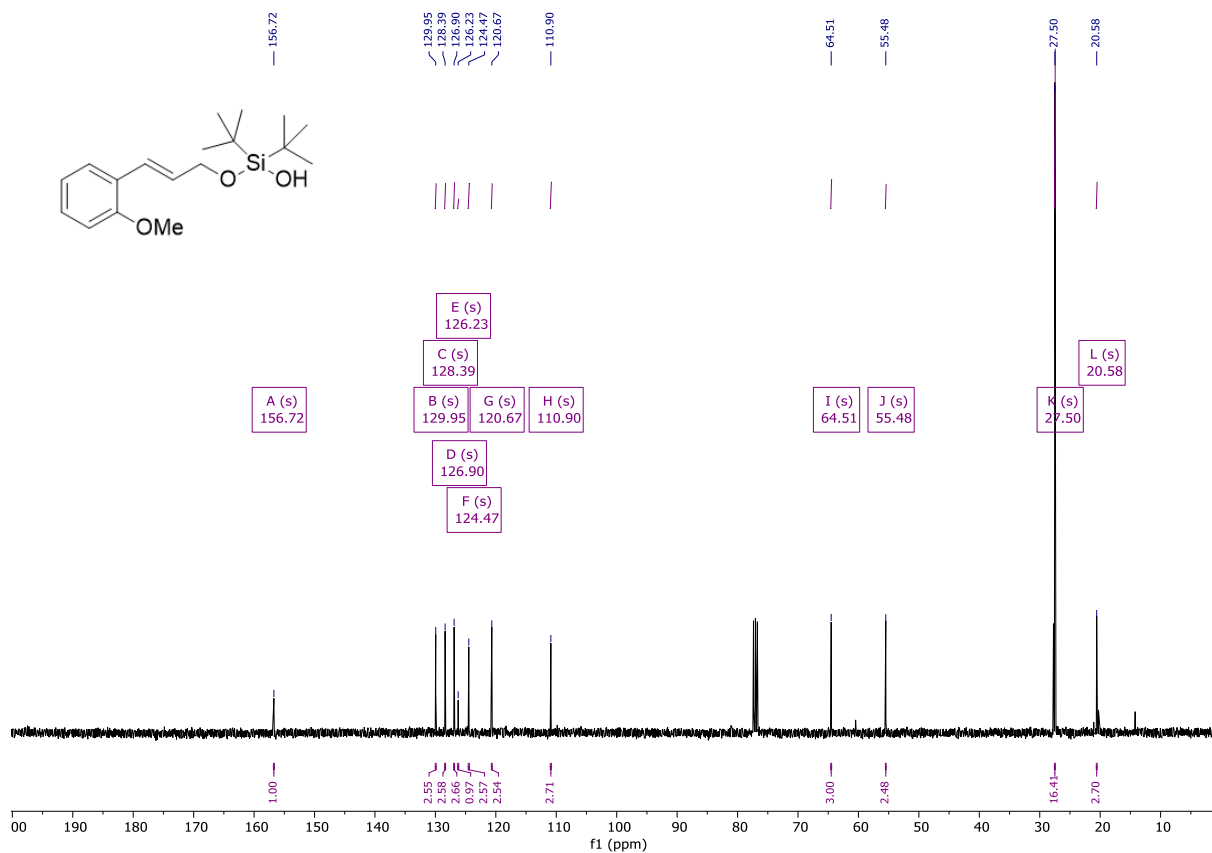

Compound 10 ( $^1\text{H}$  NMR: 400 MHz,  $^{13}\text{C}$  NMR: 100 MHz)

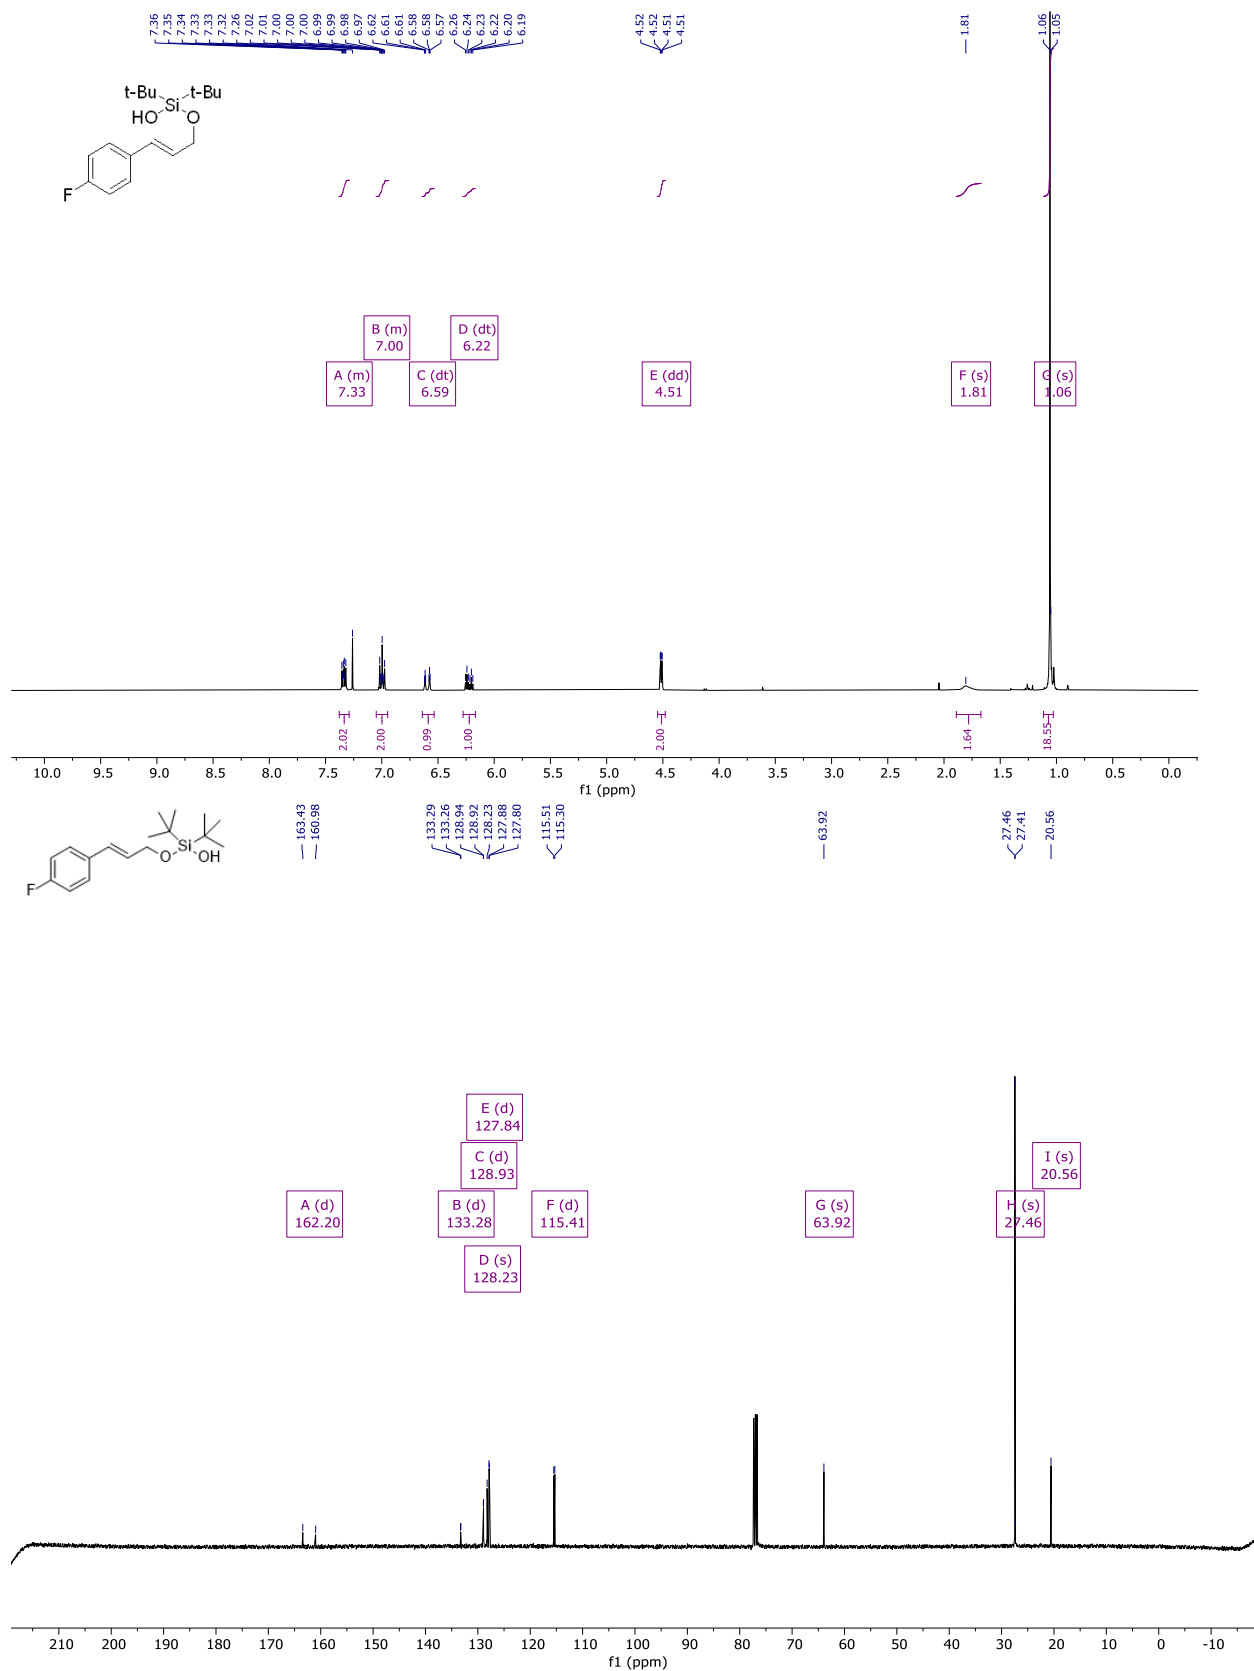



Compound 11 ( $^1\text{H}$  NMR: 400 MHz,  $^{13}\text{C}$  NMR: 100 MHz)

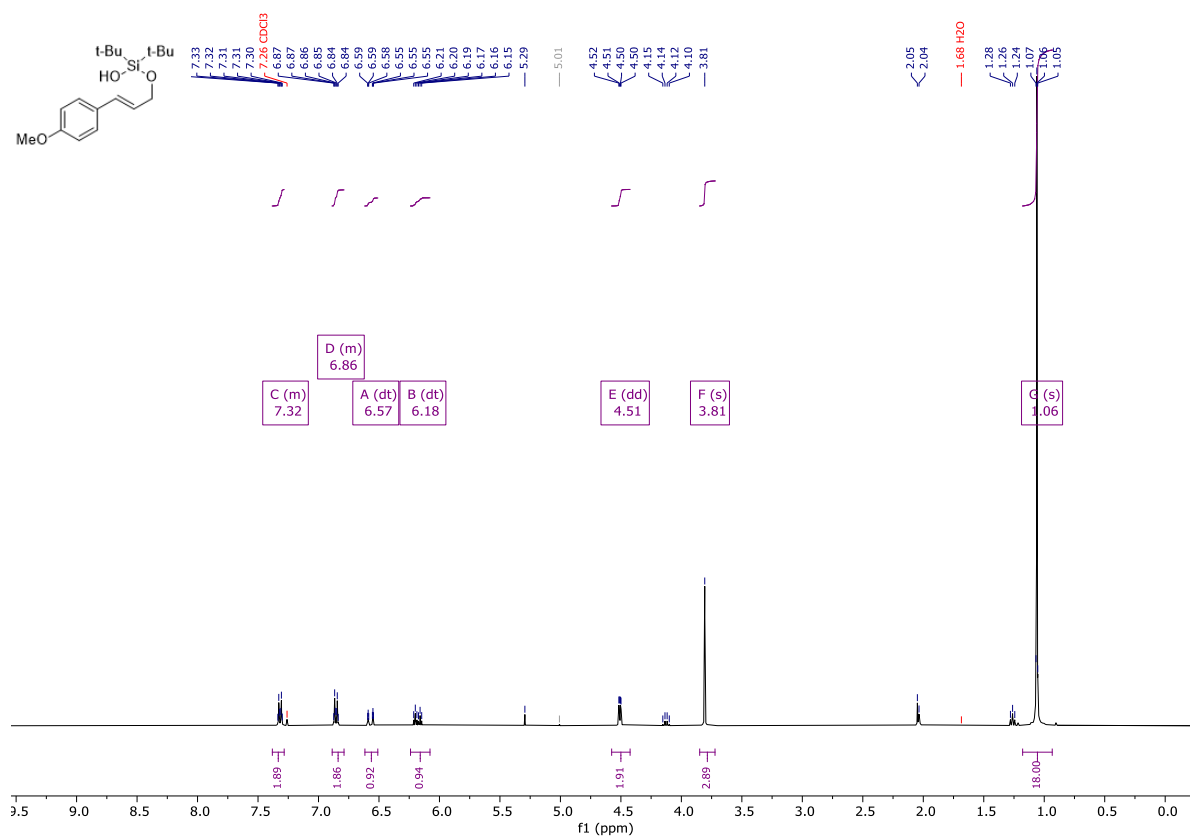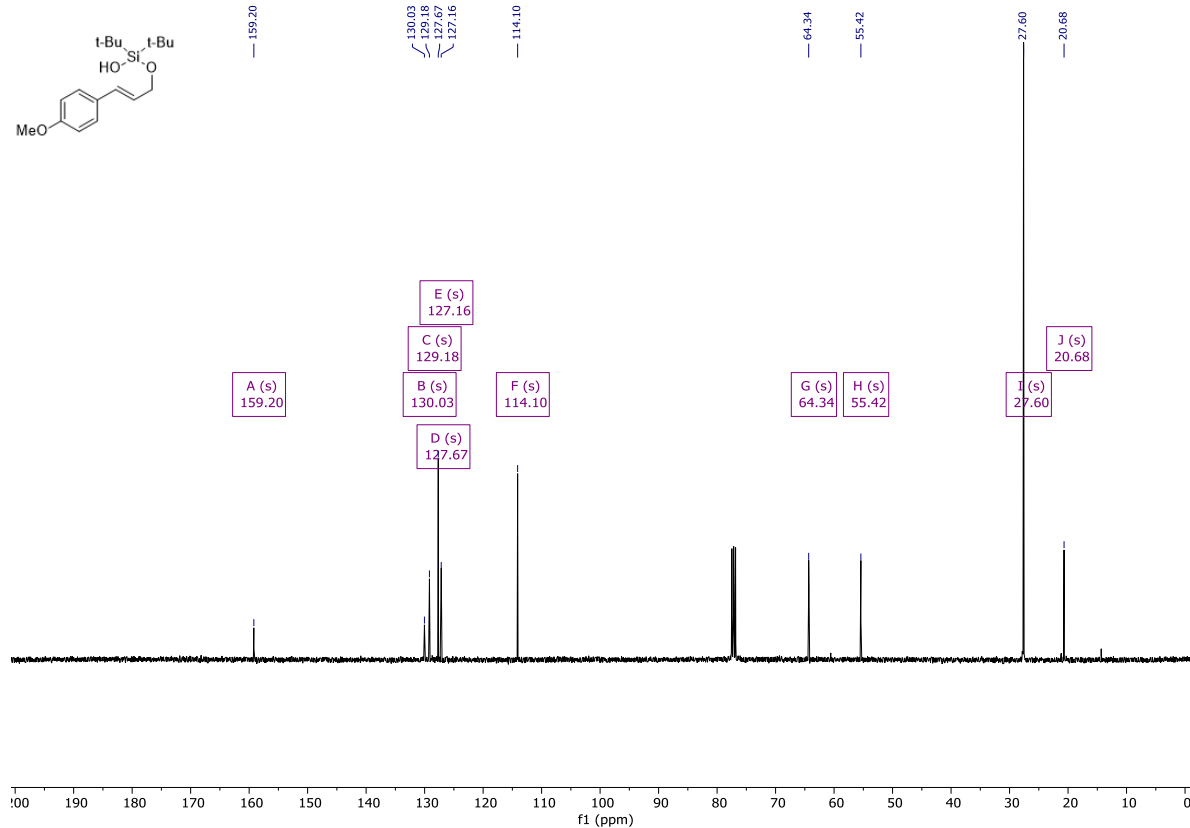

Compound 12 ( $^1\text{H NMR}$ : 400 MHz,  $^{13}\text{C NMR}$ : 100 MHz)

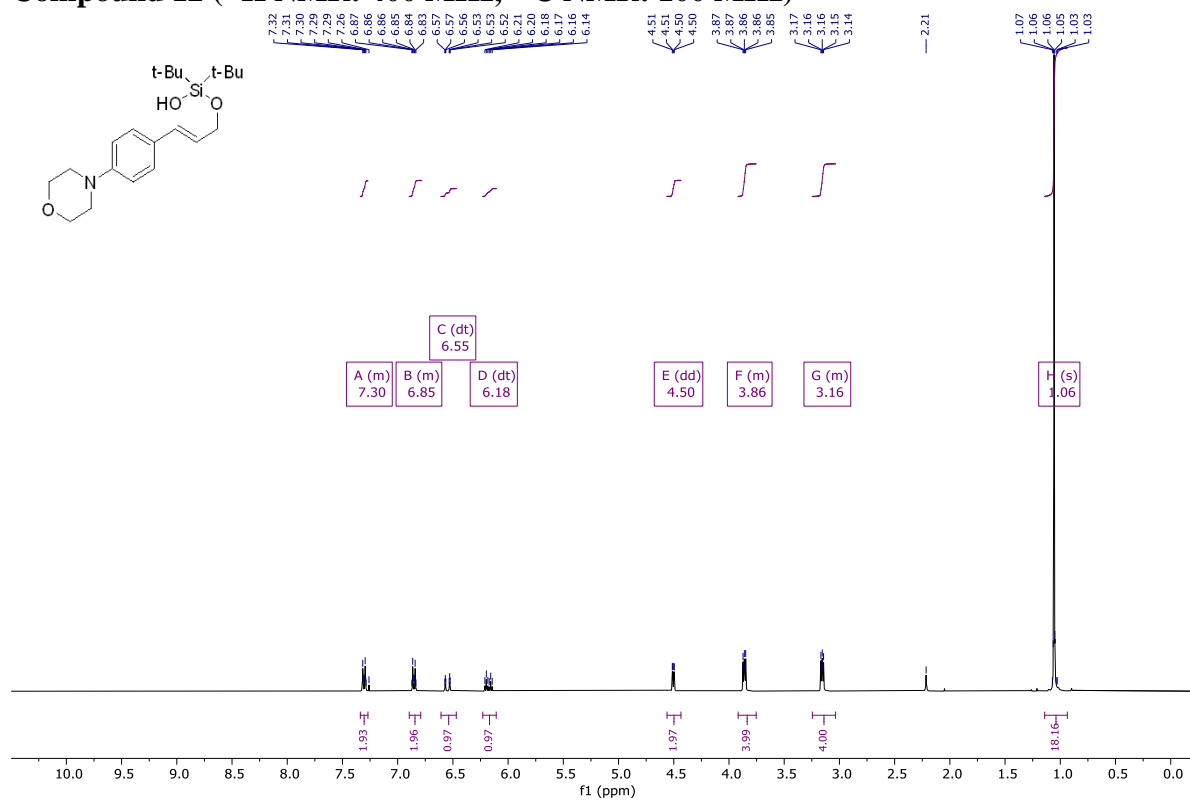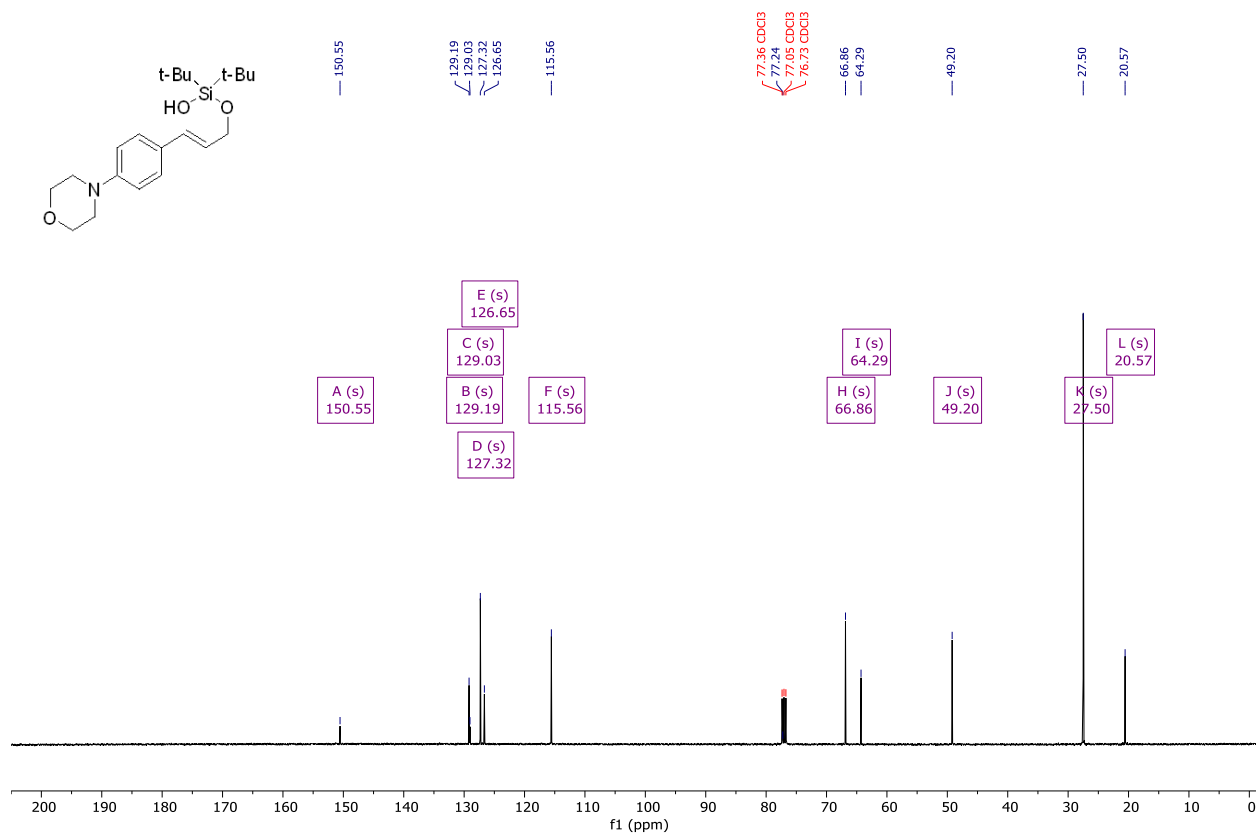

Compound 13 ( $^1\text{H}$  NMR: 400 MHz,  $^{13}\text{C}$  NMR: 100 MHz)

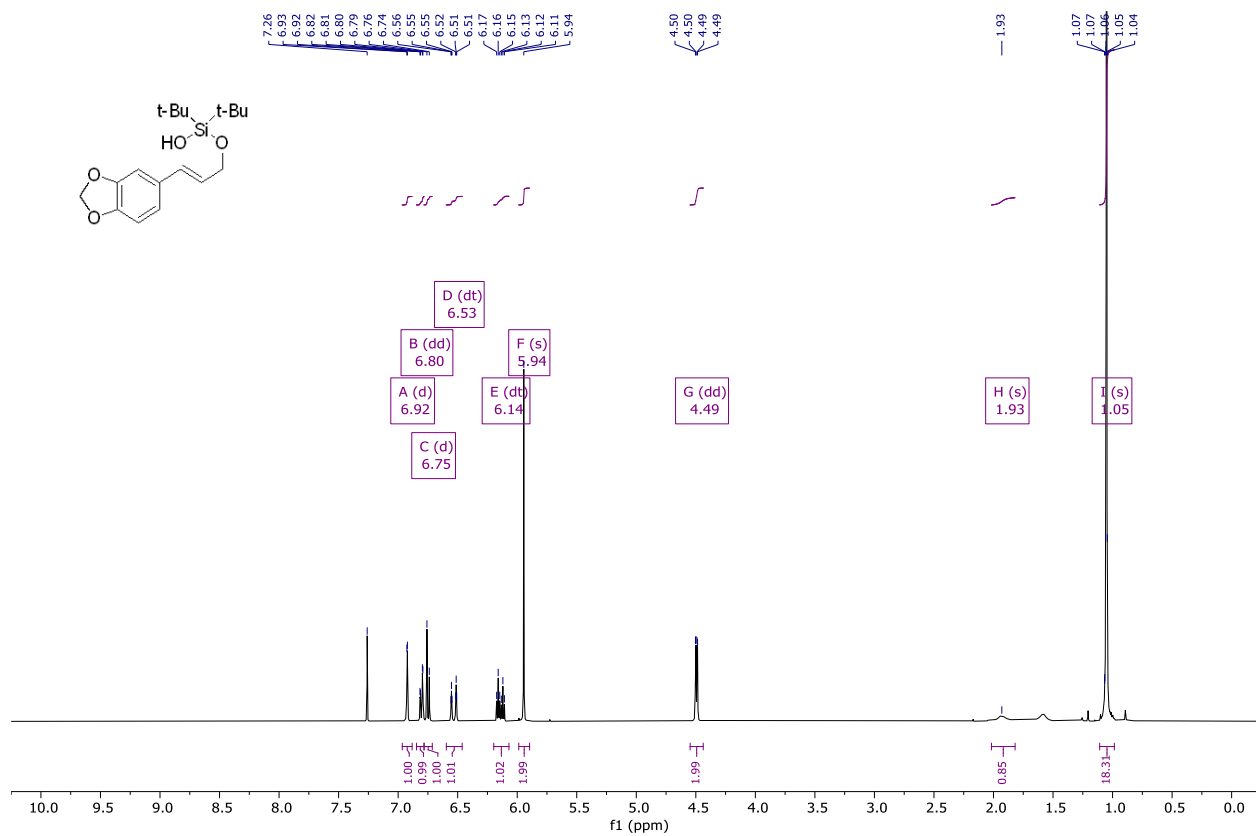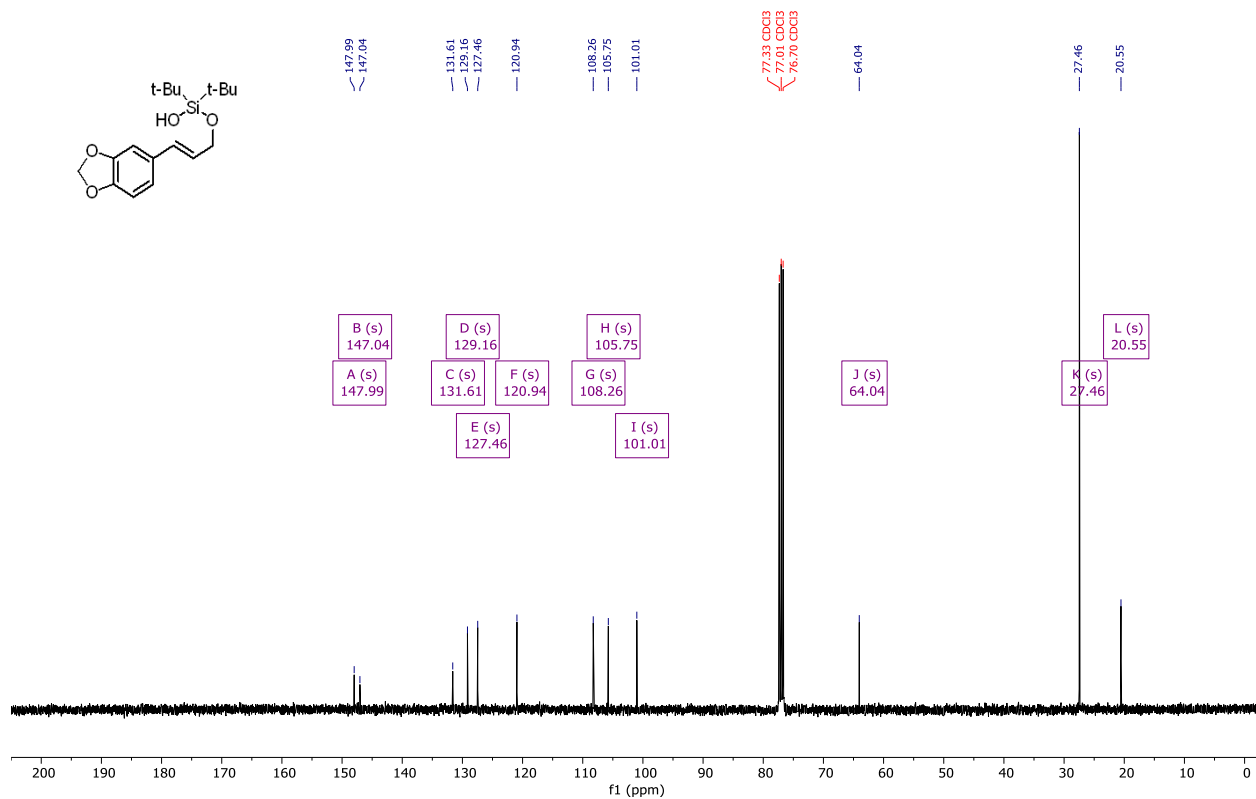

Compound 14 ( $^1\text{H}$  NMR: 400 MHz,  $^{13}\text{C}$  NMR: 100 MHz)

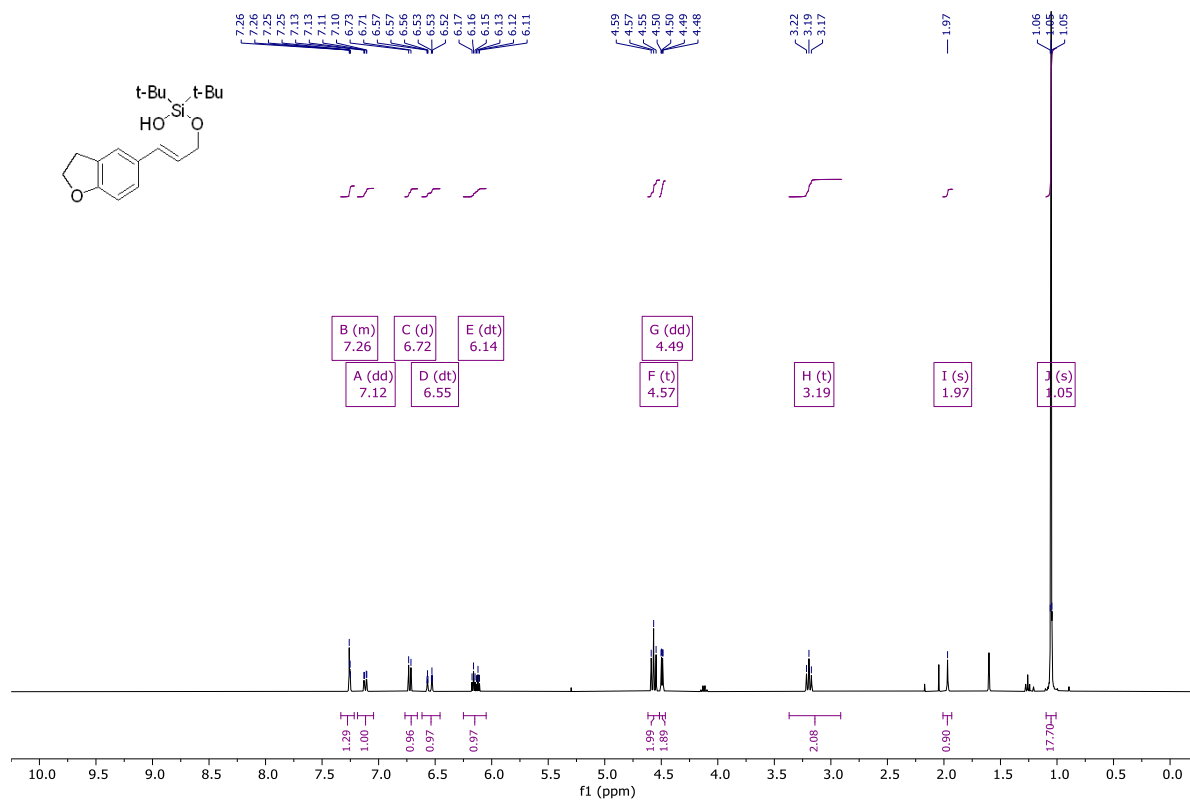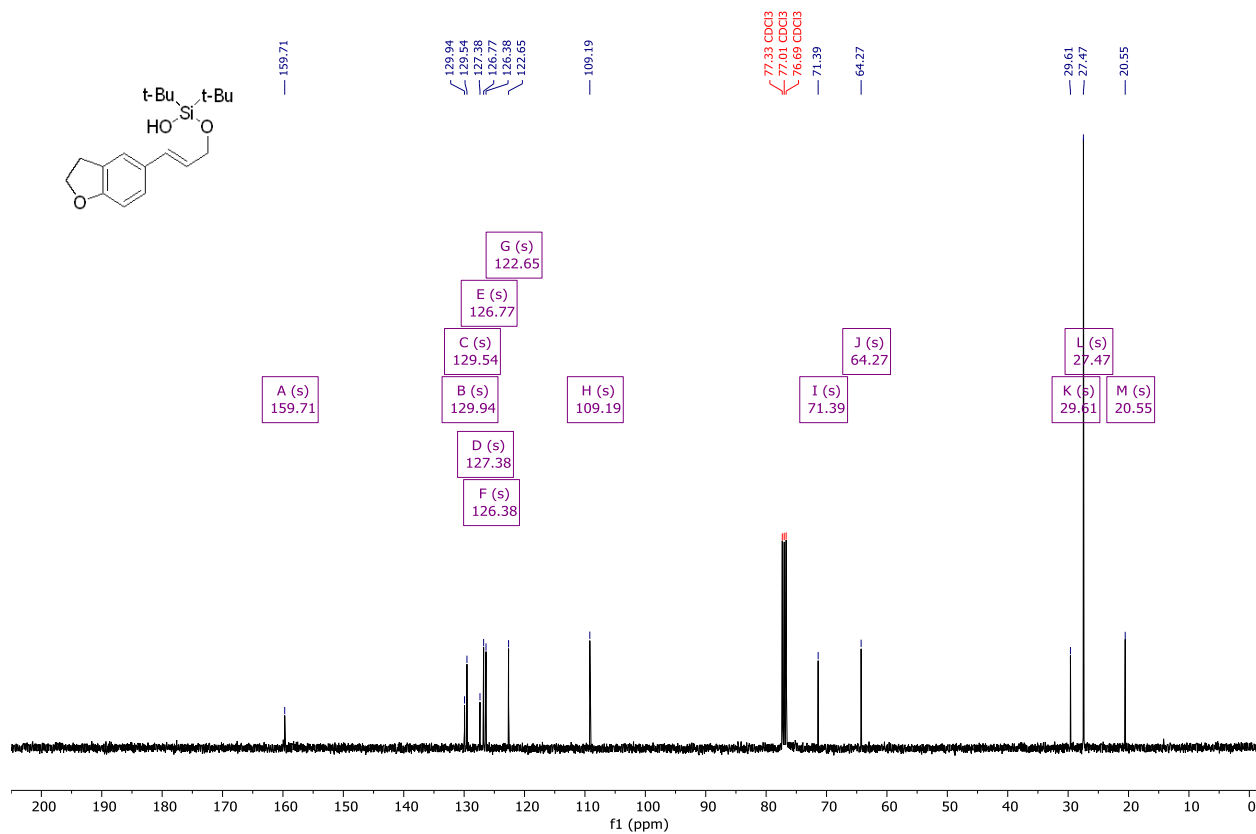

Compound 15 ( $^1\text{H}$  NMR: 400 MHz,  $^{13}\text{C}$  NMR: 100 MHz)

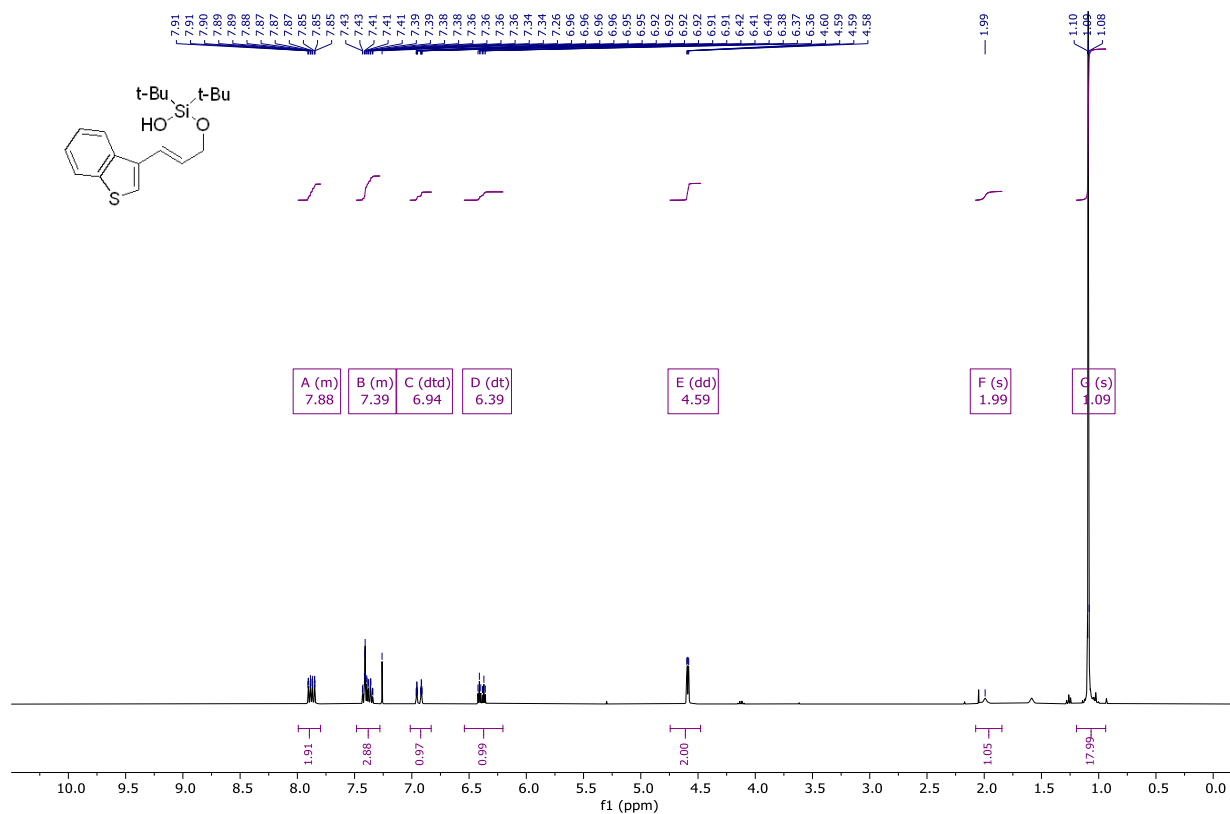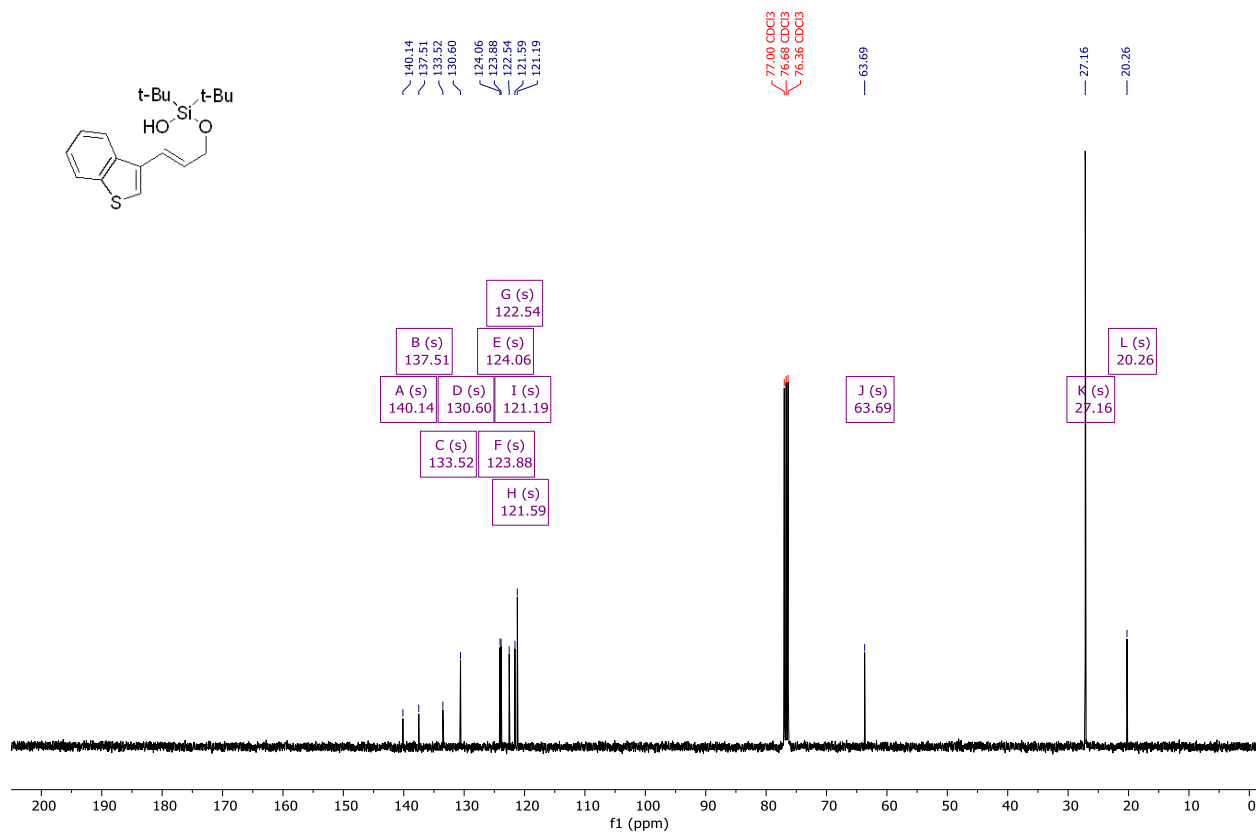

Compound 16 ( $^1\text{H}$  NMR: 400 MHz,  $^{13}\text{C}$  NMR: 100 MHz)

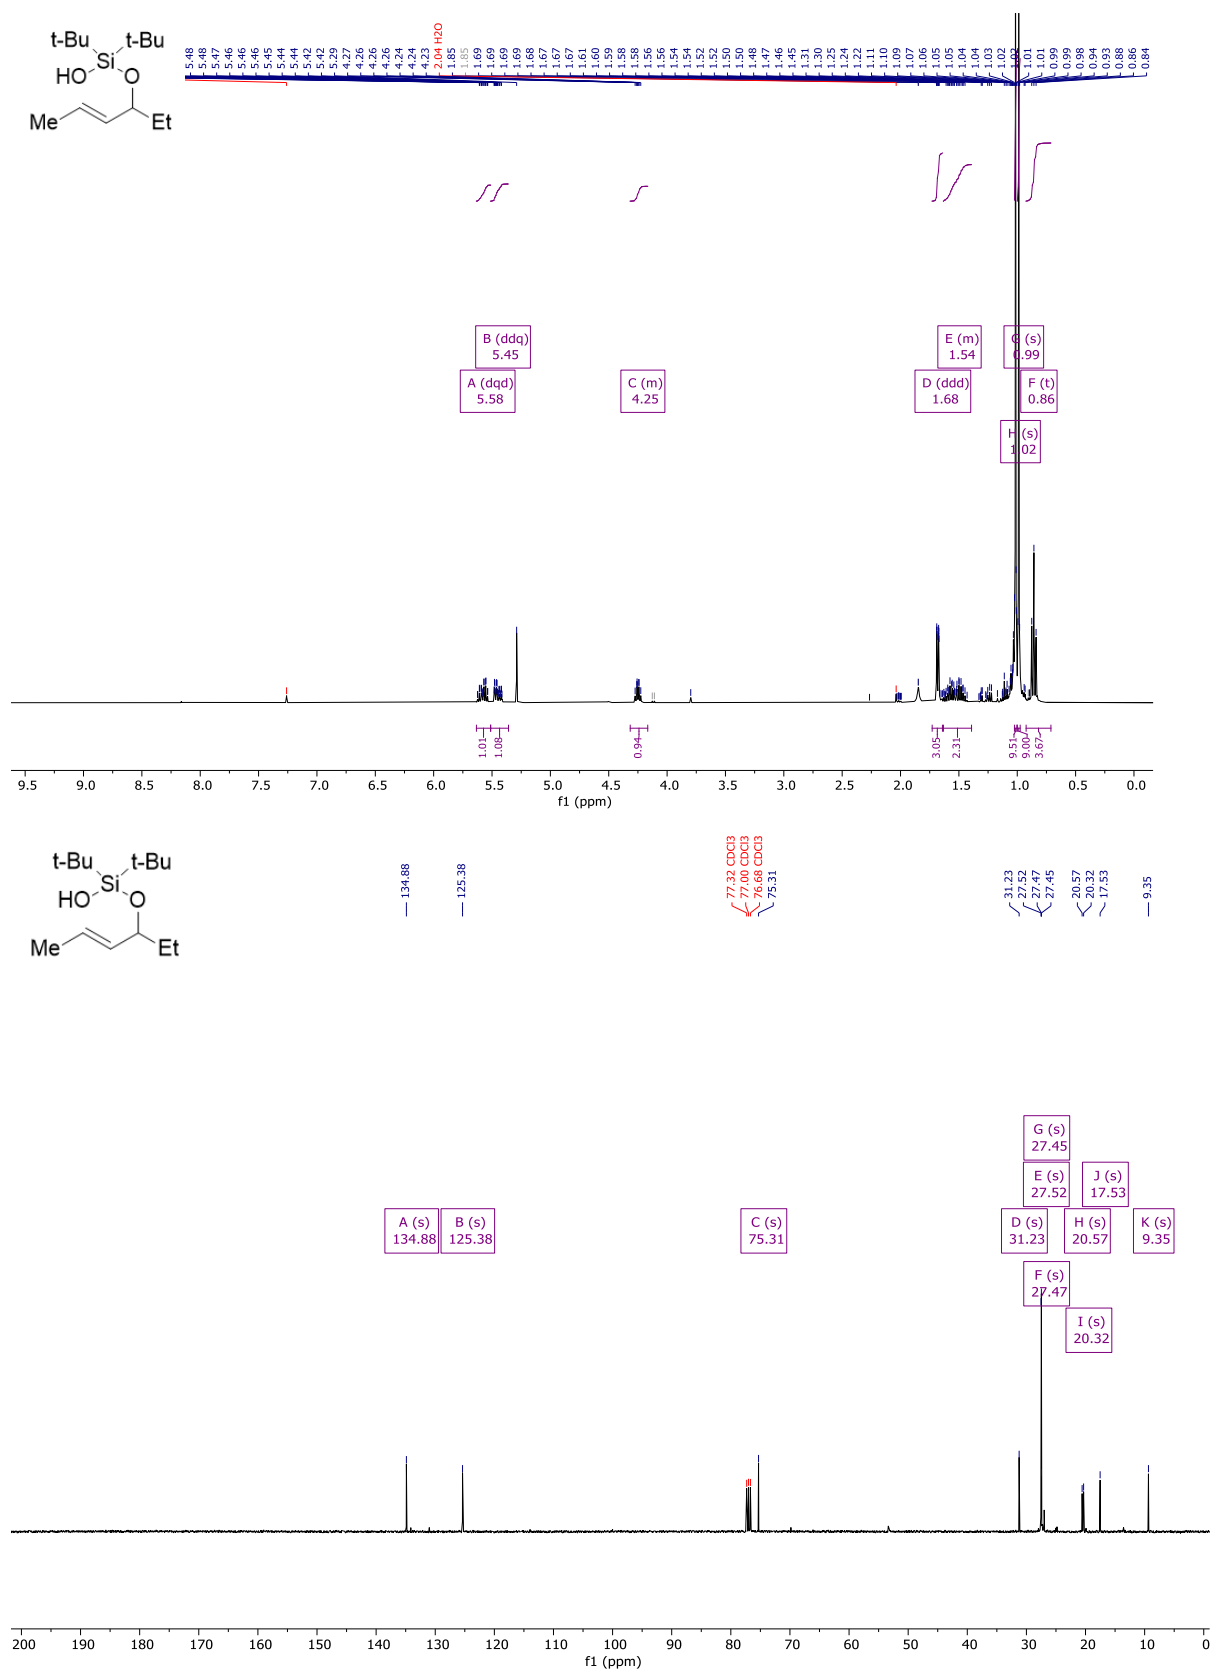

Compound 17 (<sup>1</sup>H NMR: 400 MHz, <sup>13</sup>C NMR: 100 MHz)

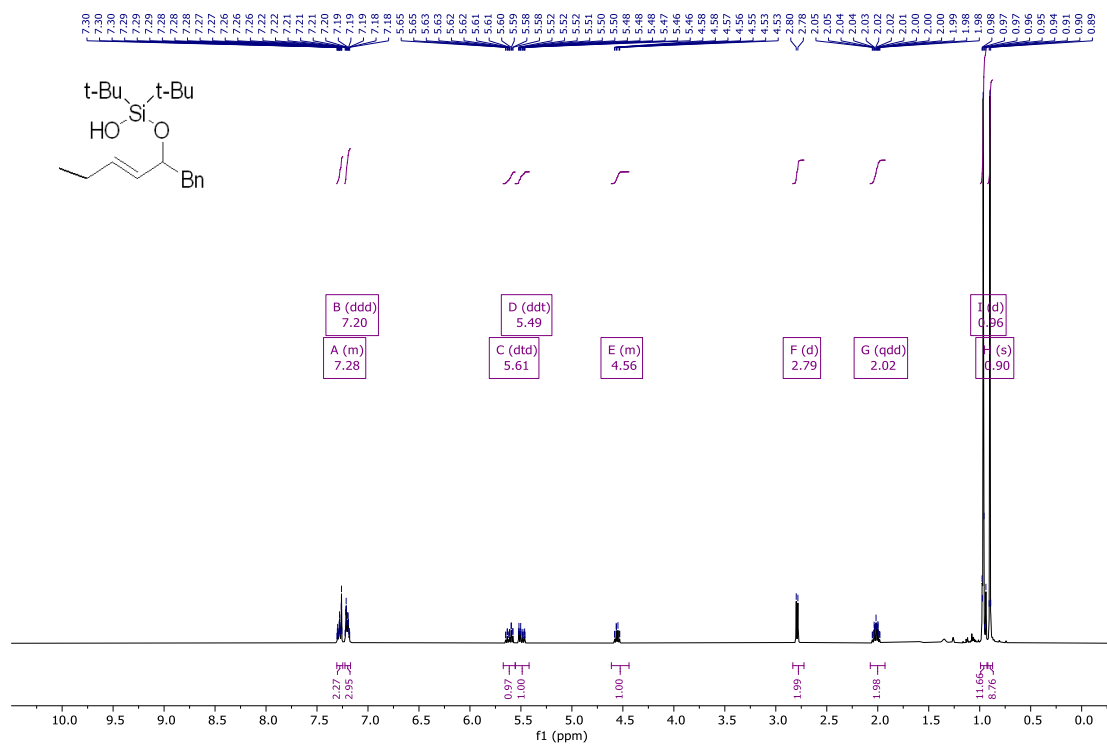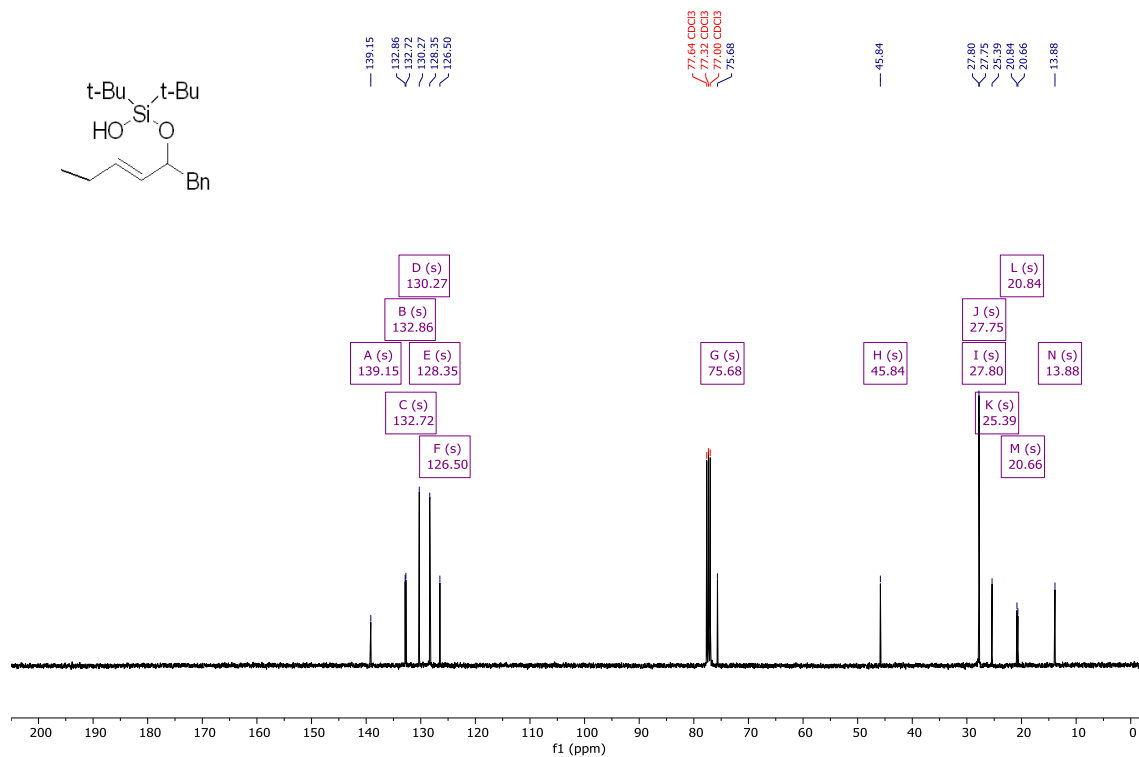

Compound 18 ( $^1\text{H}$  NMR: 400 MHz,  $^{13}\text{C}$  NMR: 100 MHz)

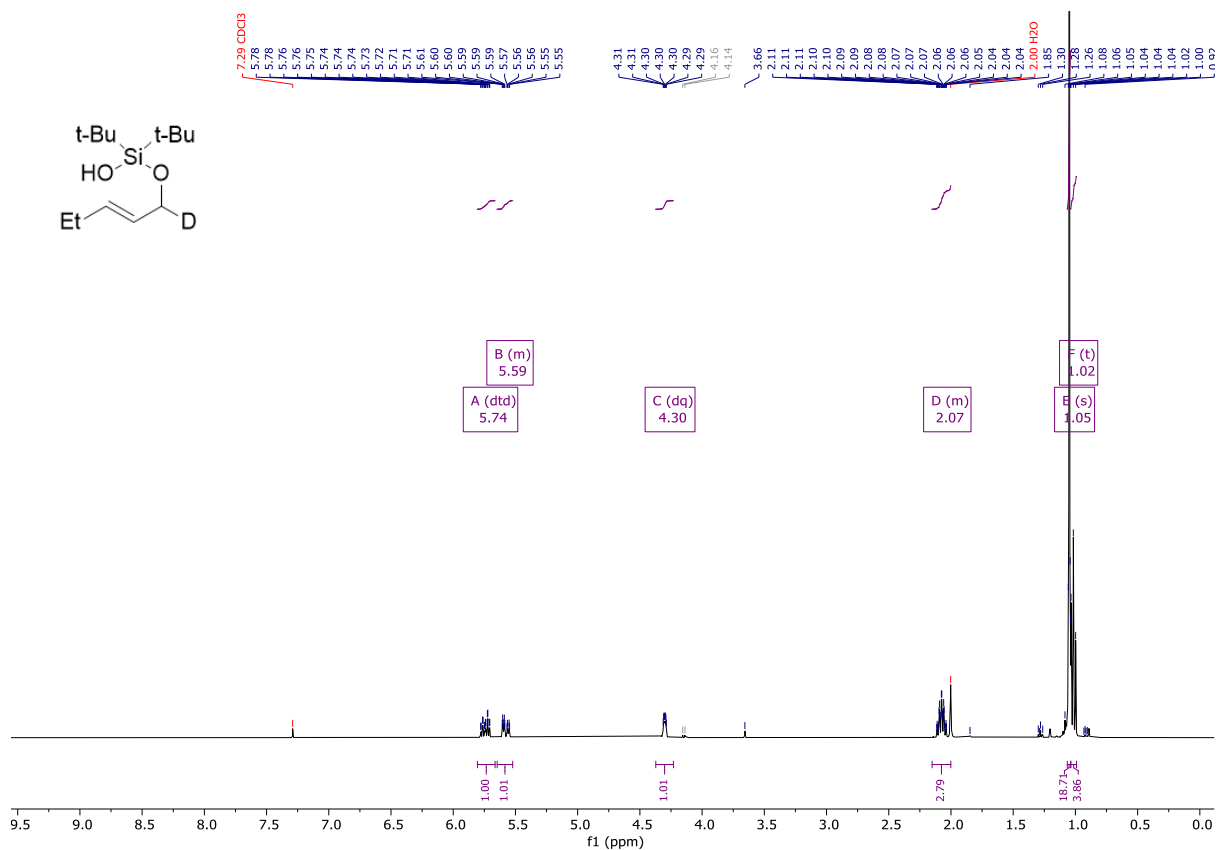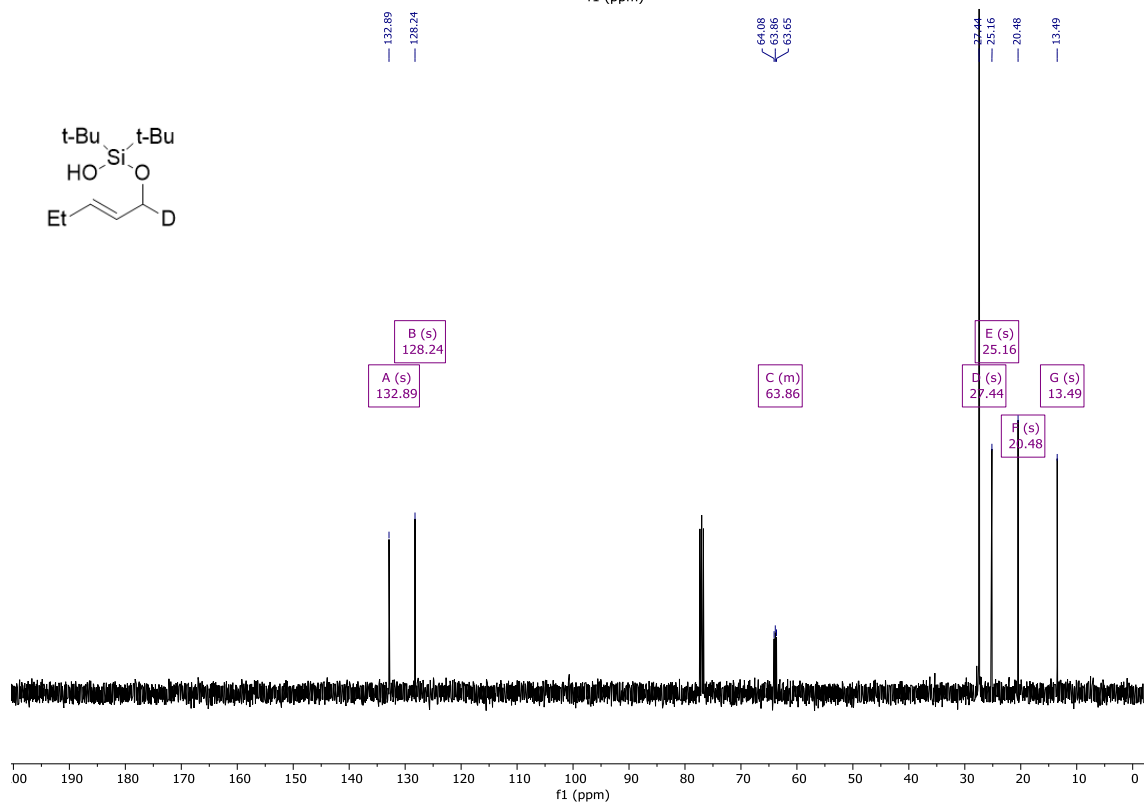



**Compound 19 ( <sup>1</sup>H NMR: 400 MHz, <sup>13</sup>C NMR: 100 MHz)**

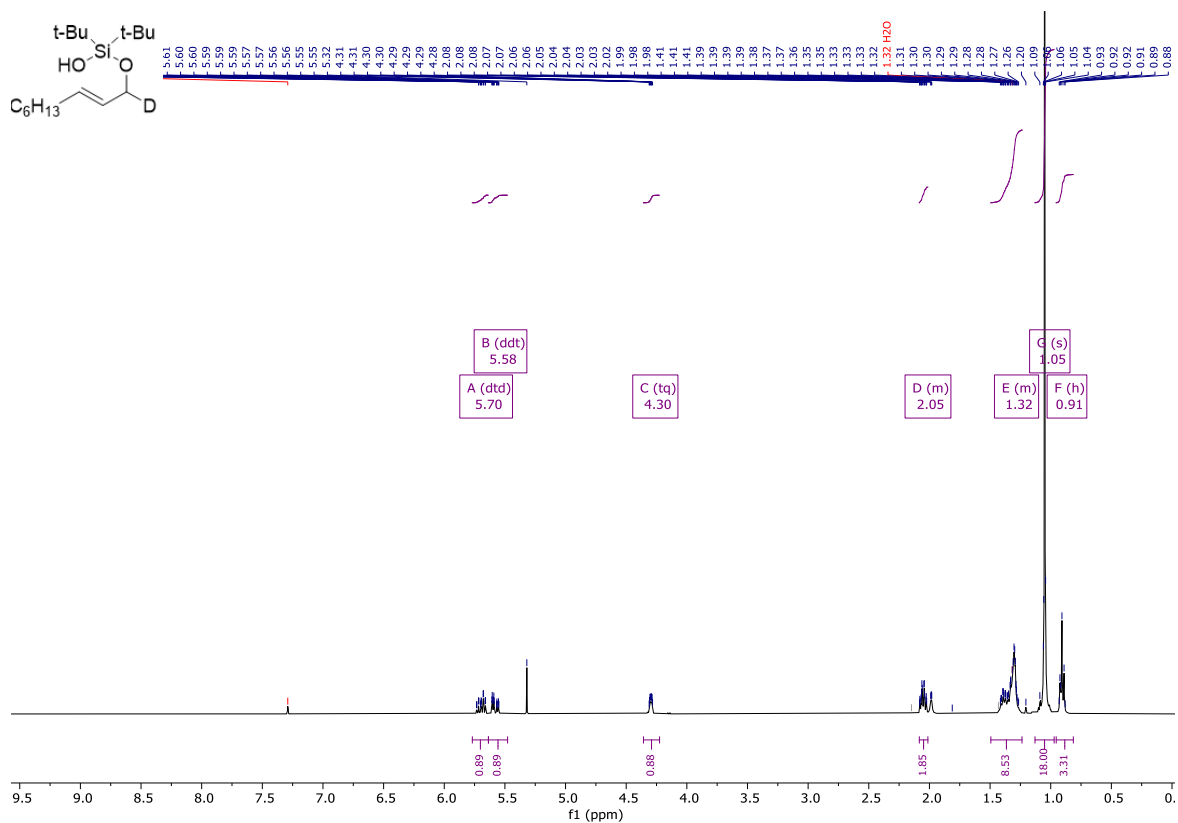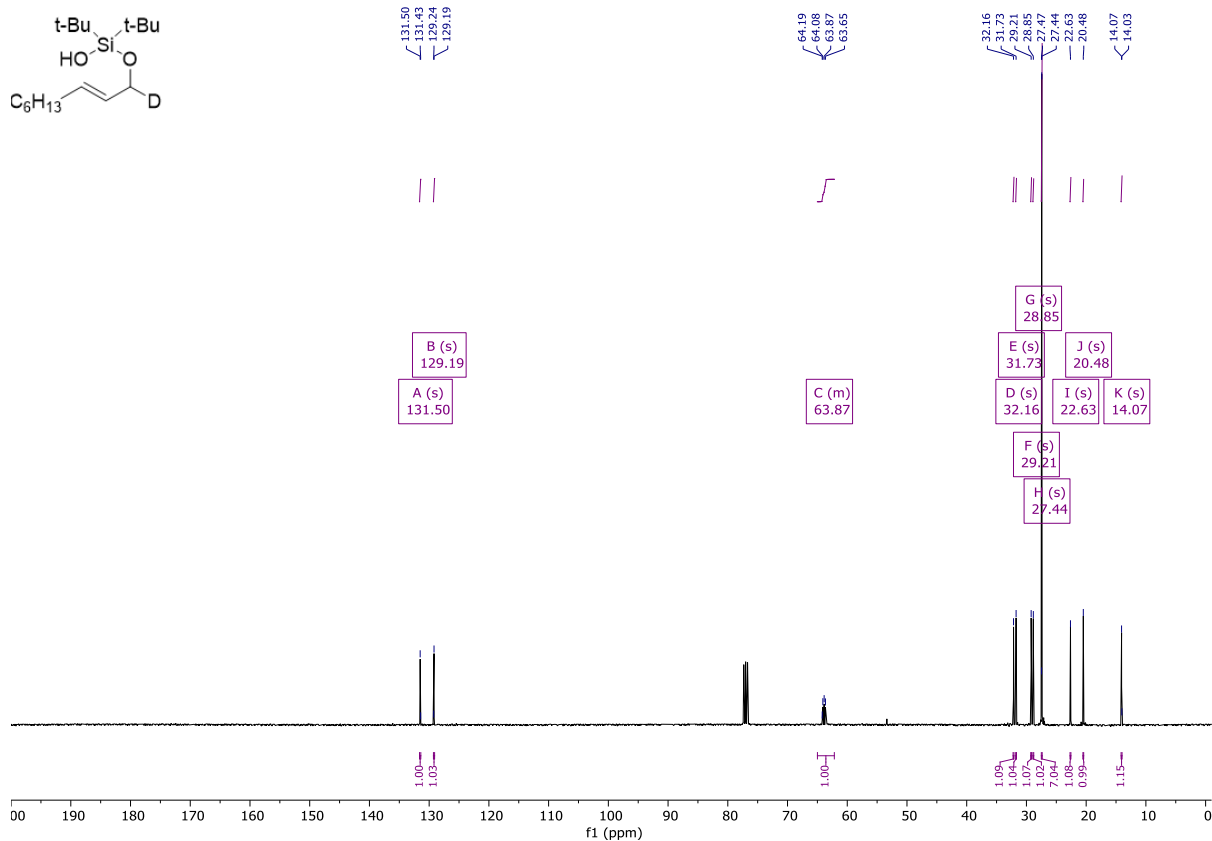

Compound 20 (  $^1\text{H}$  NMR: 400 MHz,  $^{13}\text{C}$  NMR: 100 MHz)

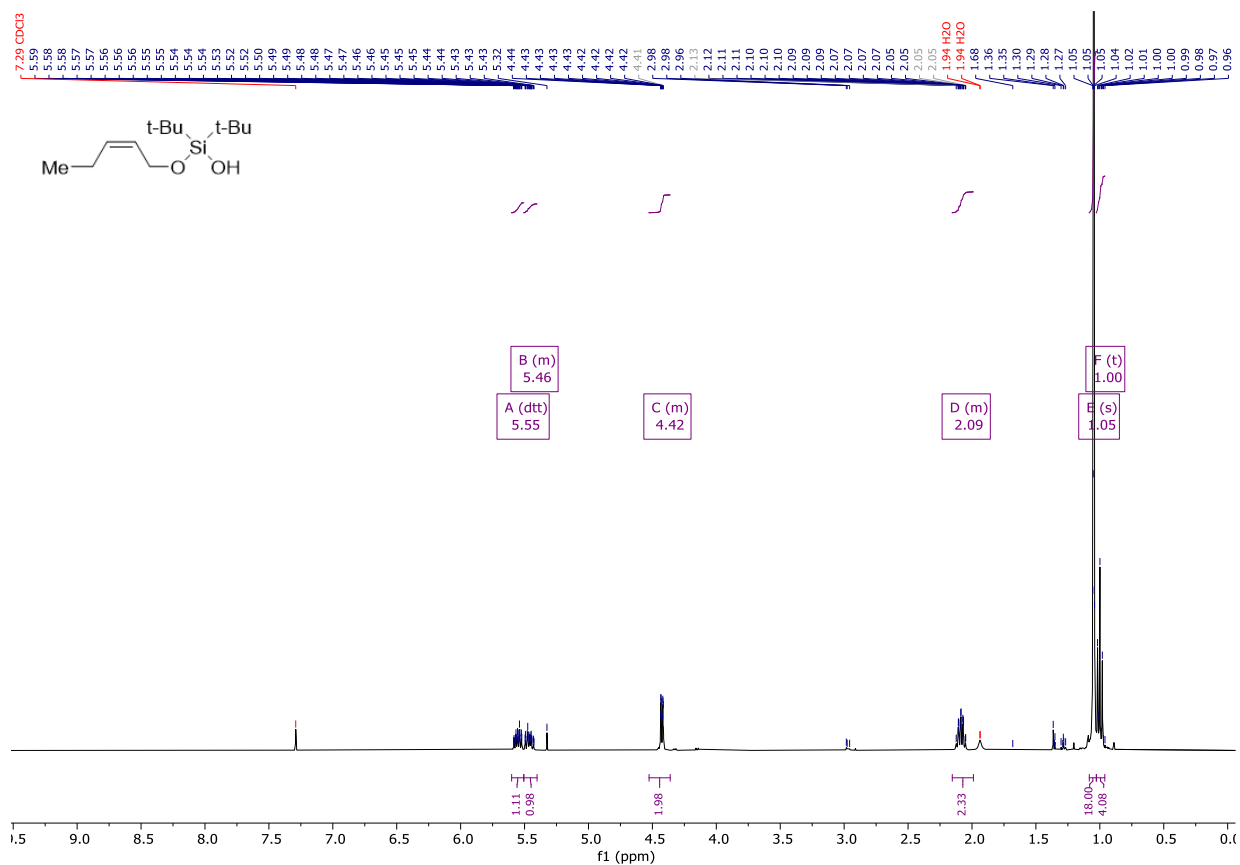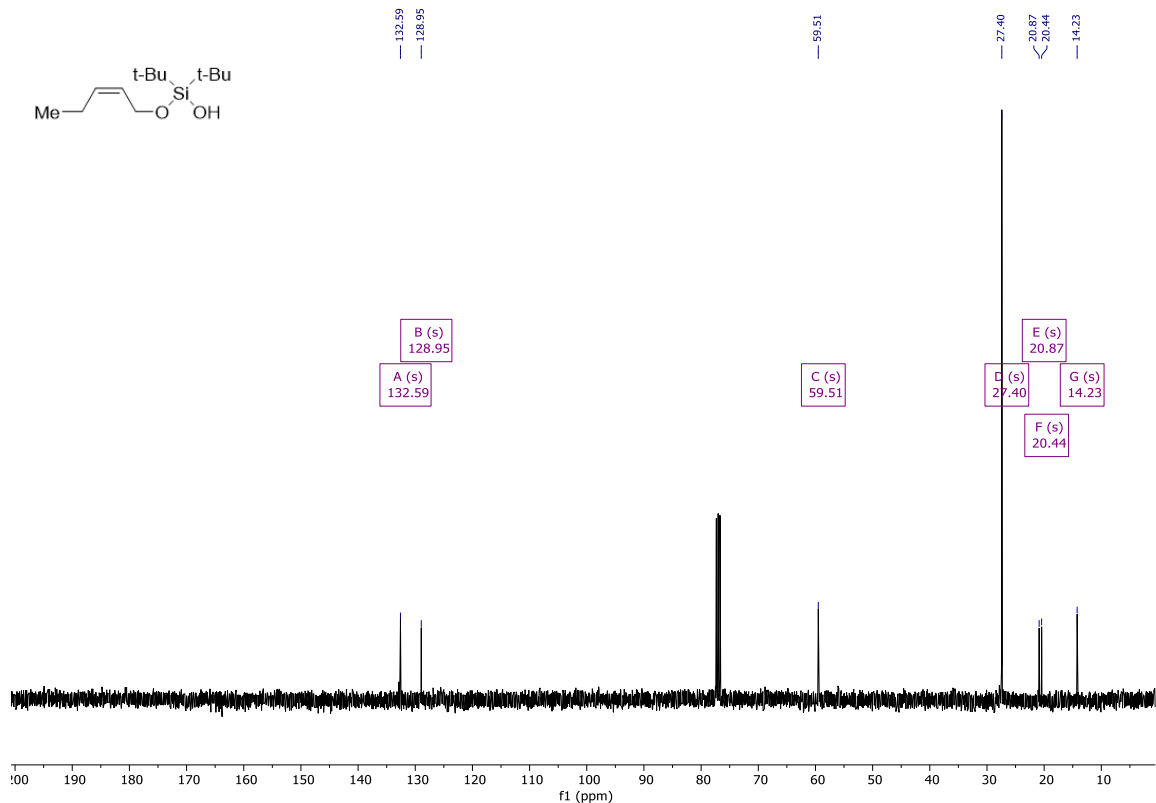

Compound 21 ( $^1\text{H}$  NMR: 400 MHz,  $^{13}\text{C}$  NMR: 100 MHz)

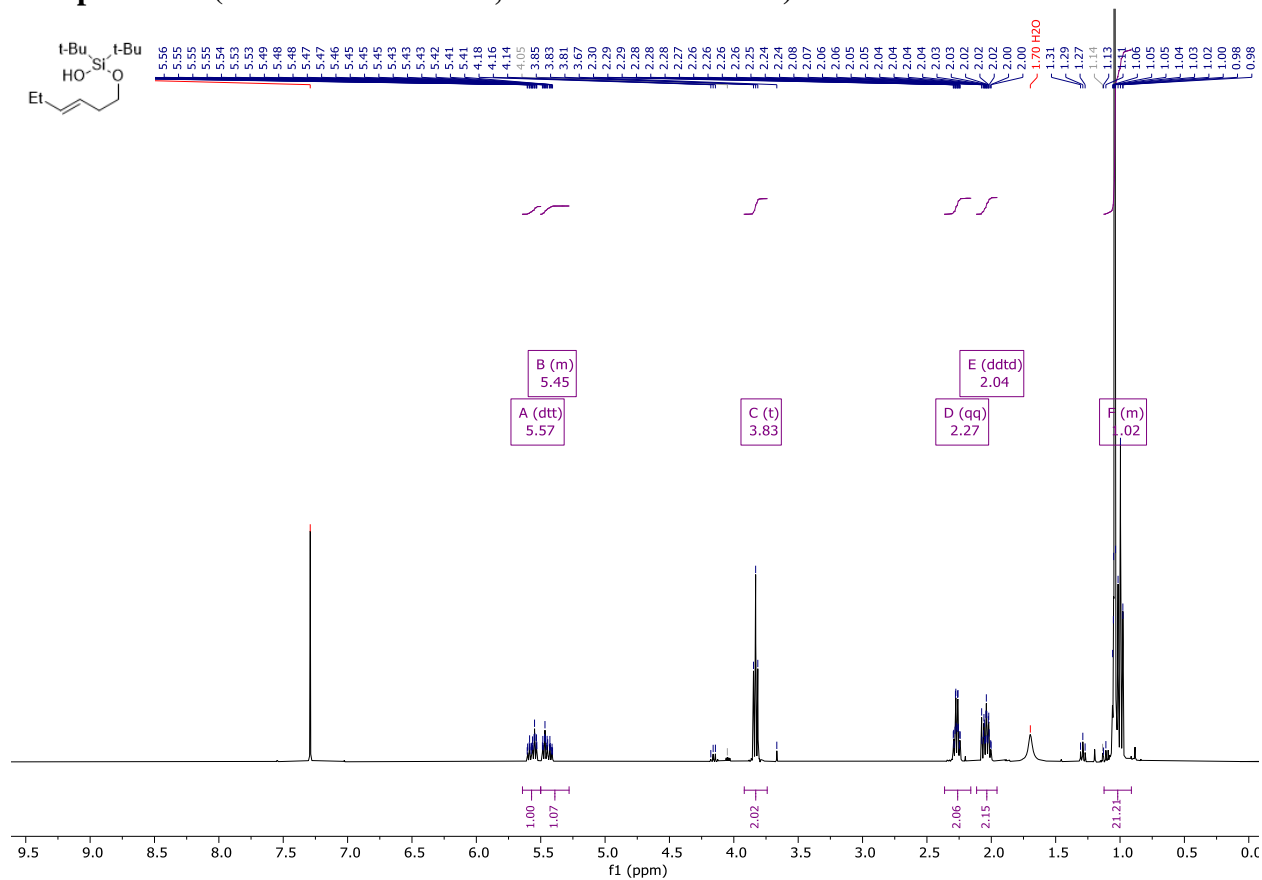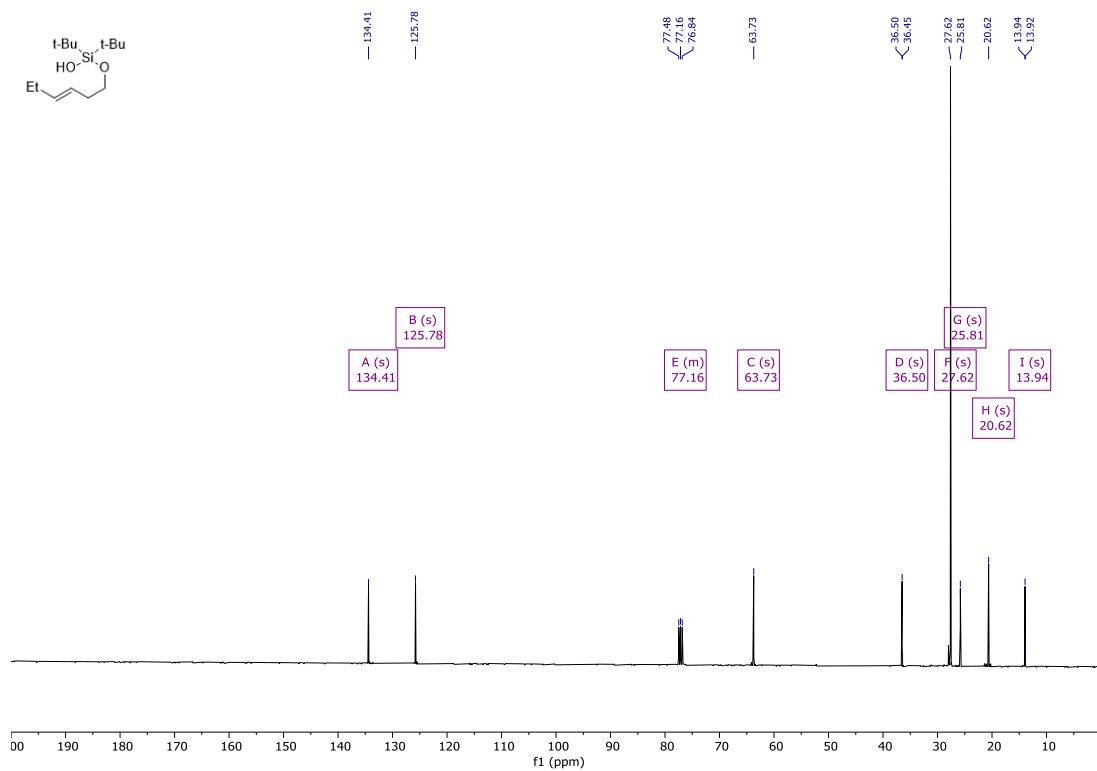

Compound 22 ( $^1\text{H}$  NMR: 400 MHz,  $^{13}\text{C}$  NMR: 100 MHz)

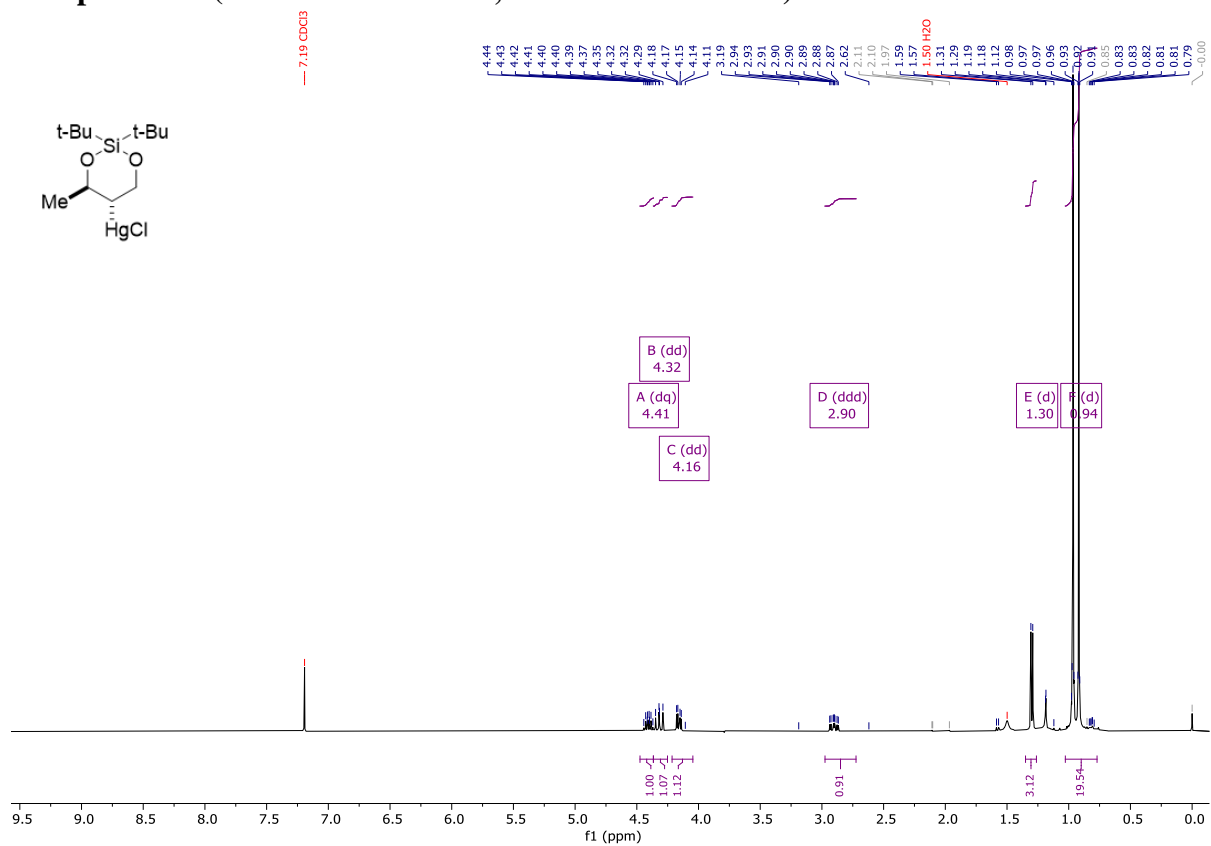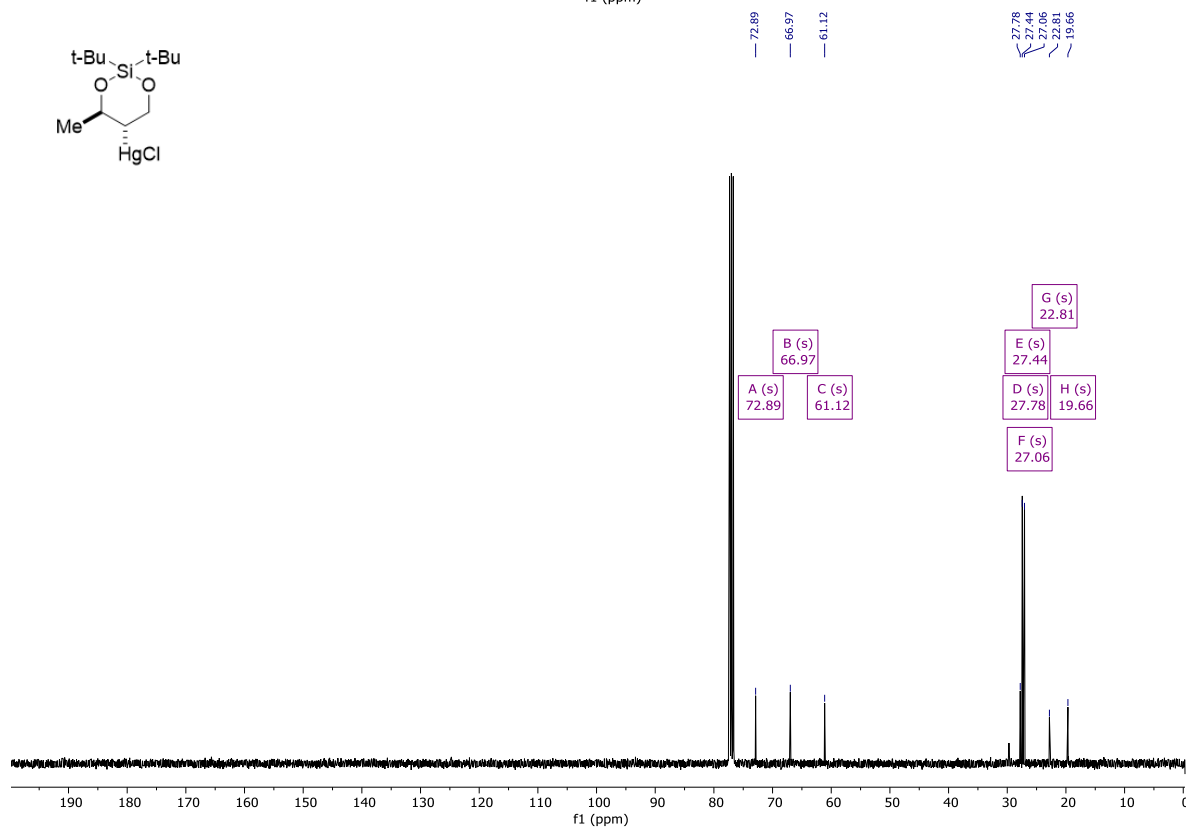



Compound 24 ( $^1\text{H}$  NMR: 400 MHz,  $^{13}\text{C}$  NMR: 100 MHz)

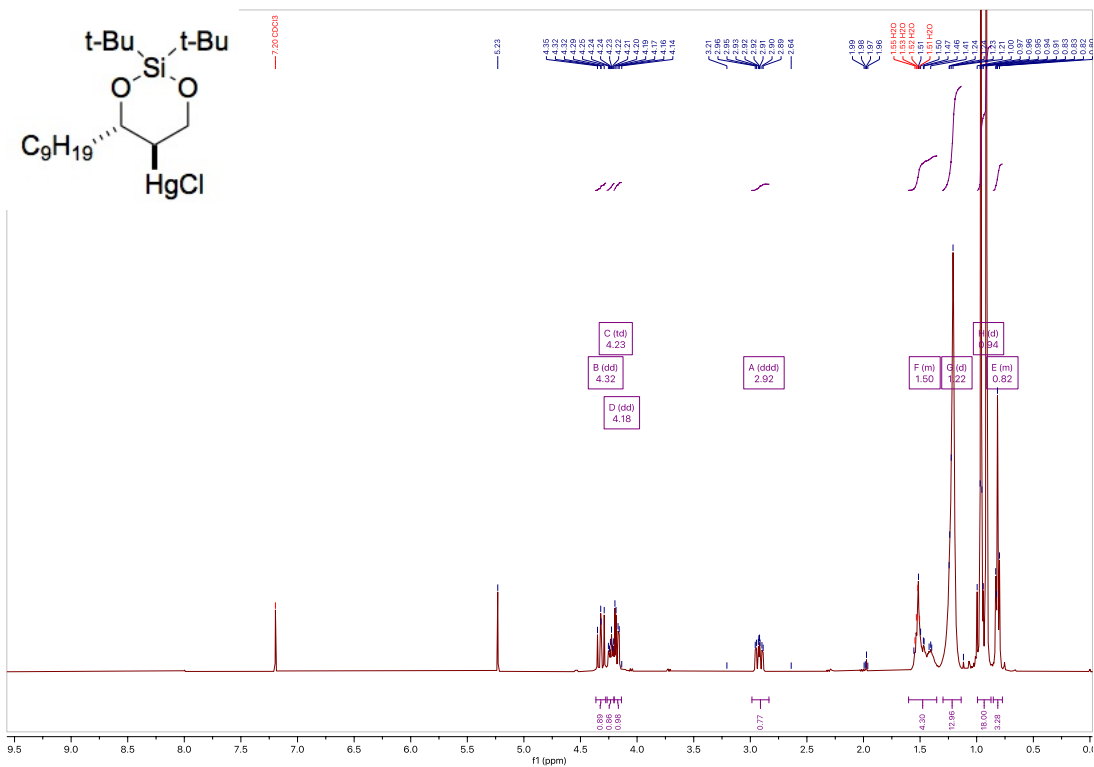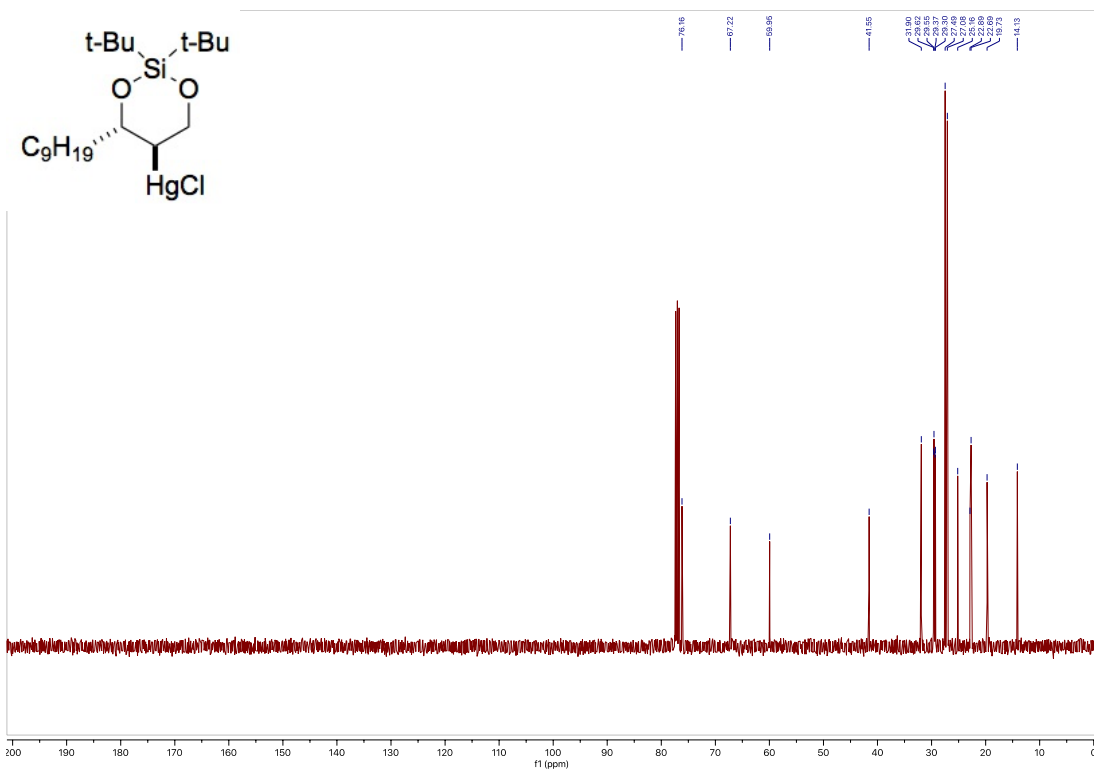

Compound 25 ( $^1\text{H}$  NMR: 400 MHz,  $^{13}\text{C}$  NMR: 100 MHz)

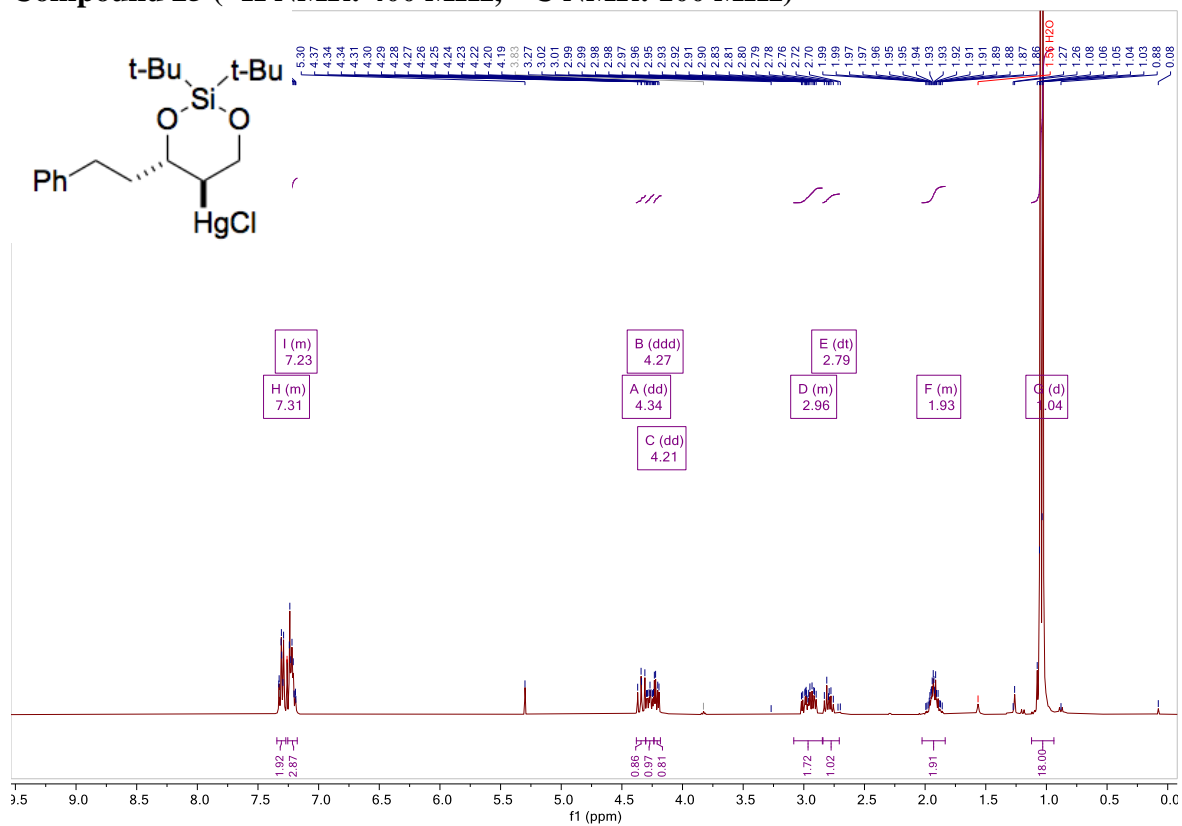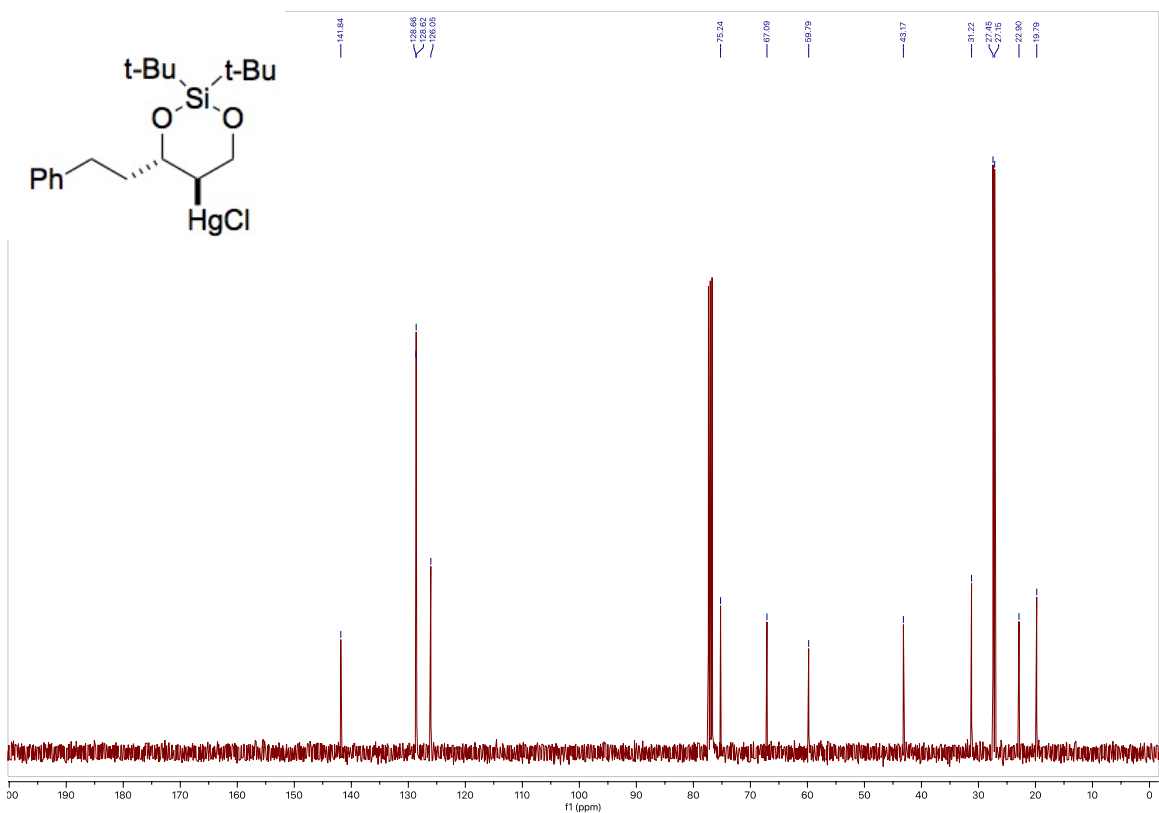

Compound 26 ( $^1\text{H}$  NMR: 400 MHz,  $^{13}\text{C}$  NMR: 100 MHz)

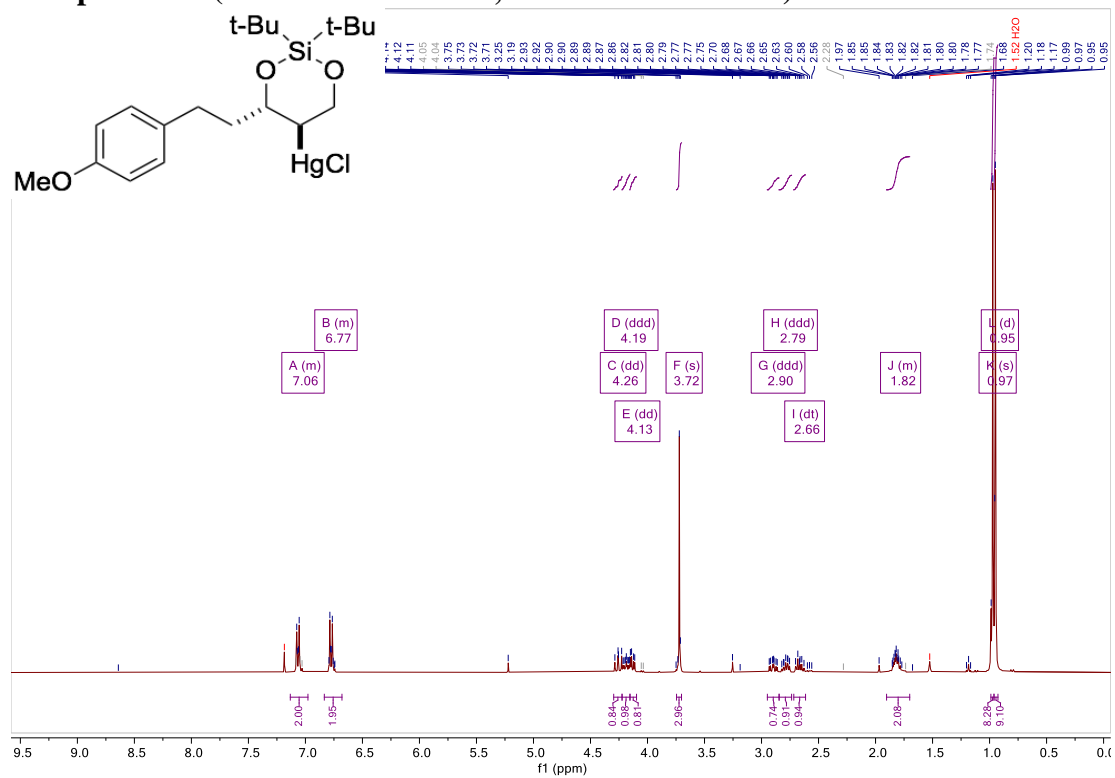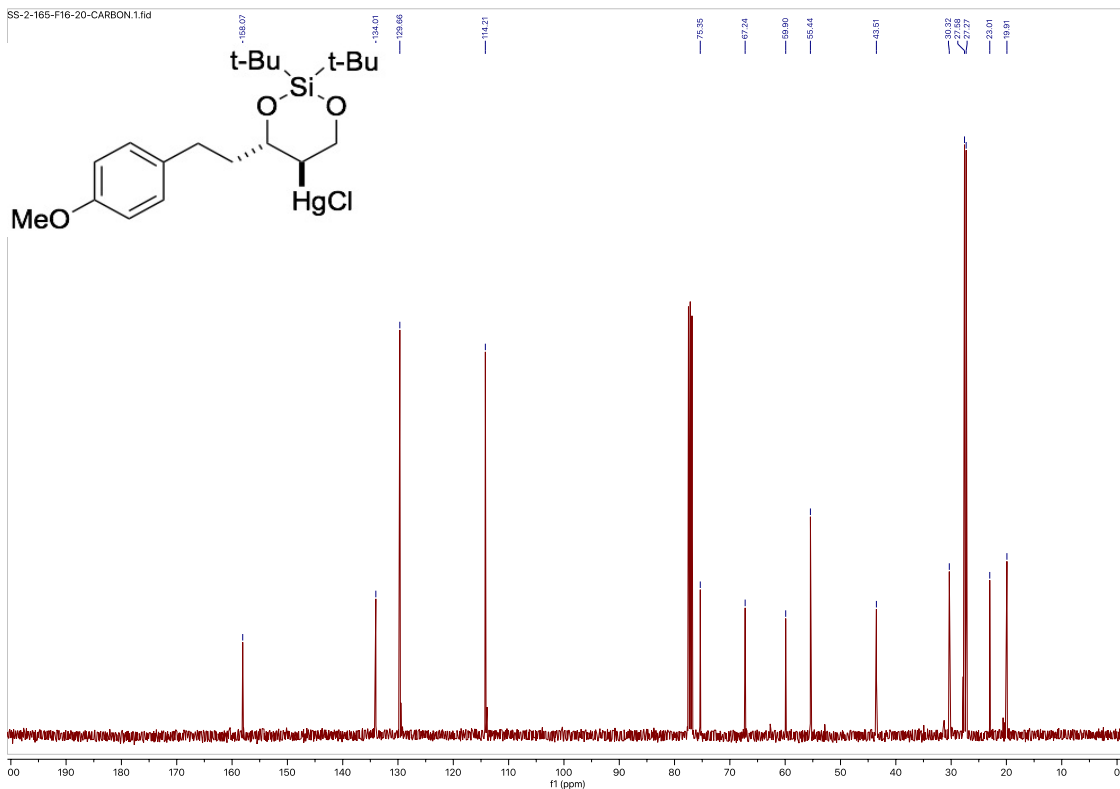



**Compound 27 (  $^1\text{H}$  NMR: 400 MHz,  $^{13}\text{C}$  NMR: 100 MHz)**

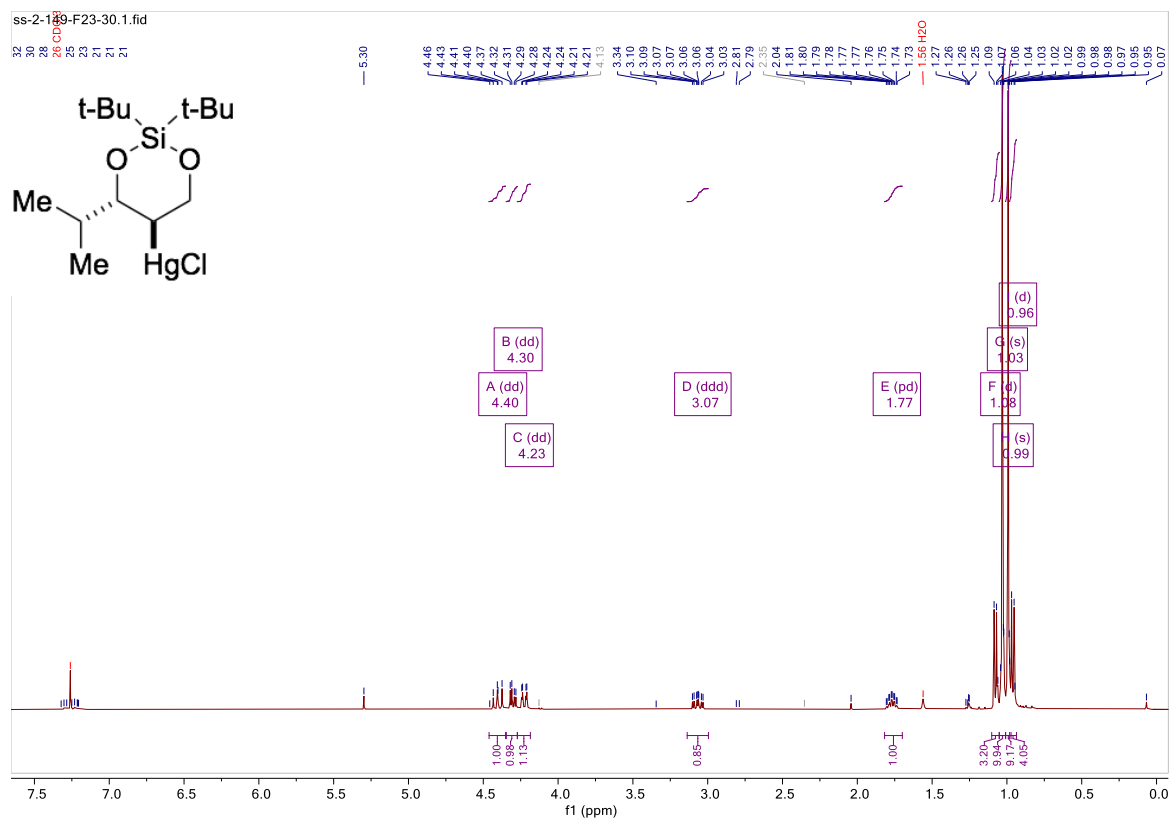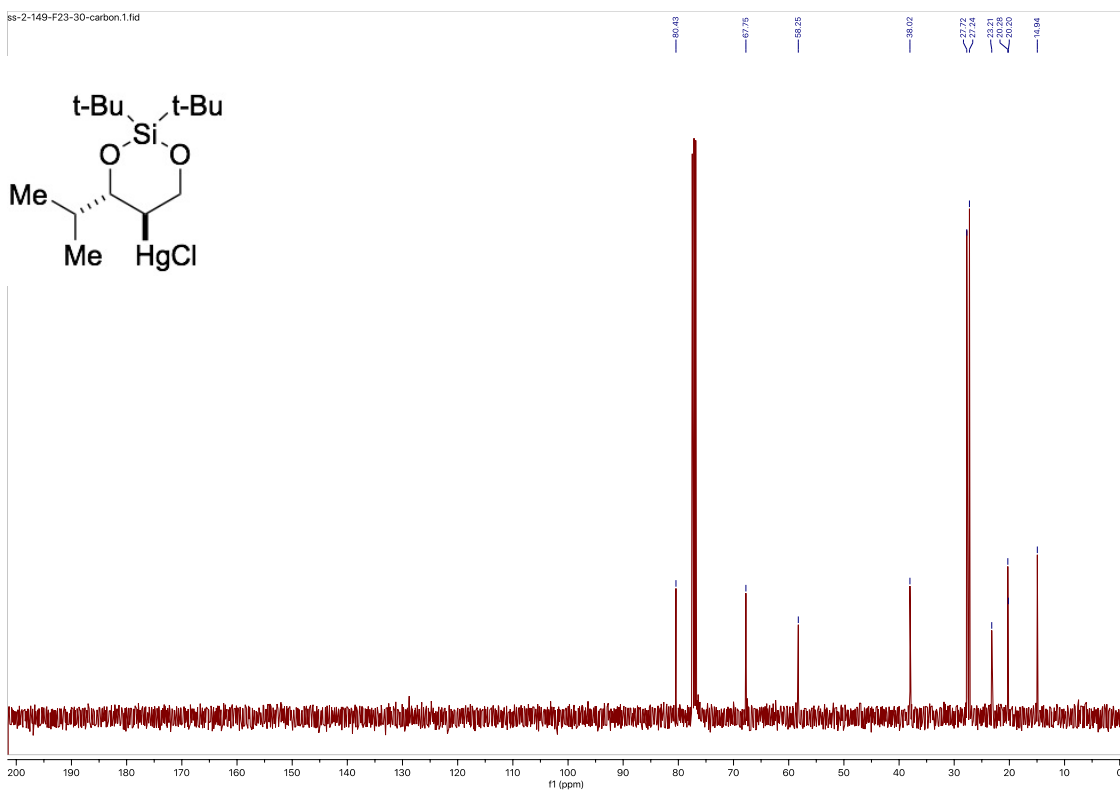

Compound 28 ( $^1\text{H}$  NMR: 400 MHz,  $^{13}\text{C}$  NMR: 100 MHz)

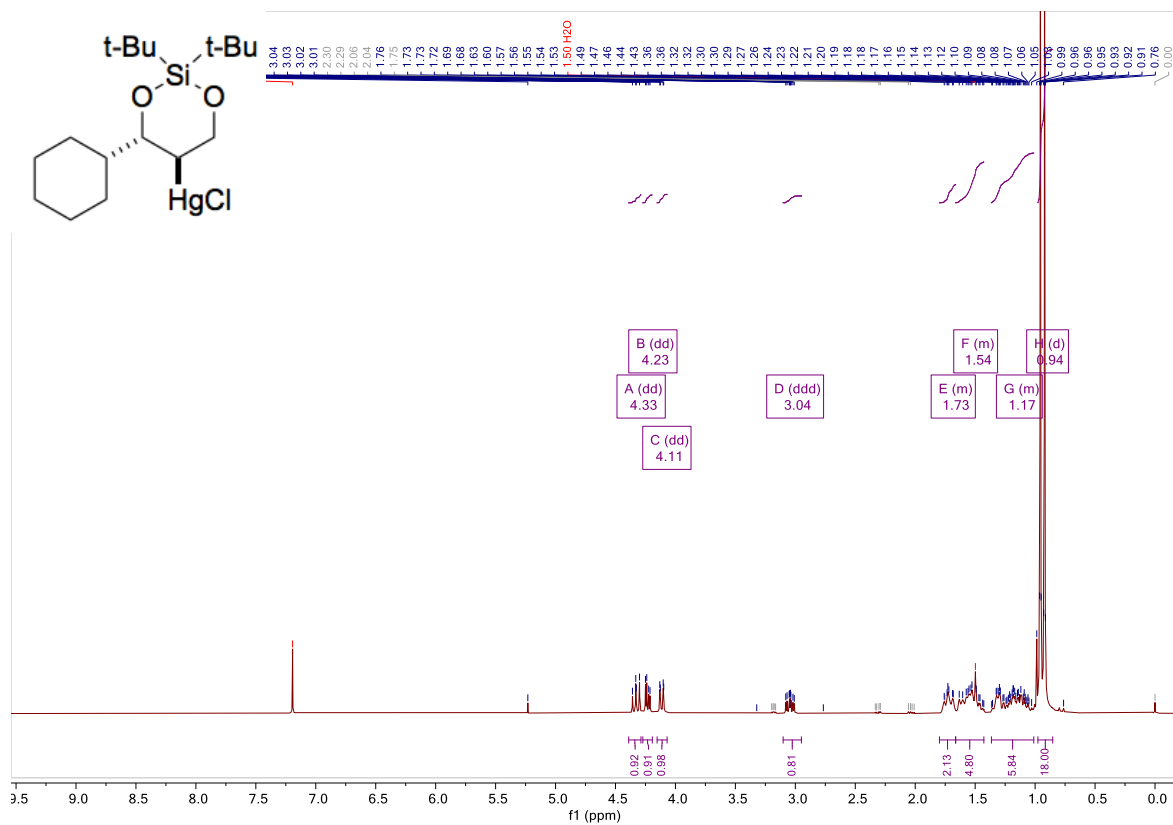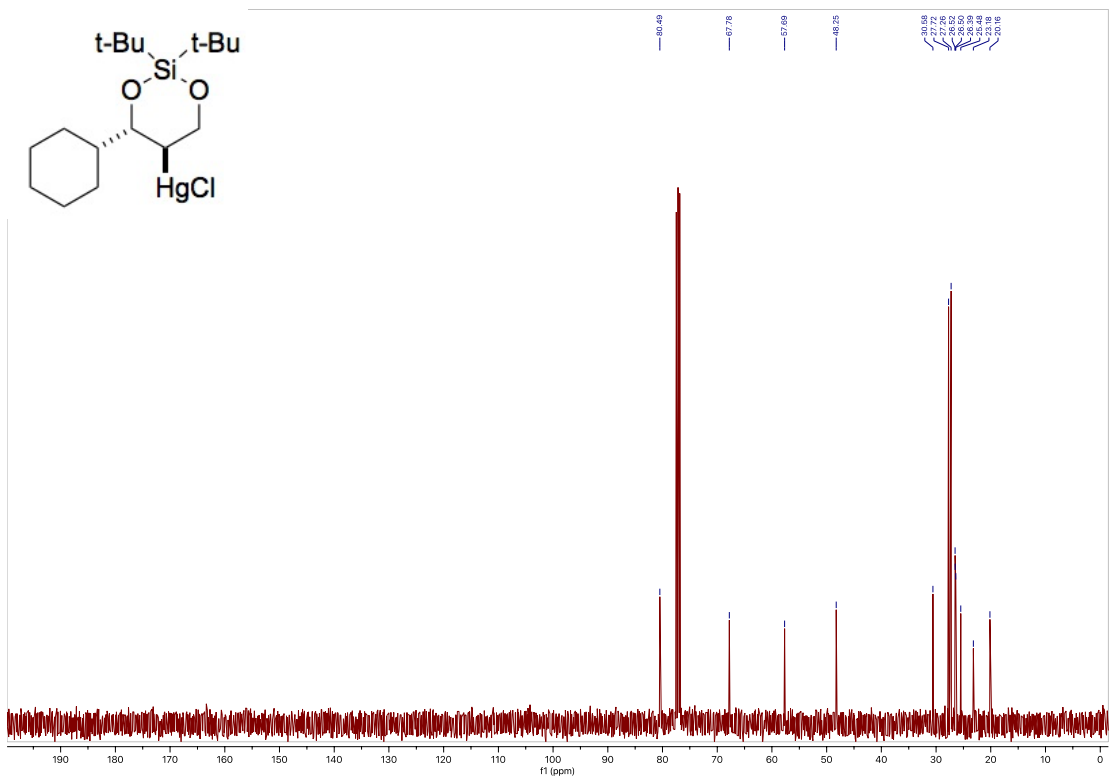

Compound 29 ( $^1\text{H}$  NMR: 400 MHz,  $^{13}\text{C}$  NMR: 100 MHz)

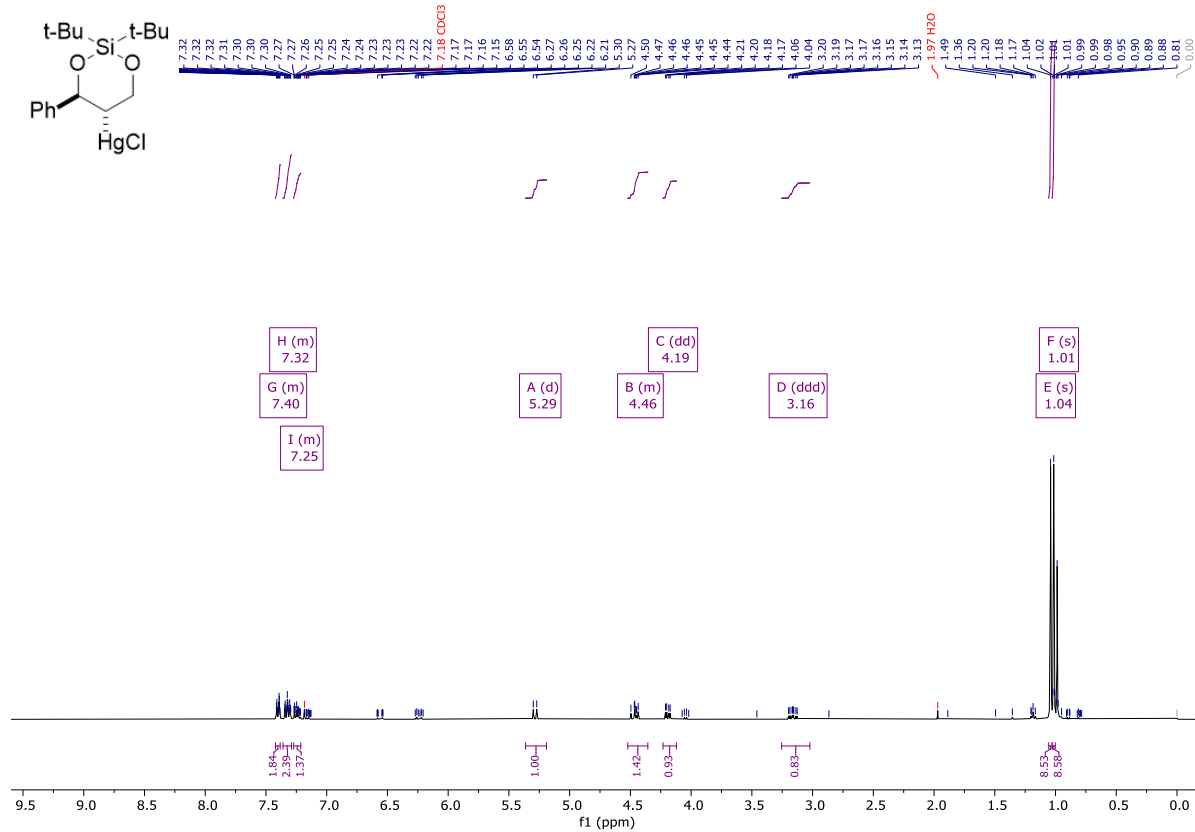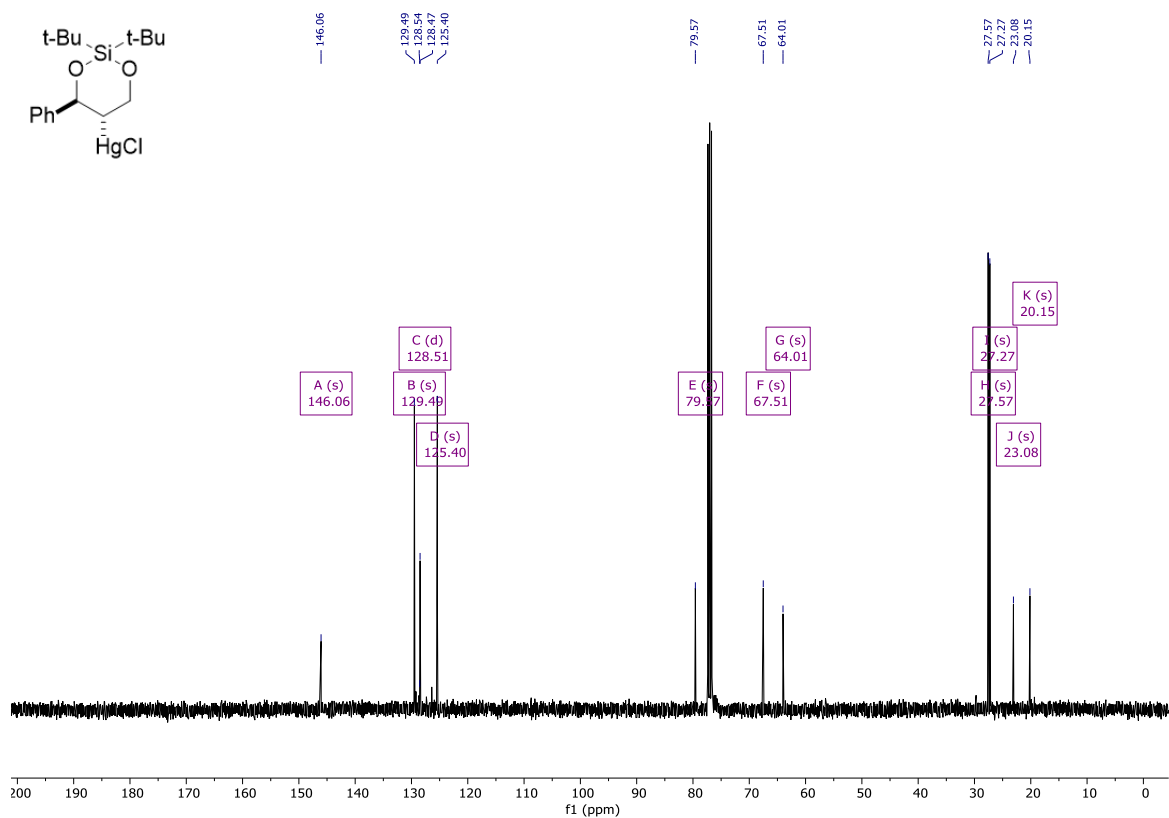

Compound 30 ( $^1\text{H}$  NMR: 400 MHz,  $^{13}\text{C}$  NMR: 100 MHz)

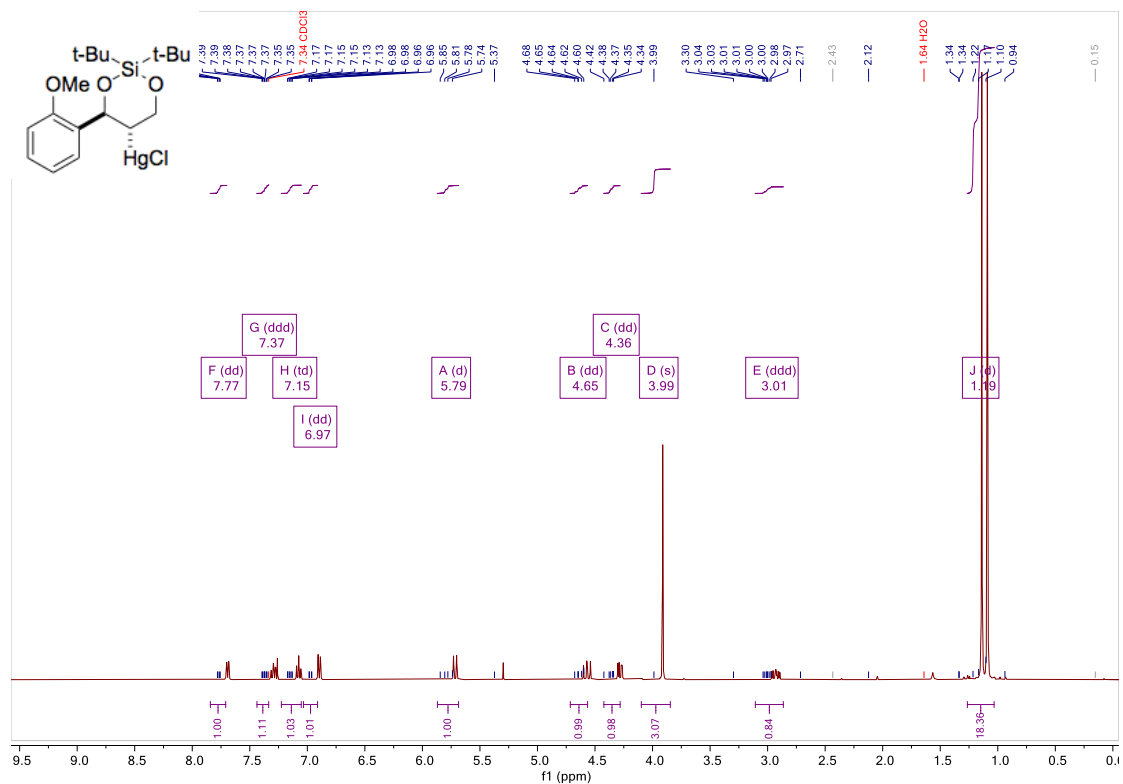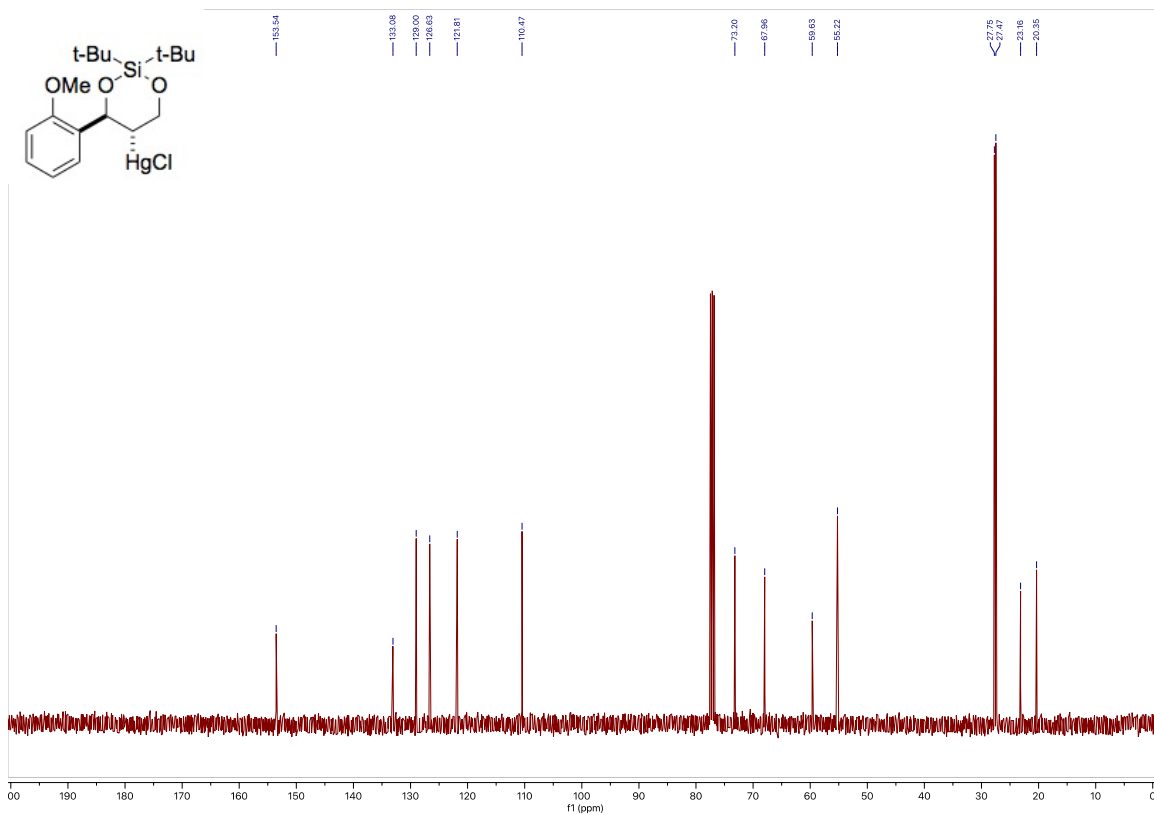

Compound 31 ( $^1\text{H}$  NMR: 400 MHz,  $^{13}\text{C}$  NMR: 100 MHz)

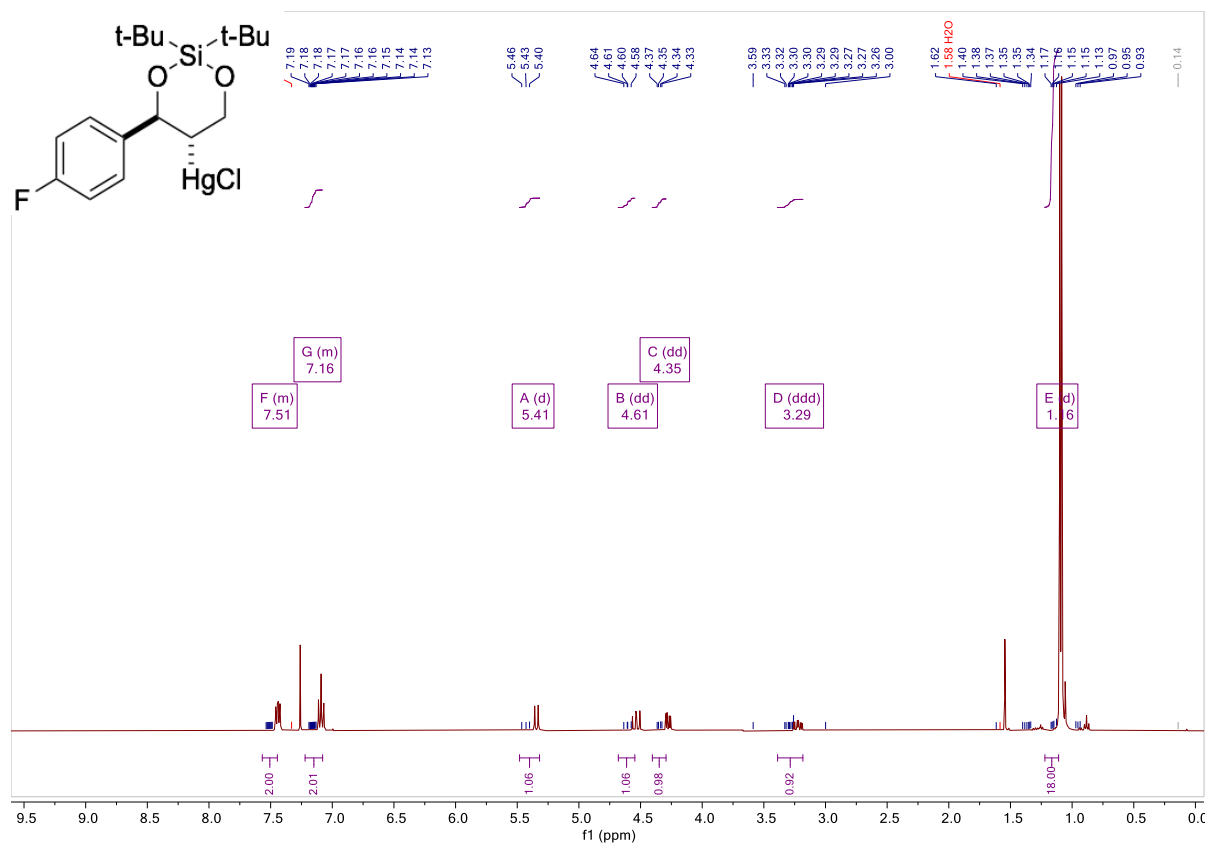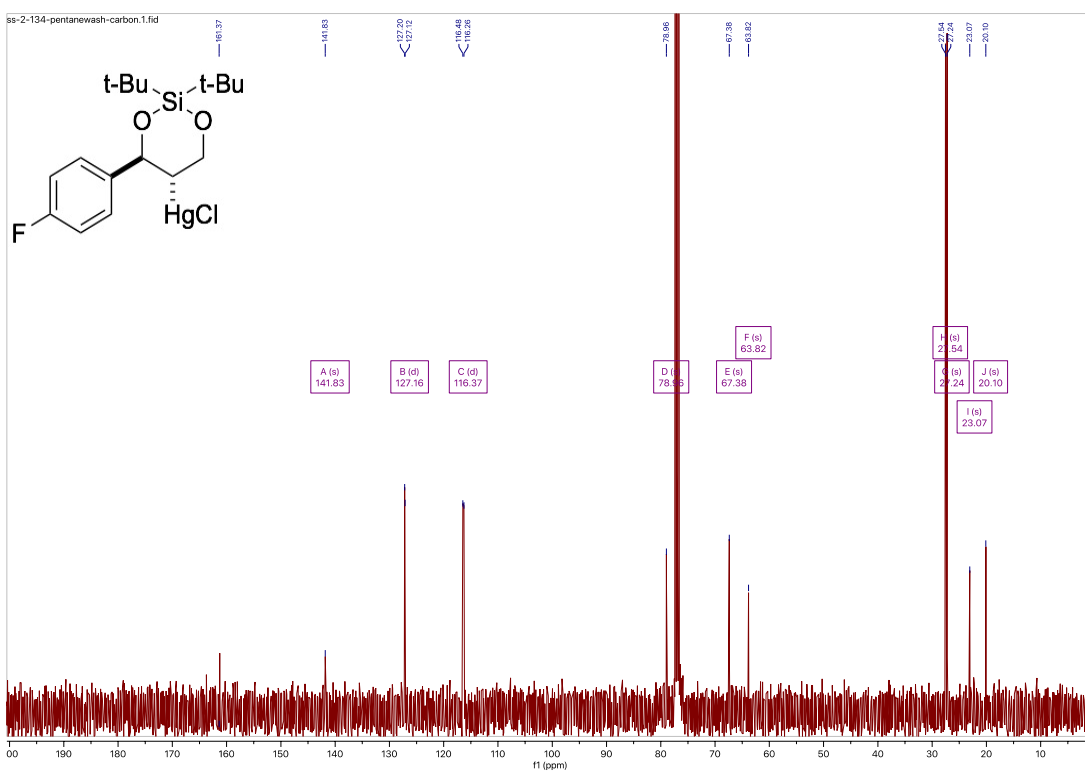

Compound 32 ( $^1\text{H}$  NMR: 400 MHz,  $^{13}\text{C}$  NMR: 100 MHz)

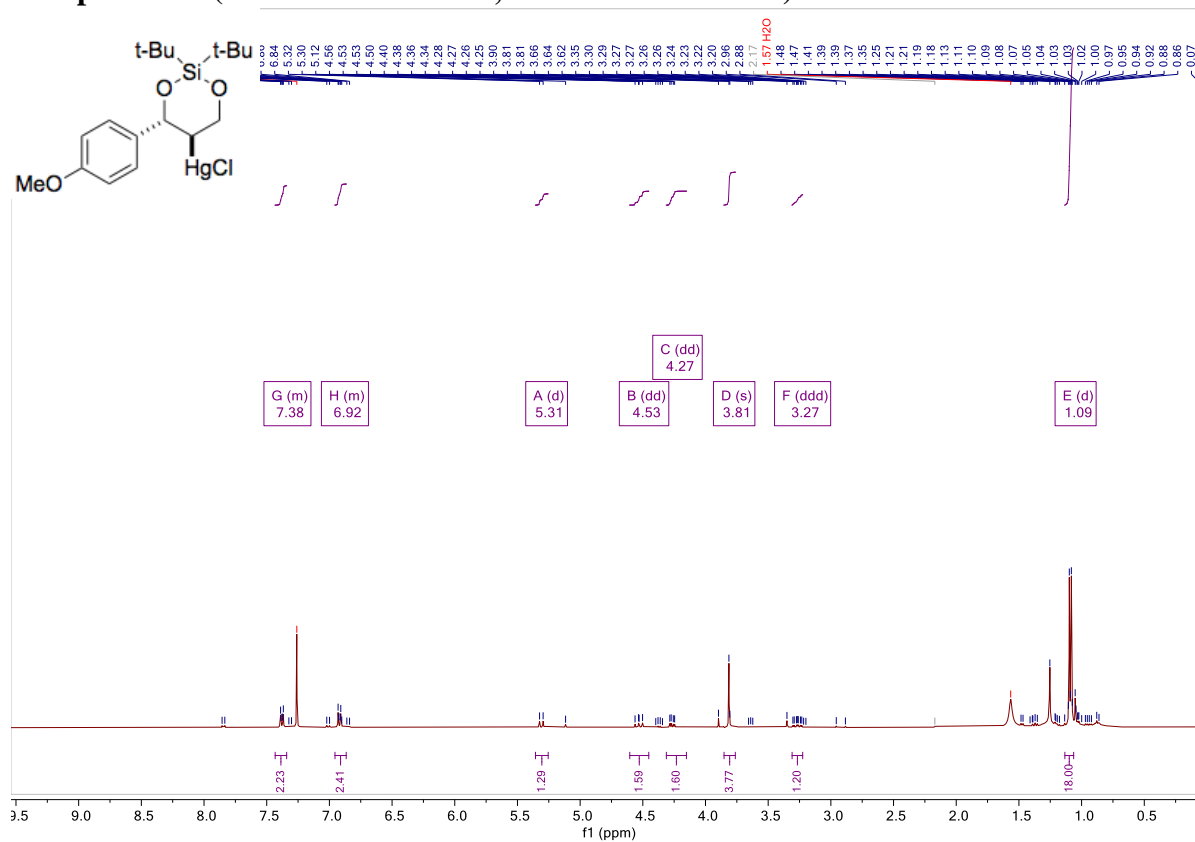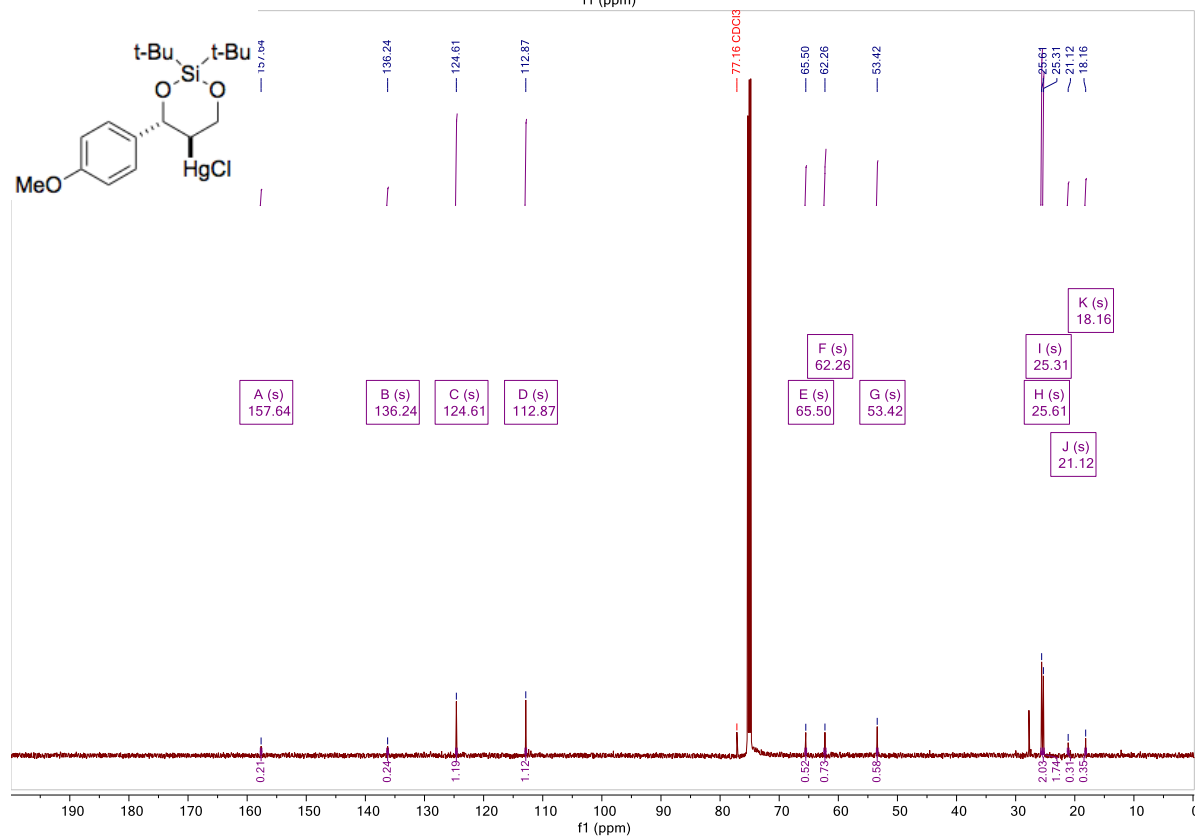

**Compound 33 ( <sup>1</sup>H NMR: 400 MHz, <sup>13</sup>C NMR: 100 MHz)**

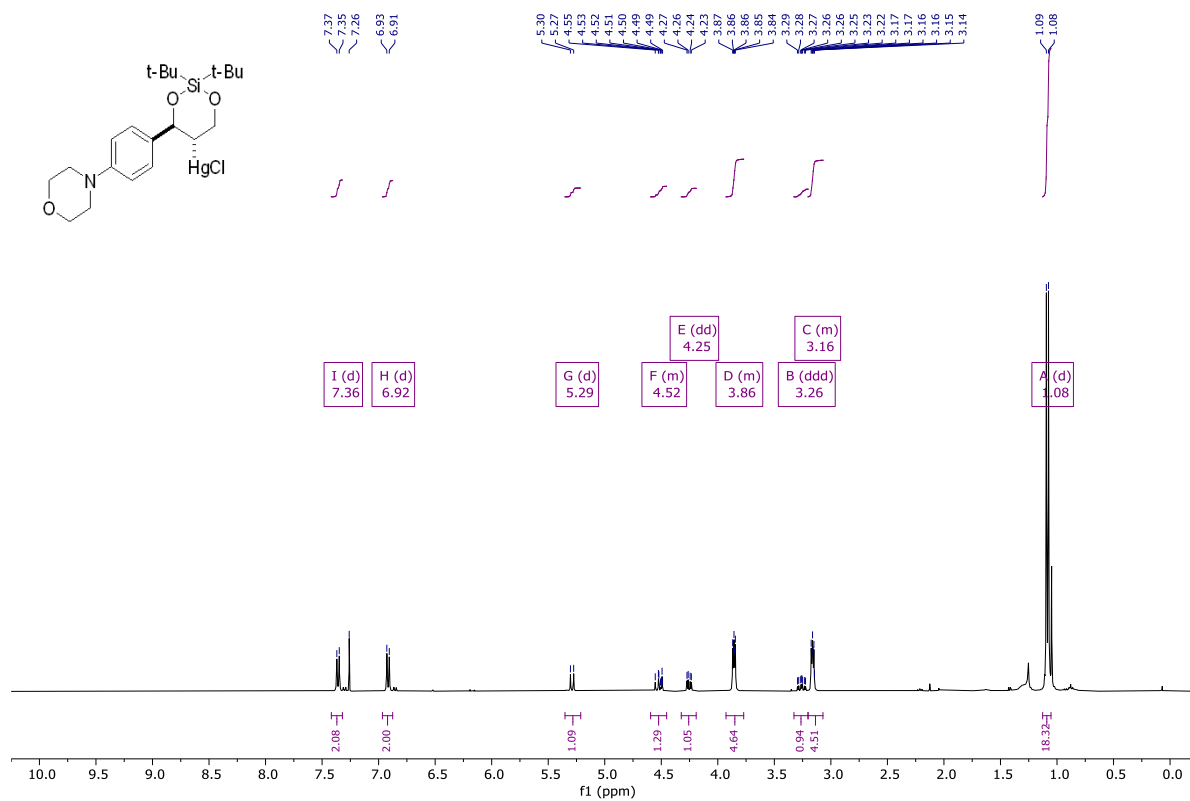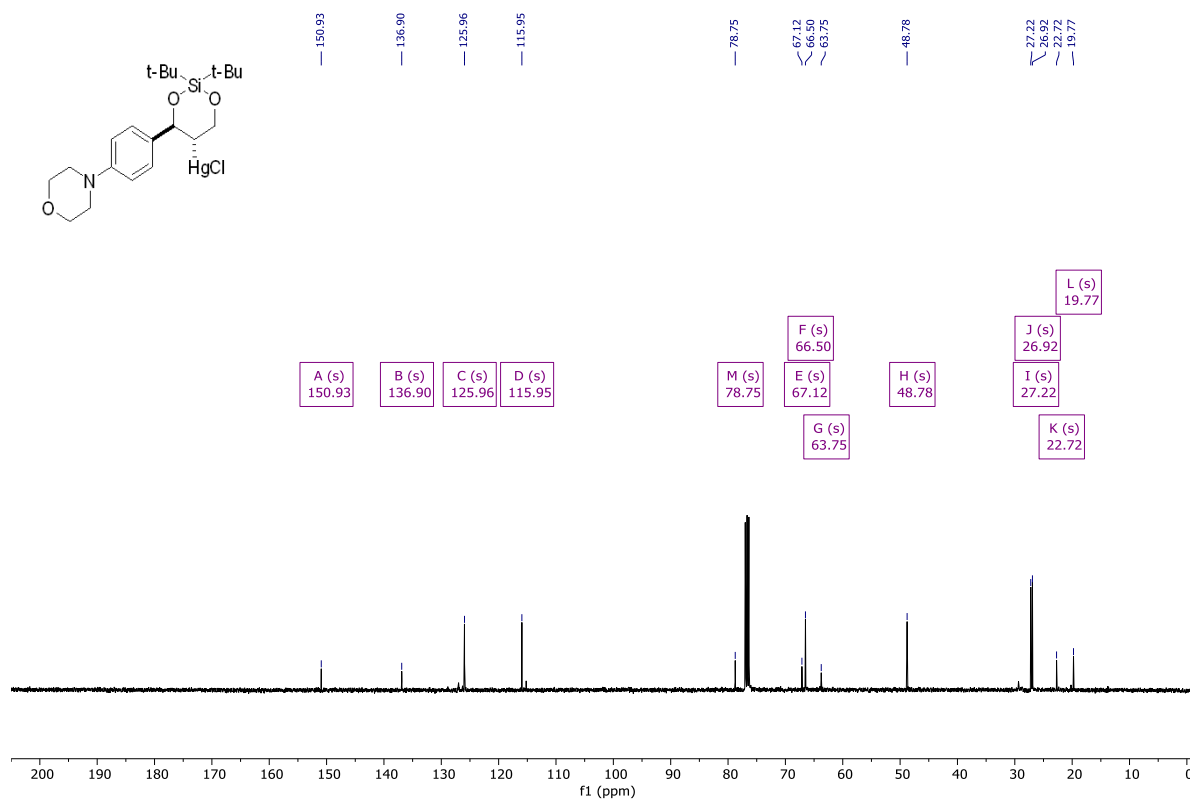

Compound 34 ( $^1\text{H}$  NMR: 400 MHz,  $^{13}\text{C}$  NMR: 100 MHz)

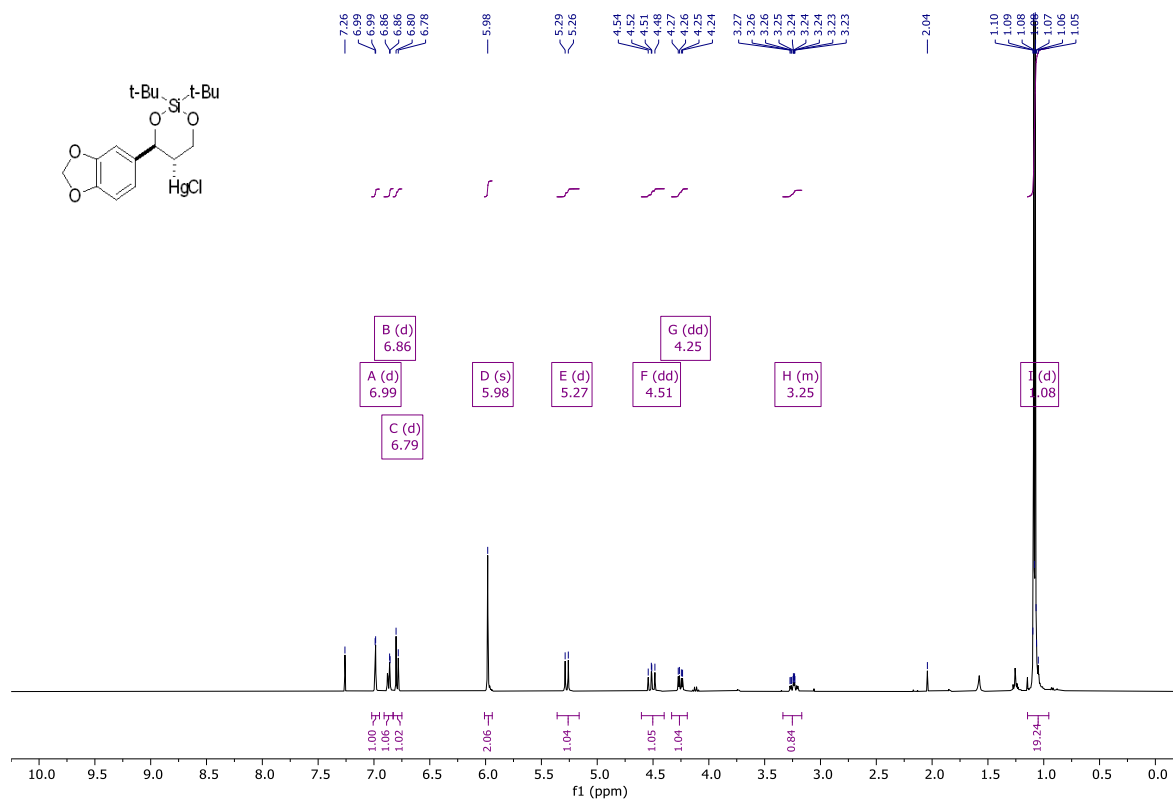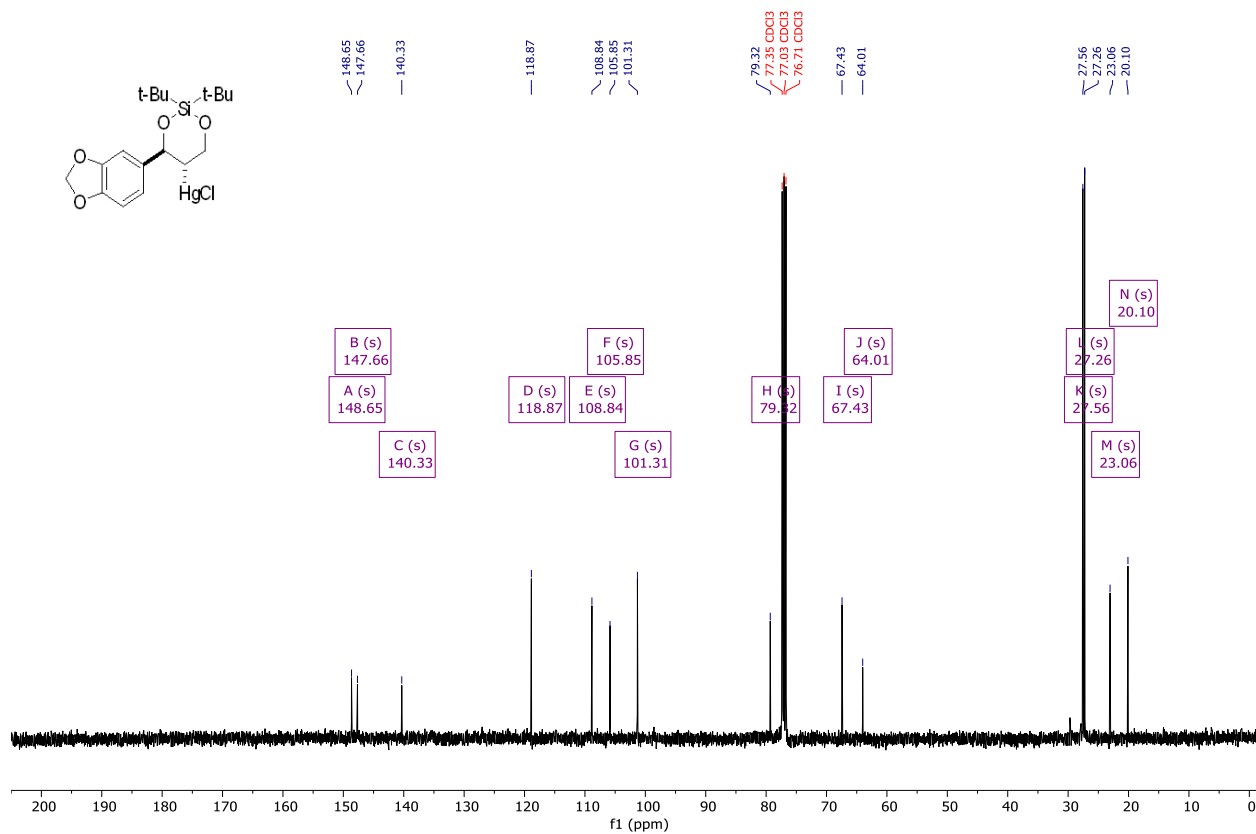



**Compound 35 (<sup>1</sup>H NMR: 400 MHz, <sup>13</sup>C NMR: 100 MHz)**

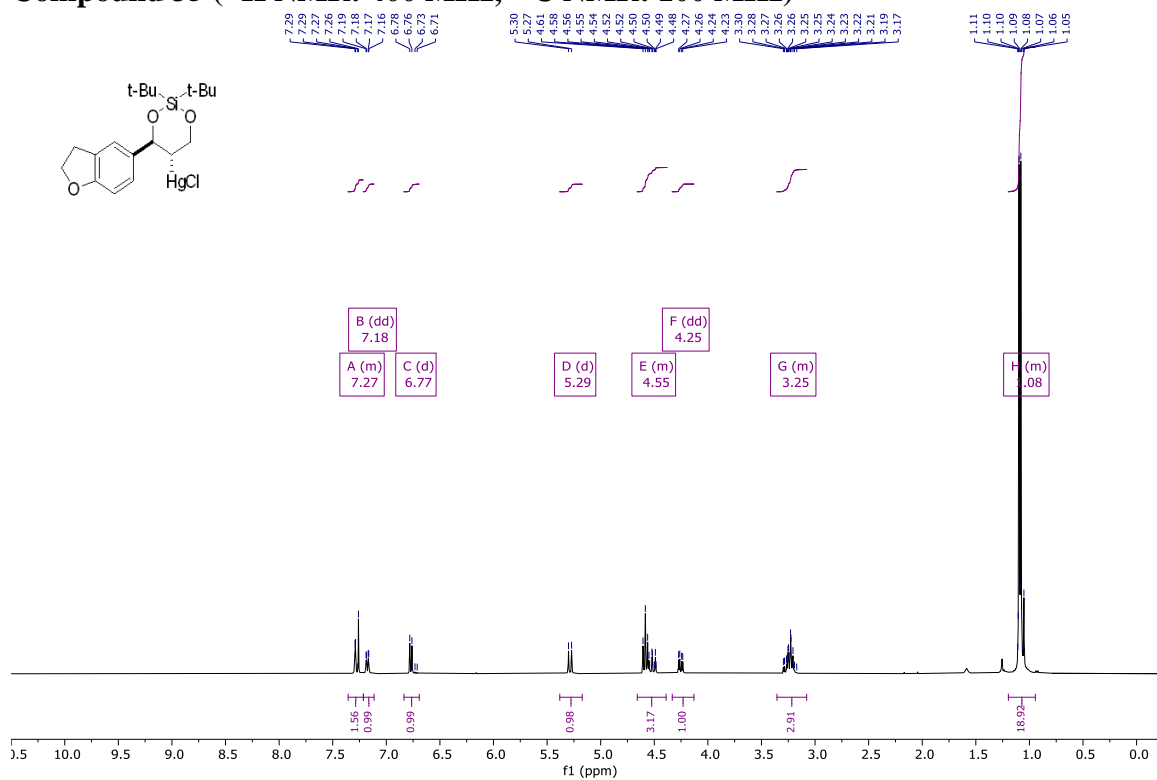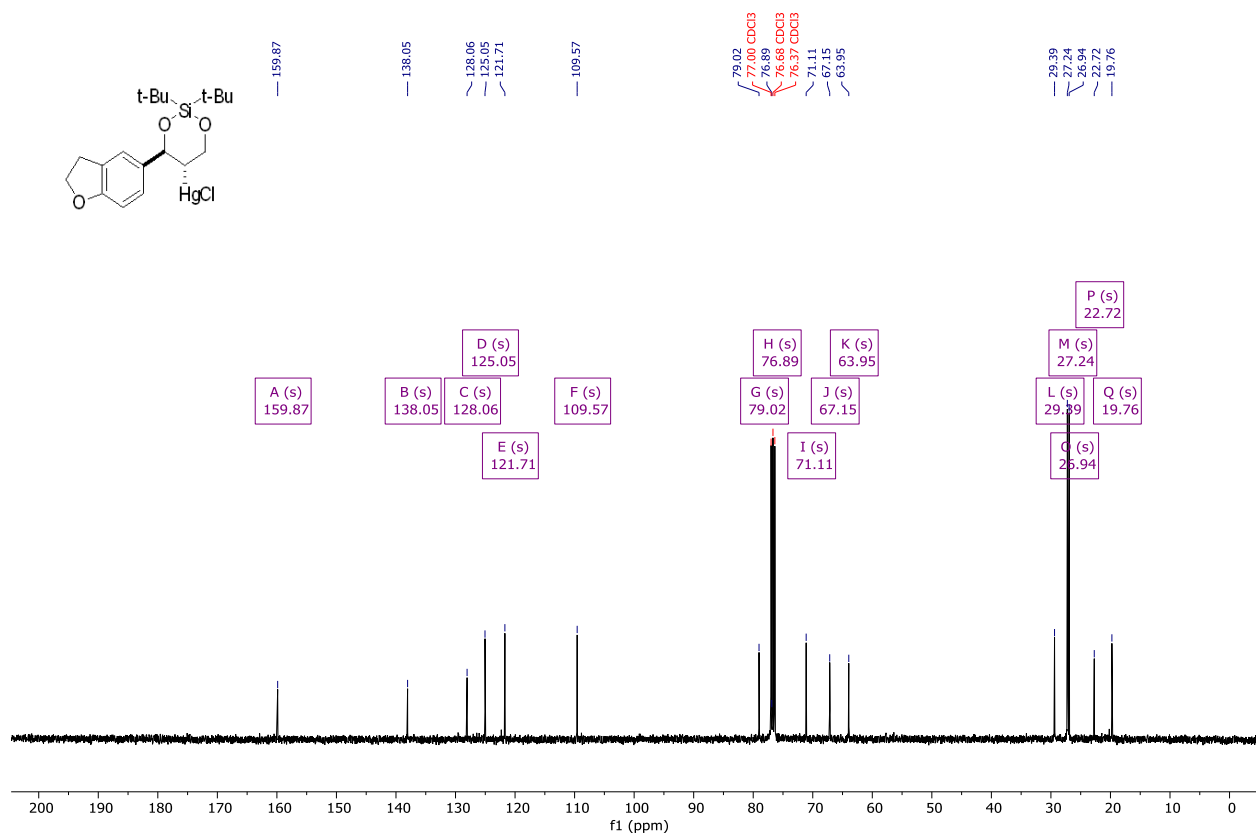

Compound 36 ( $^1\text{H}$  NMR: 400 MHz,  $^{13}\text{C}$  NMR: 100 MHz)

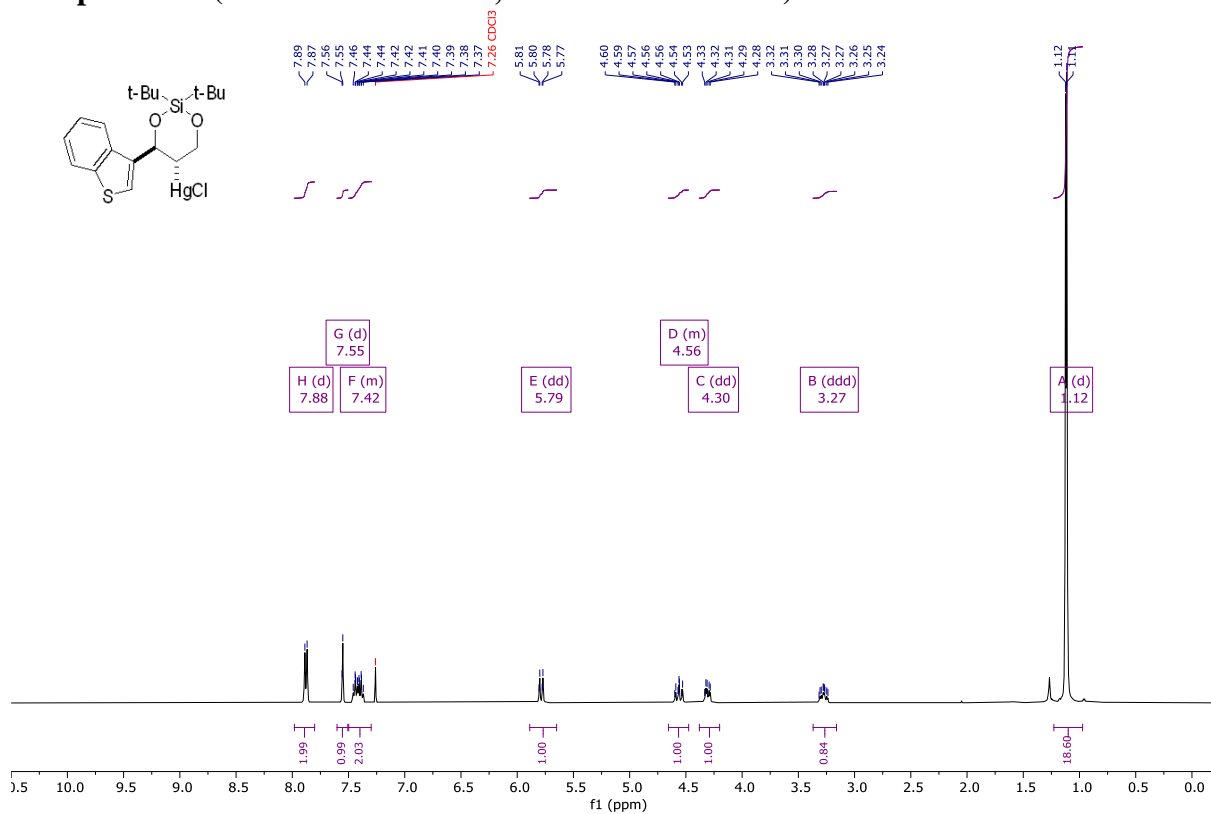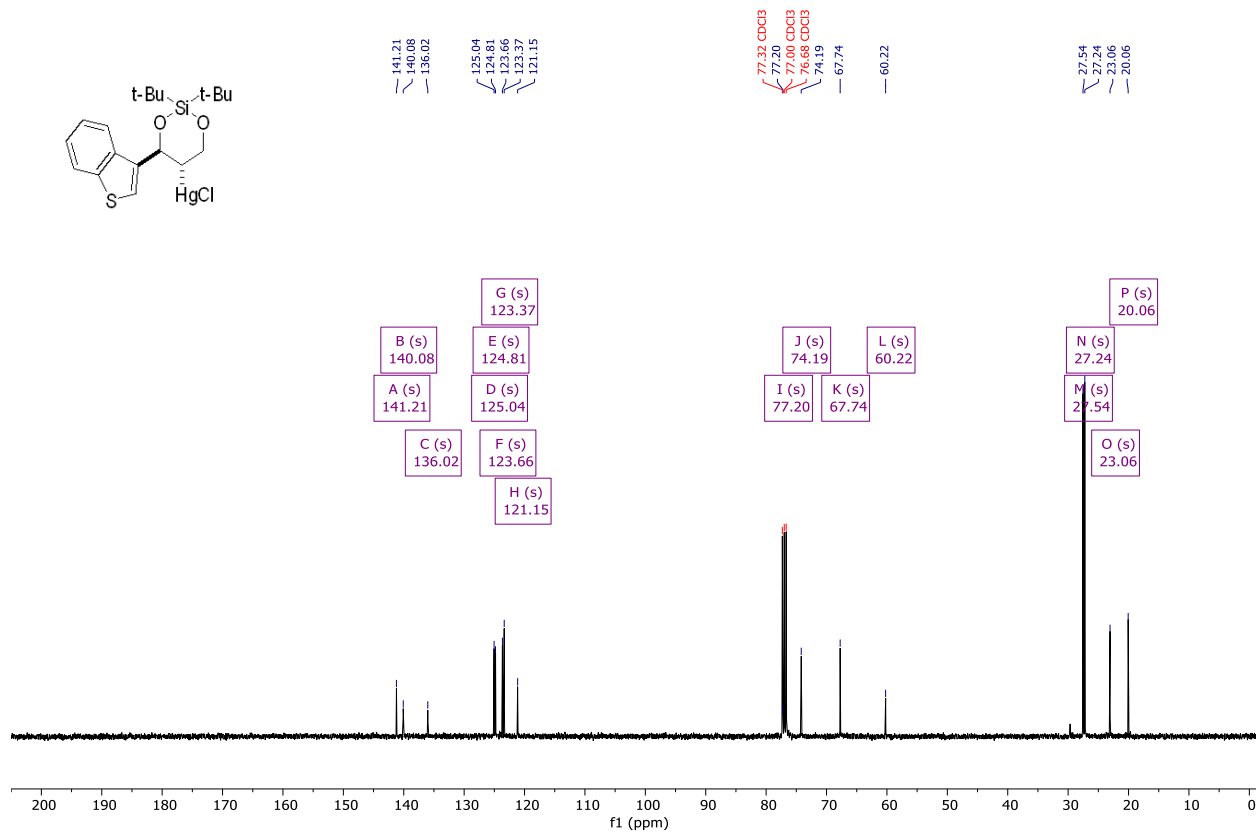

**Compound 37 ( <sup>1</sup>H NMR: 400 MHz, <sup>13</sup>C NMR: 100 MHz)**

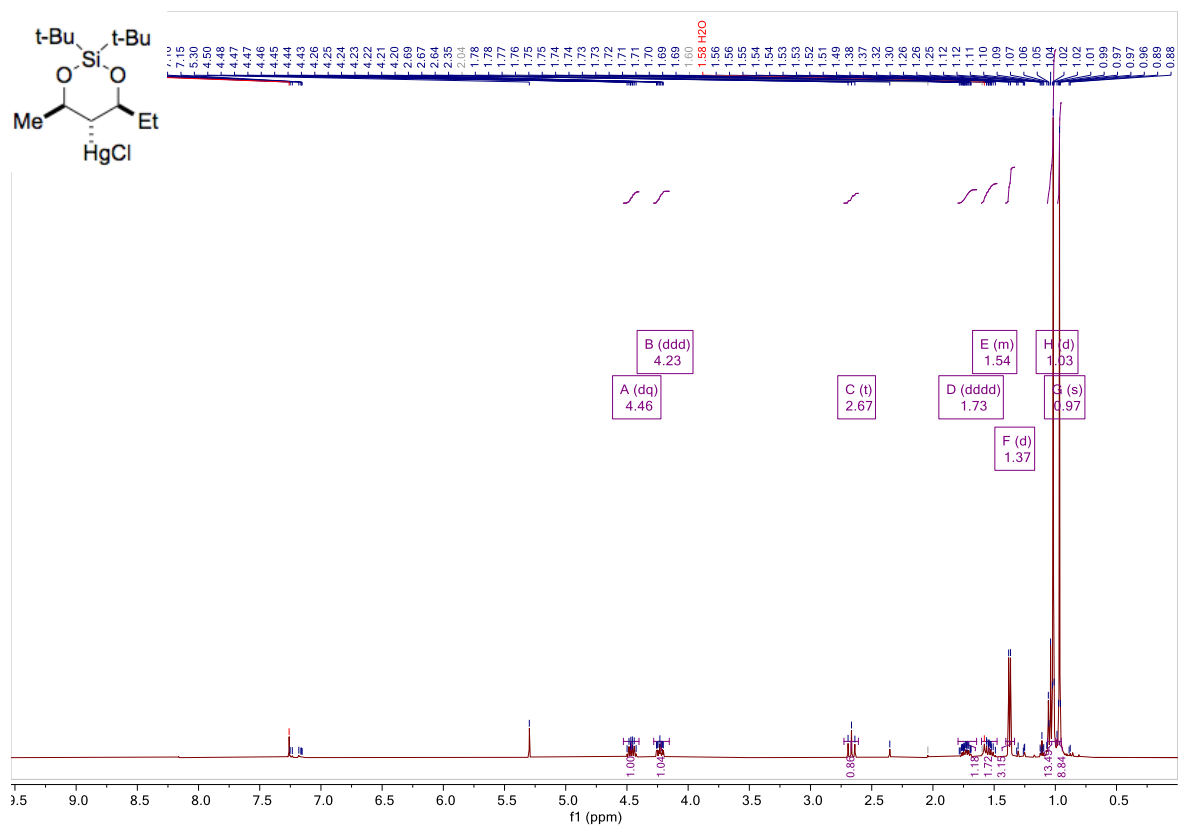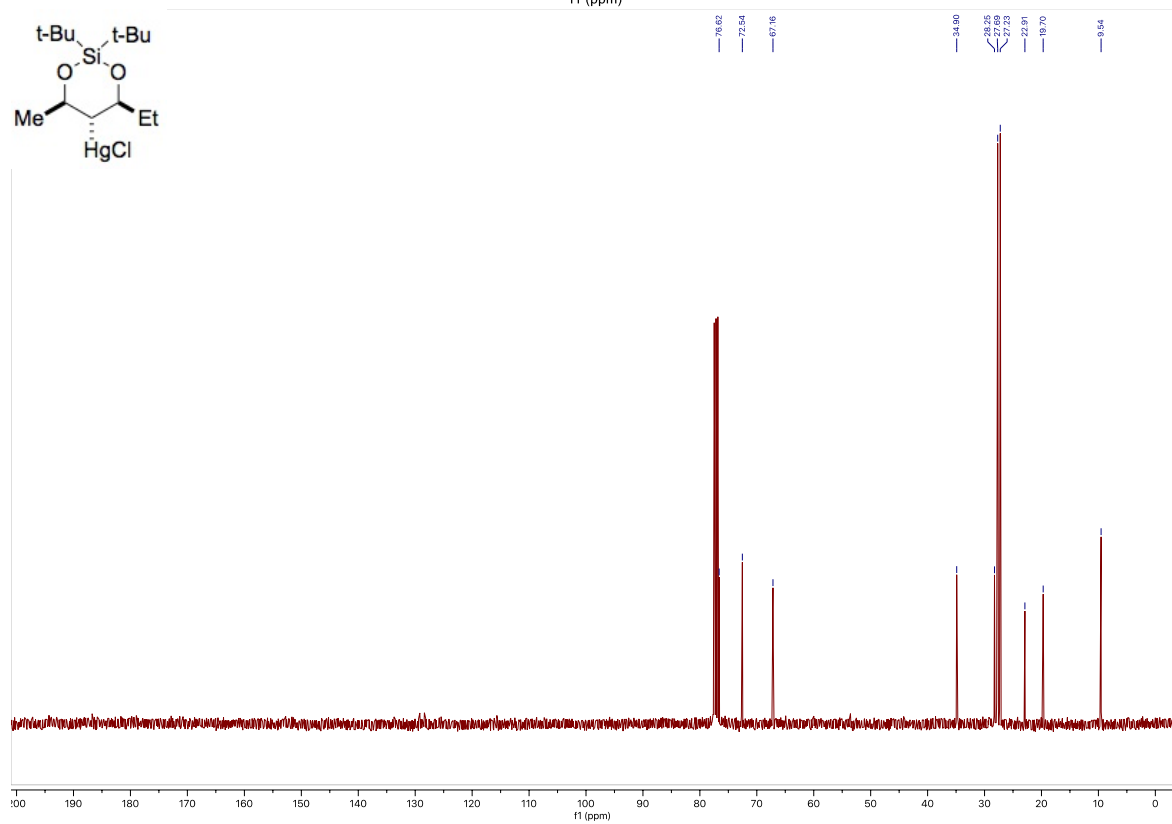

# NOESY

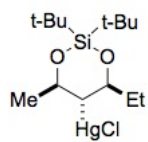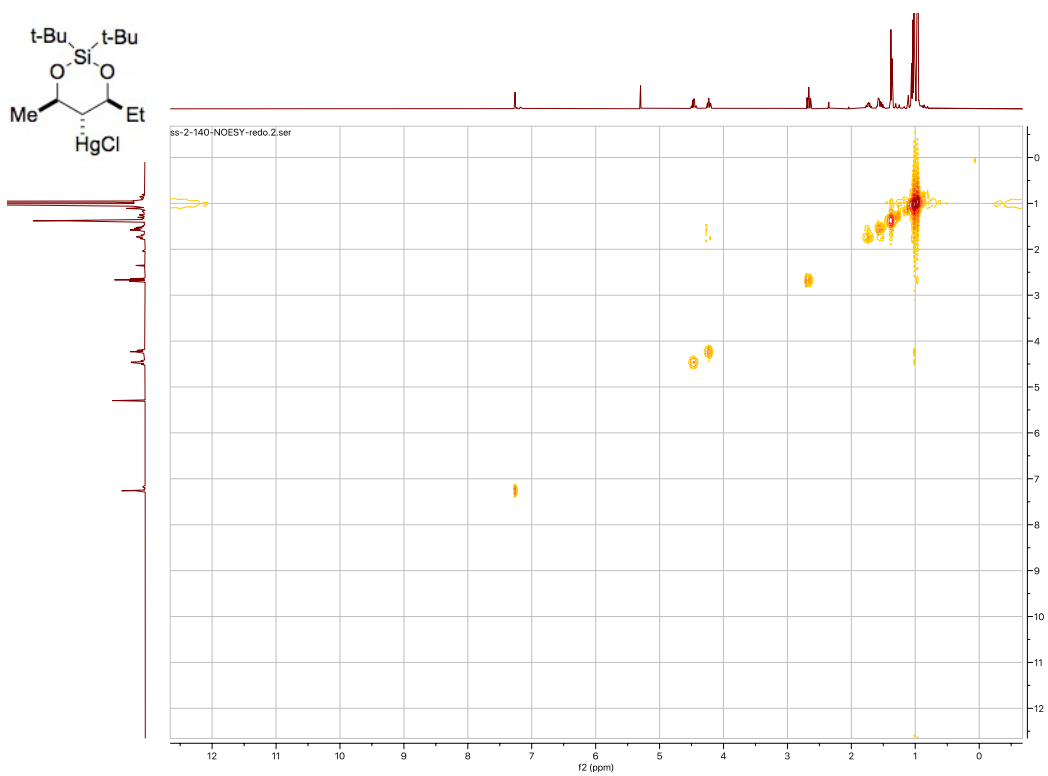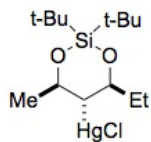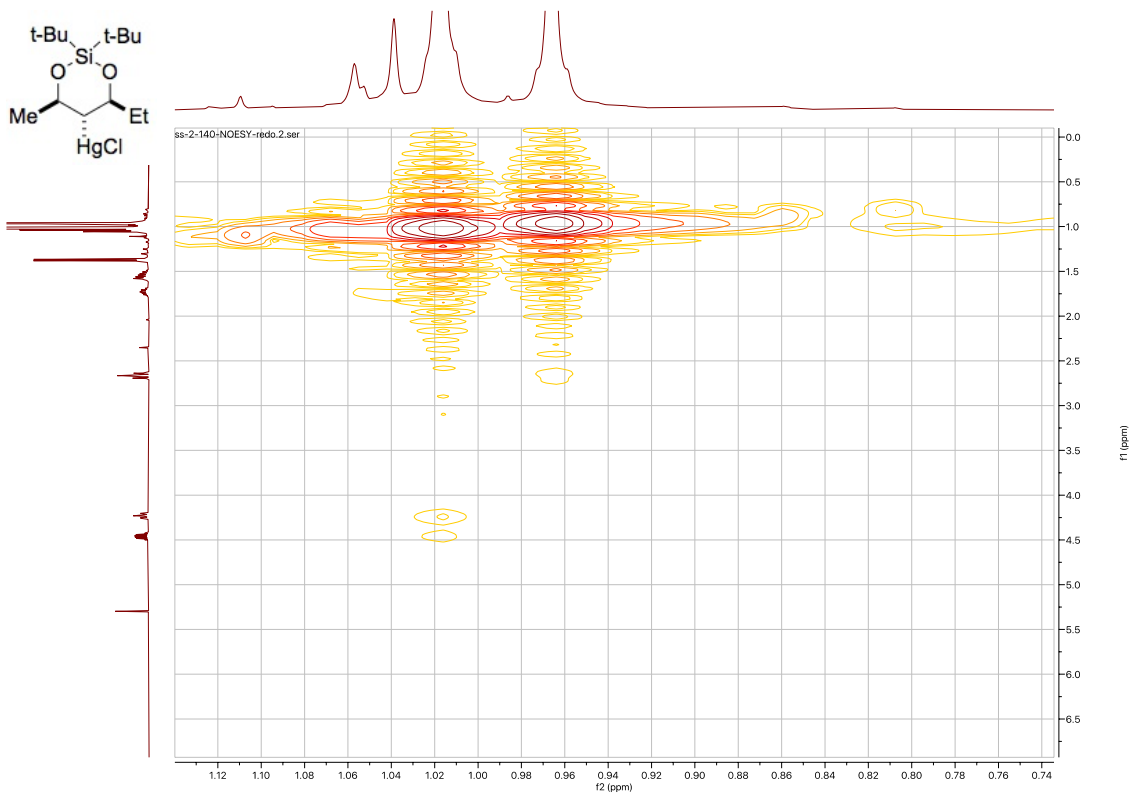

# COSY

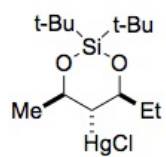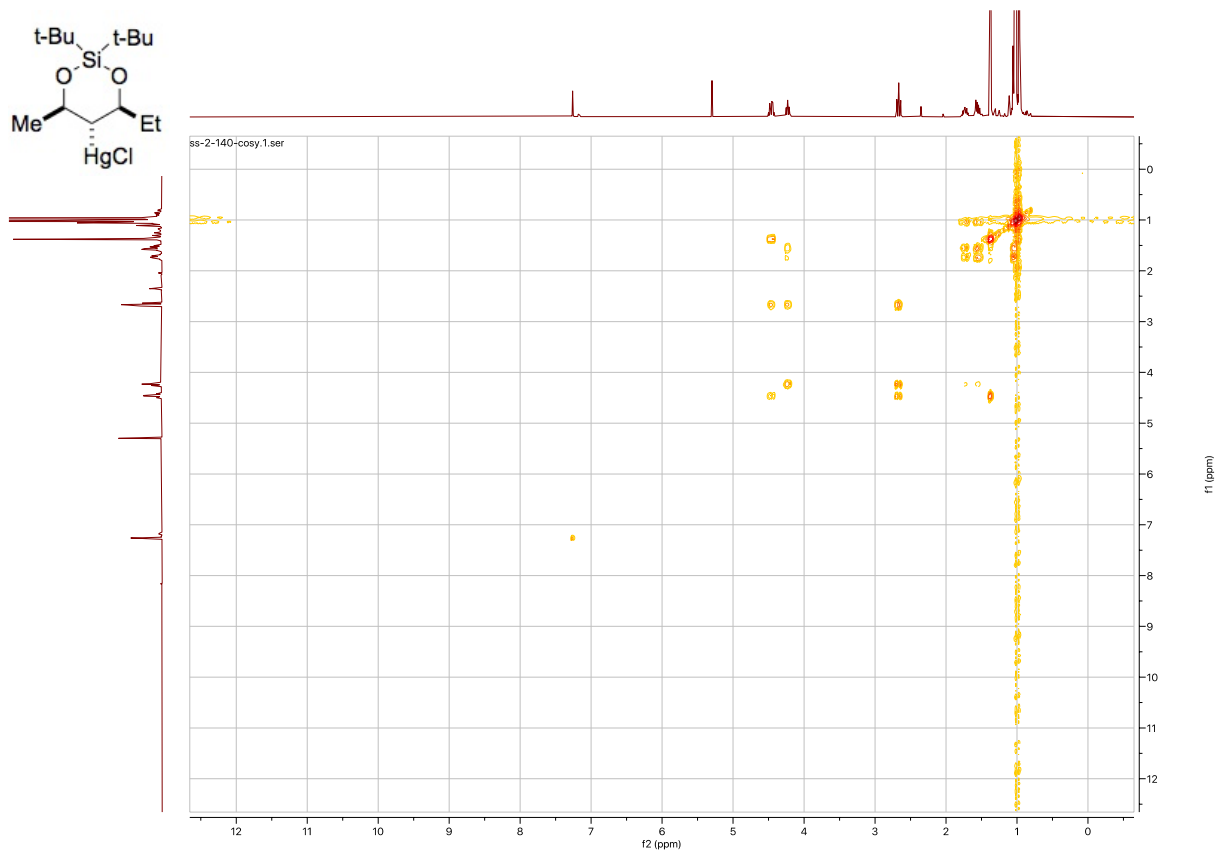

Compound 38 (<sup>1</sup>H NMR: 400 MHz, <sup>13</sup>C NMR: 100 MHz)

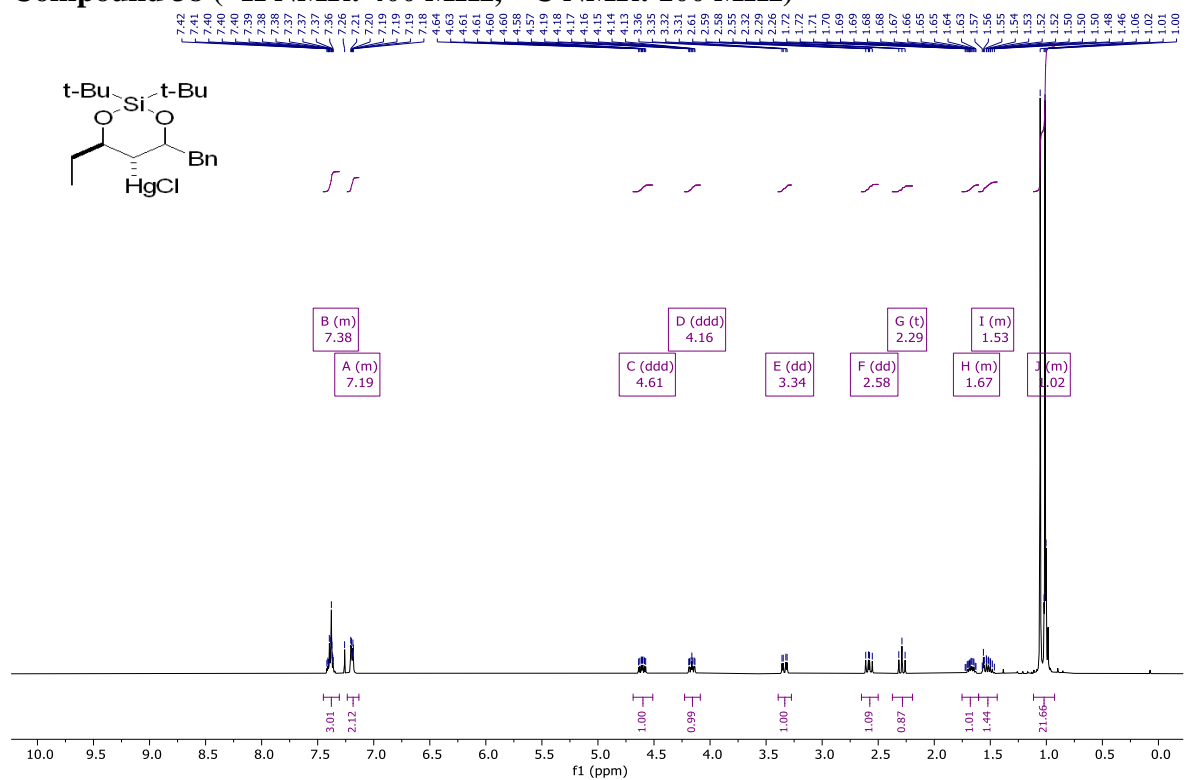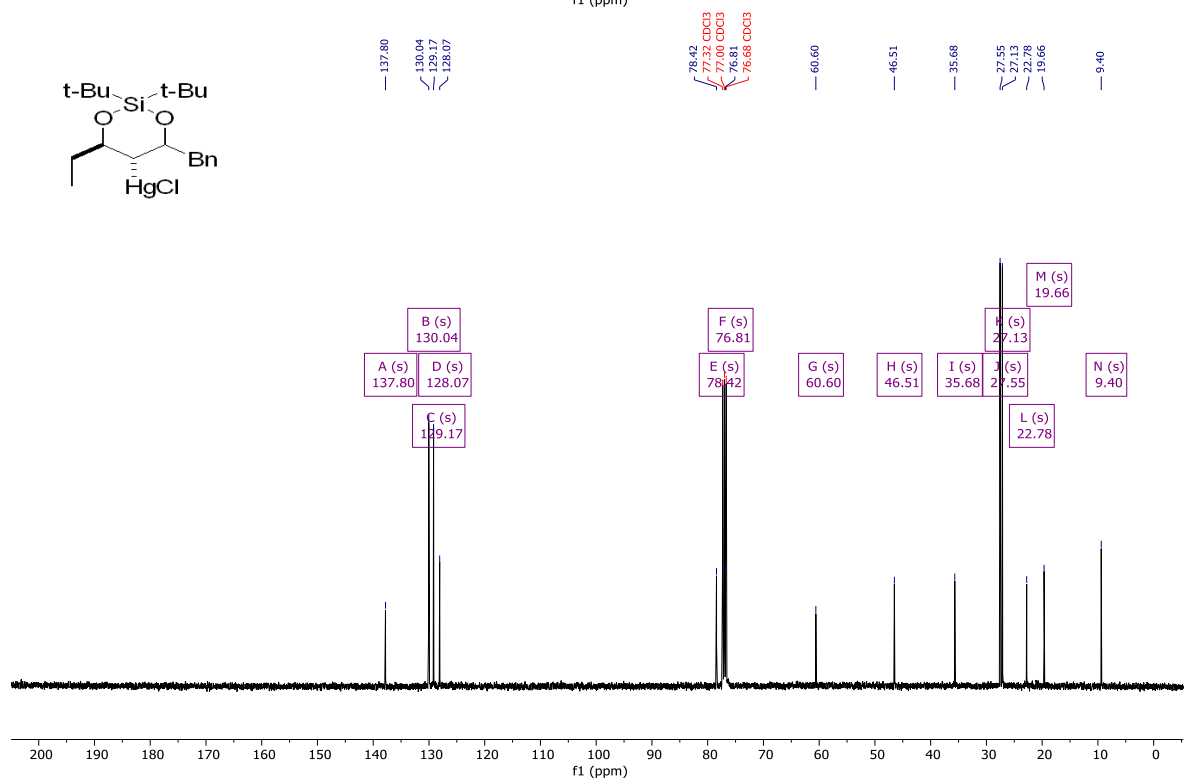

Compound 39 ( $^1\text{H}$  NMR: 400 MHz,  $^{13}\text{C}$  NMR: 100 MHz)

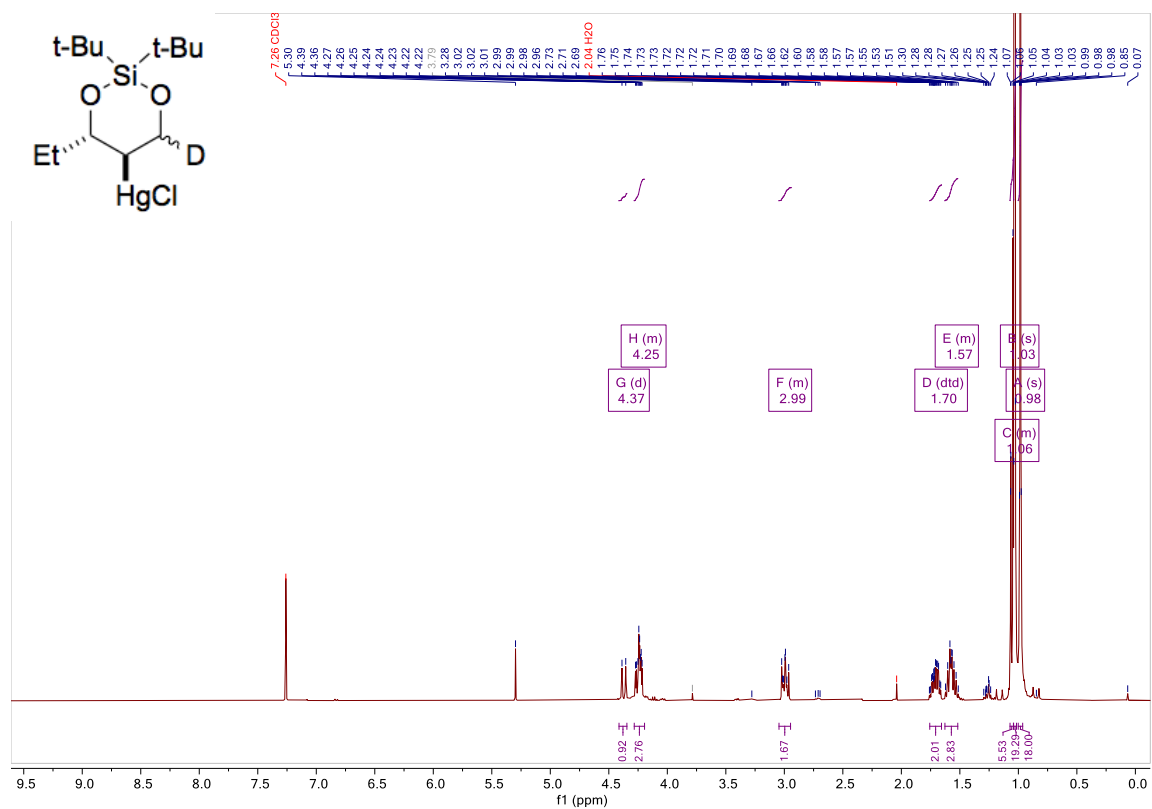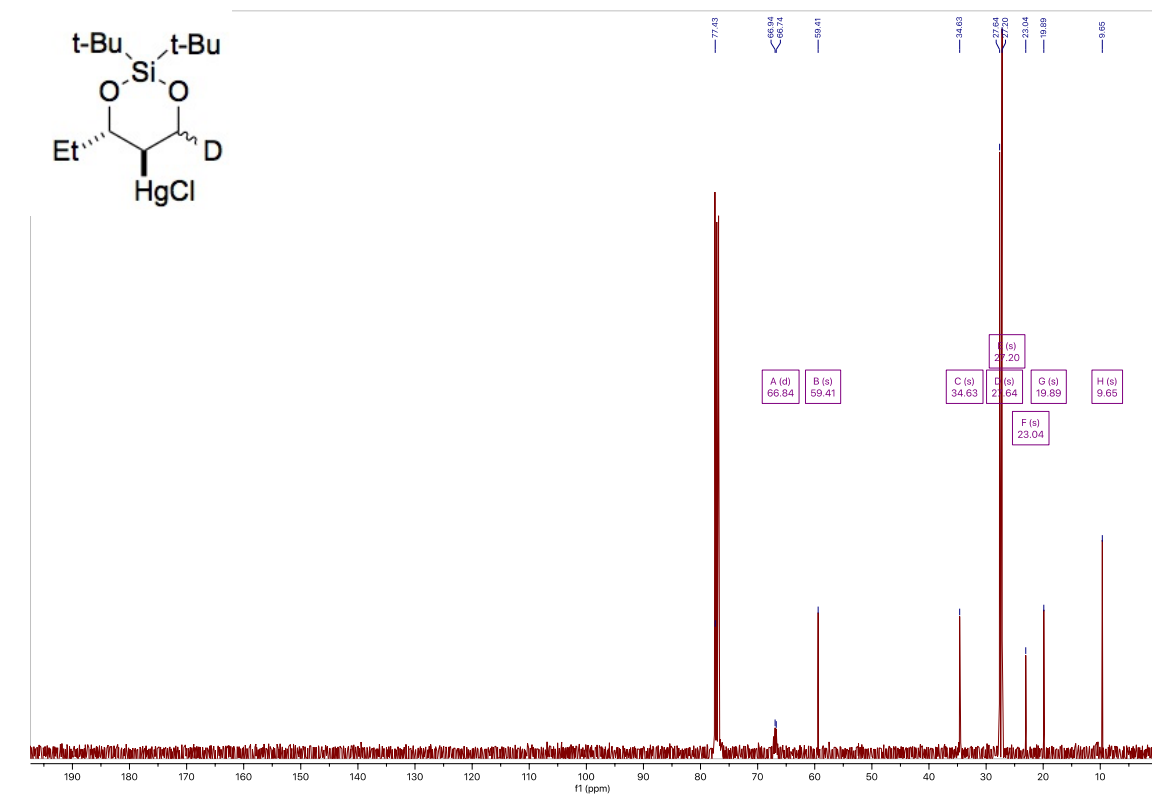

# HSQC

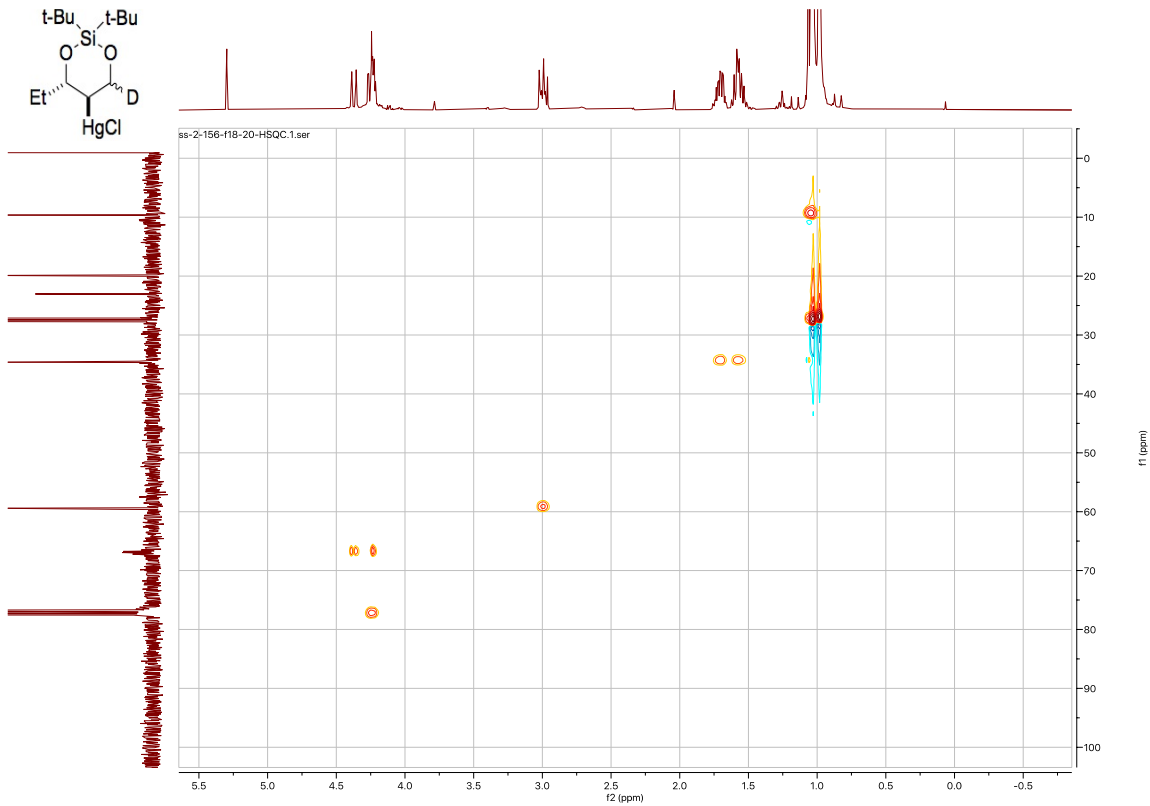



Compound 40 ( $^1\text{H}$  NMR: 400 MHz,  $^{13}\text{C}$  NMR: 100 MHz)

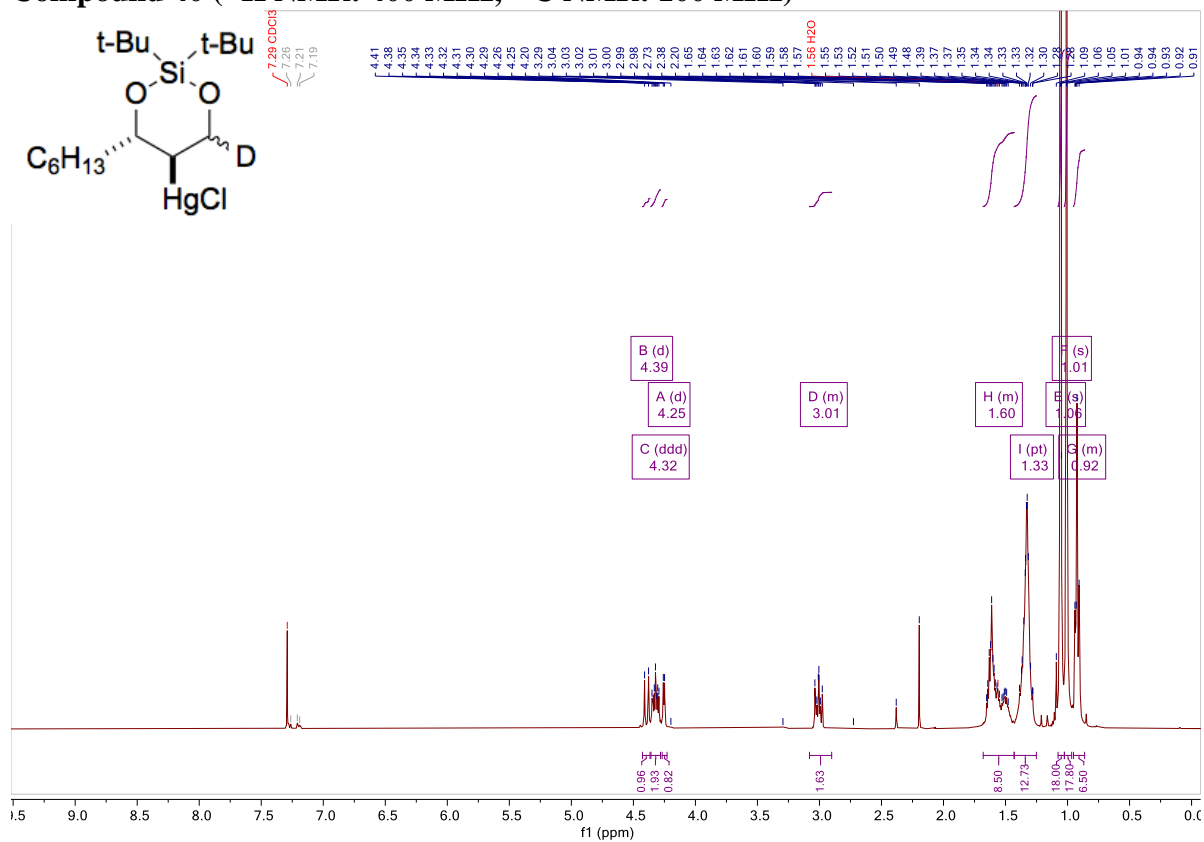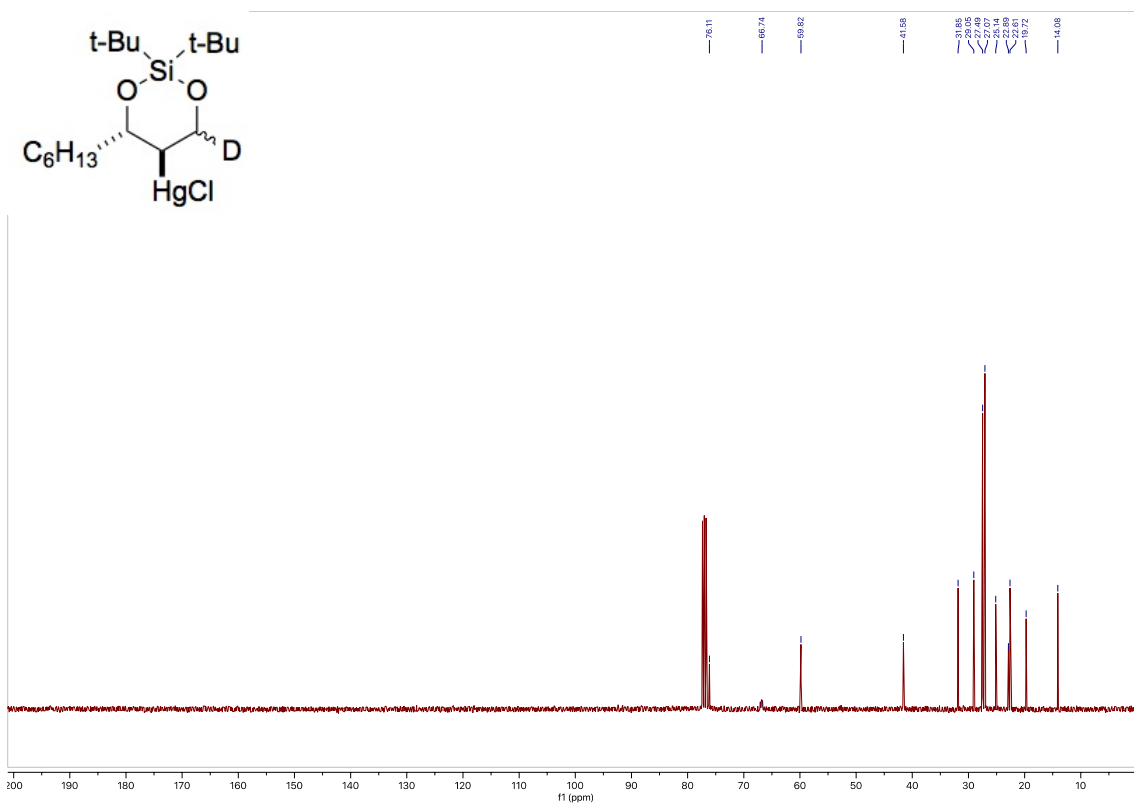

Compound 41 ( $^1\text{H}$  NMR: 400 MHz,  $^{13}\text{C}$  NMR: 100 MHz)

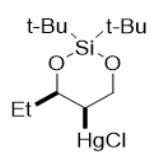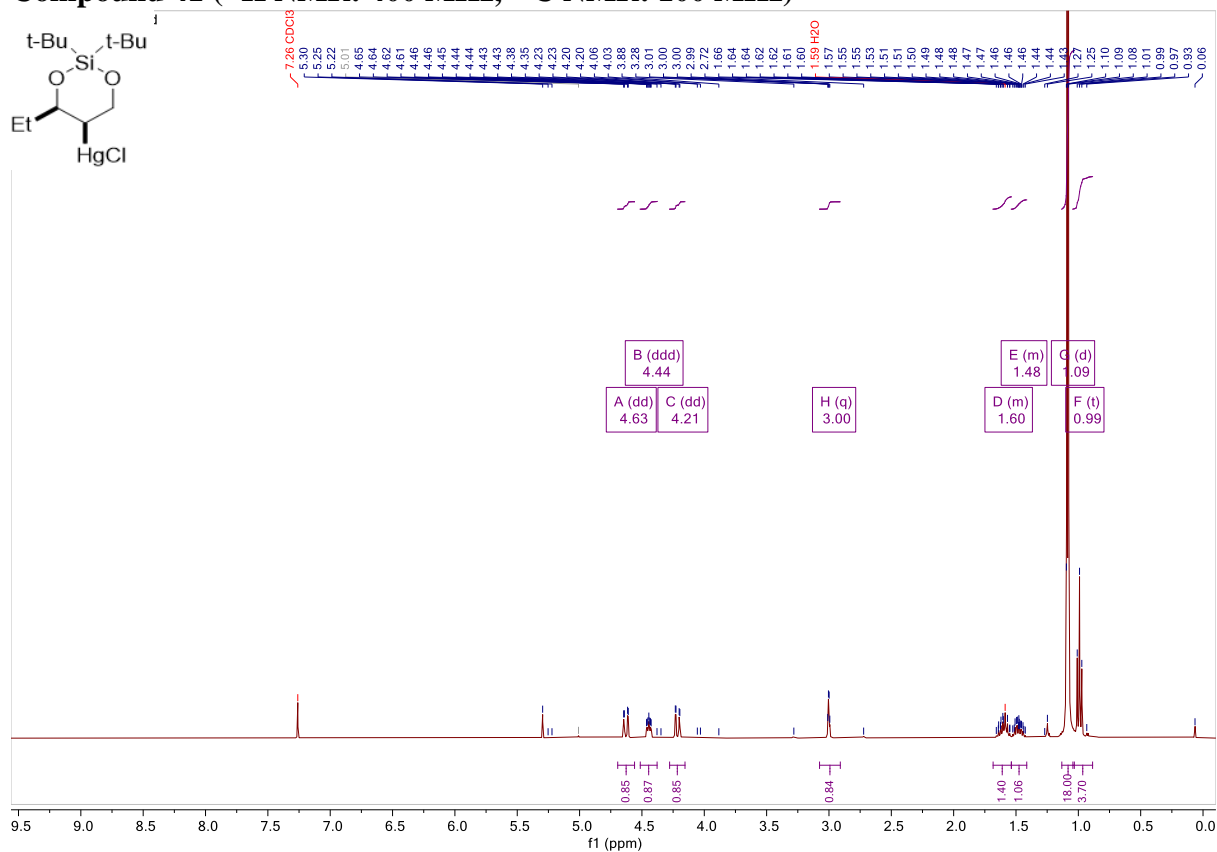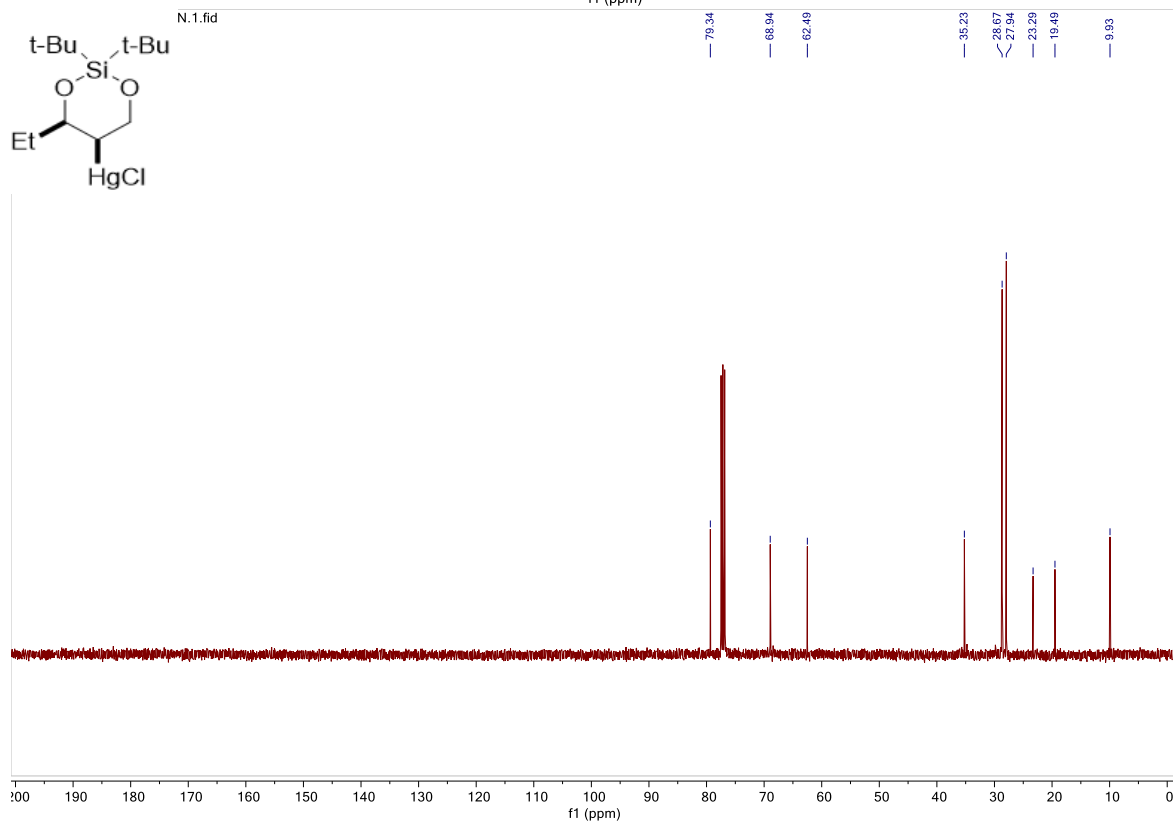

Compound 42 ( $^1\text{H}$  NMR: 400 MHz,  $^{13}\text{C}$  NMR: 100 MHz)

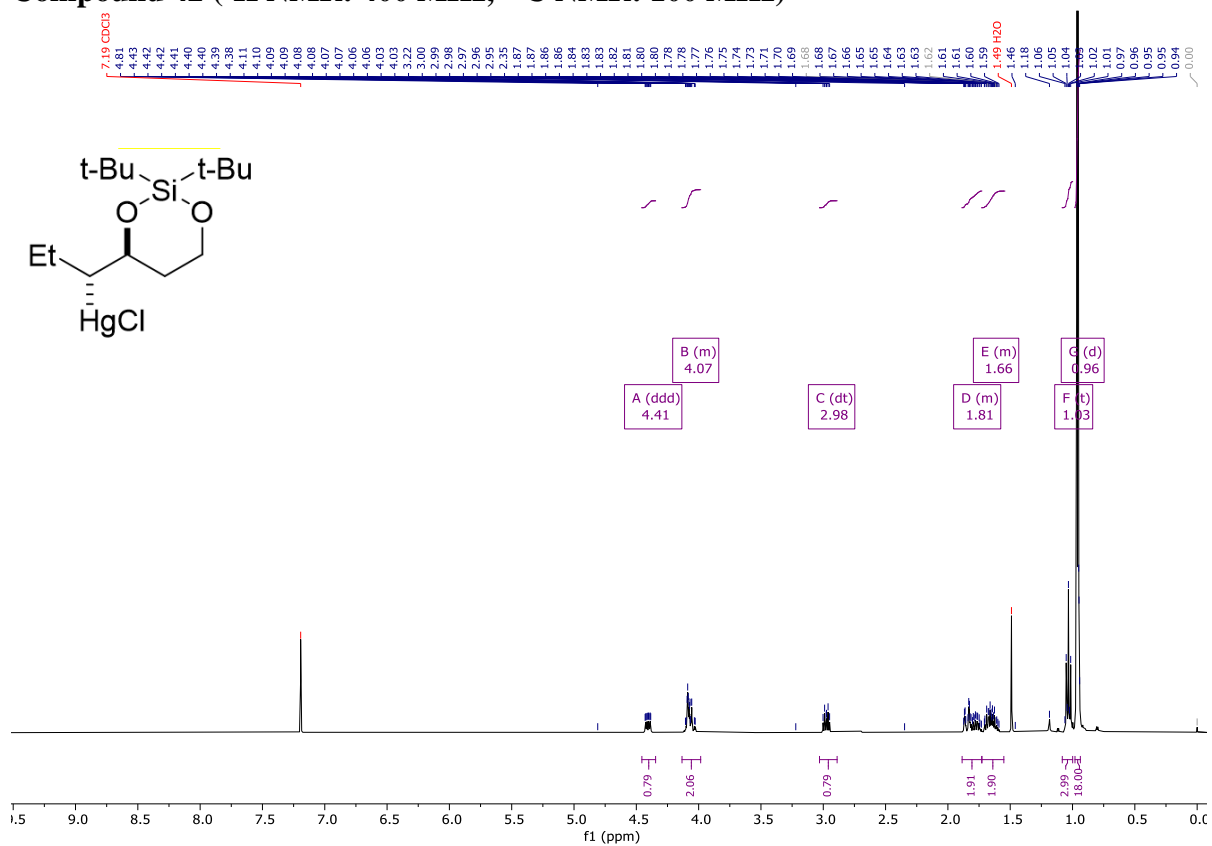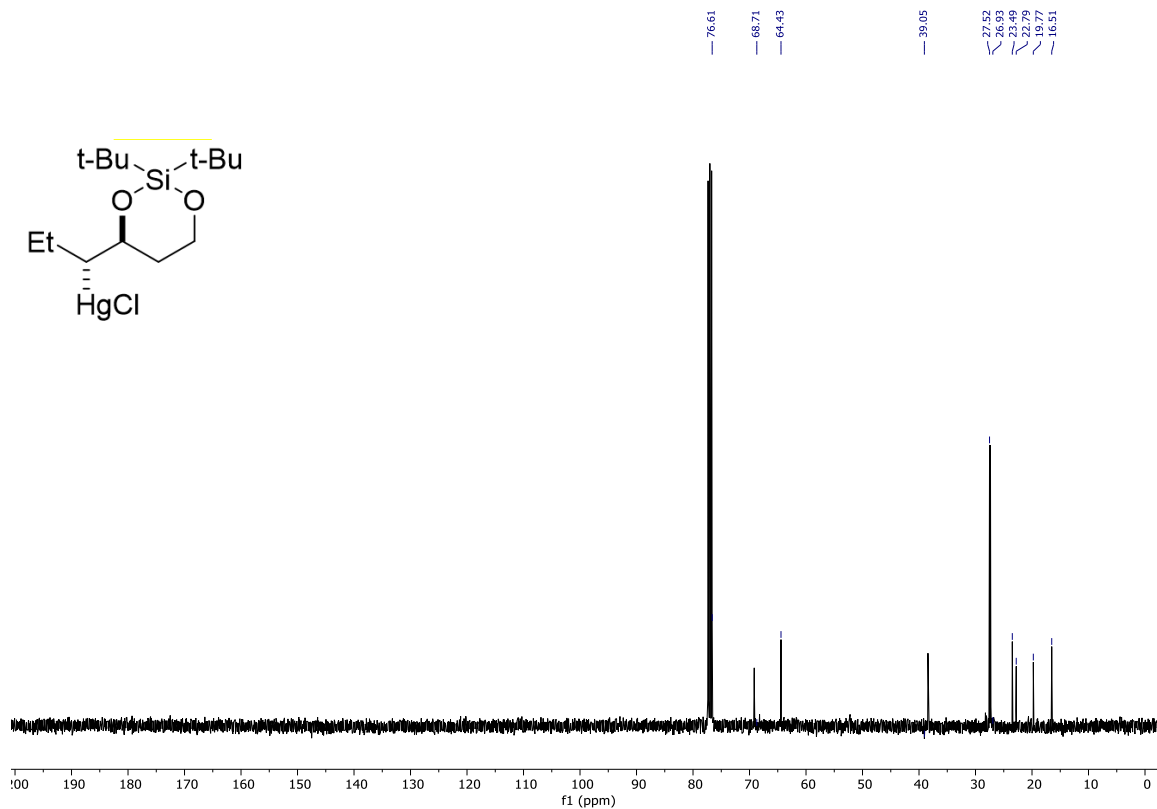

# HSQC

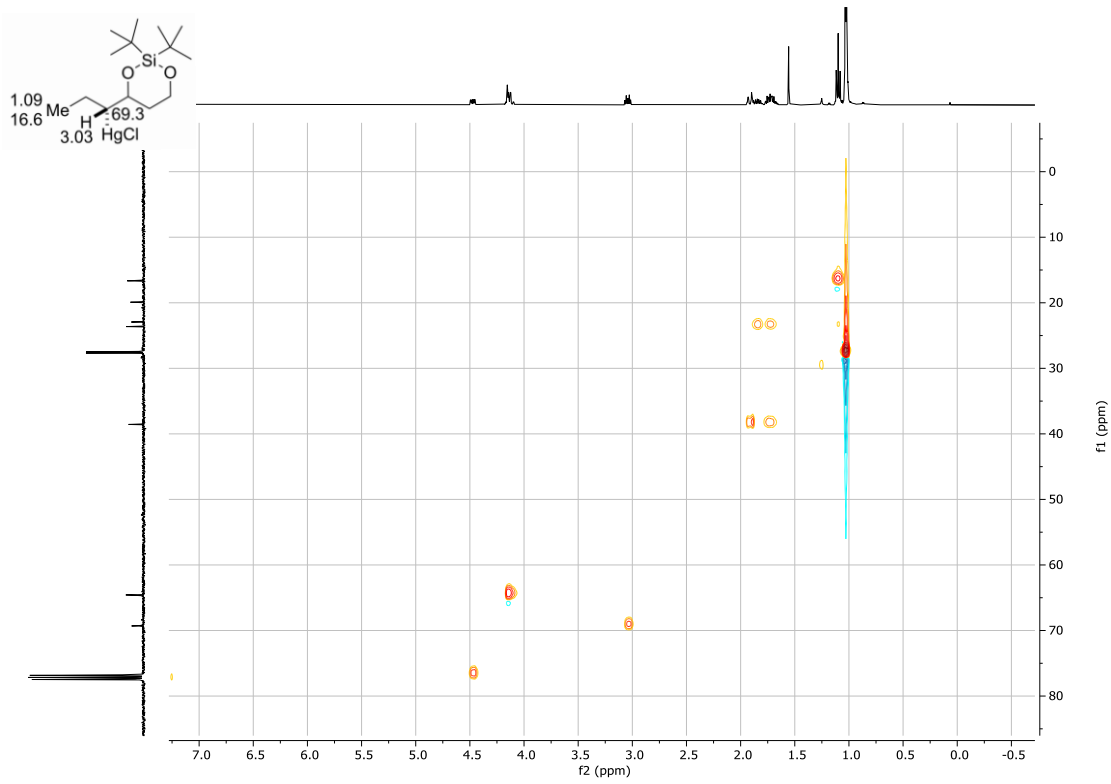

# HMBC

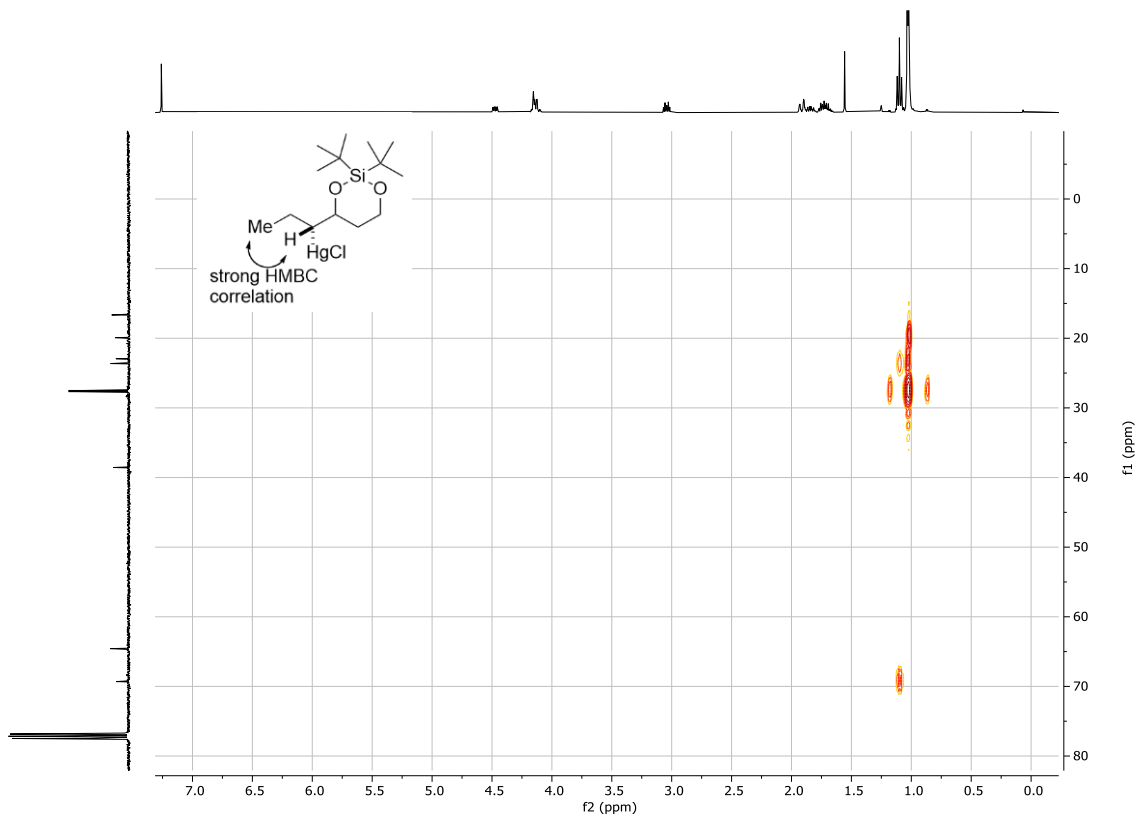

# Compound 43 (400 Mhz, 100 Mhz)

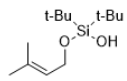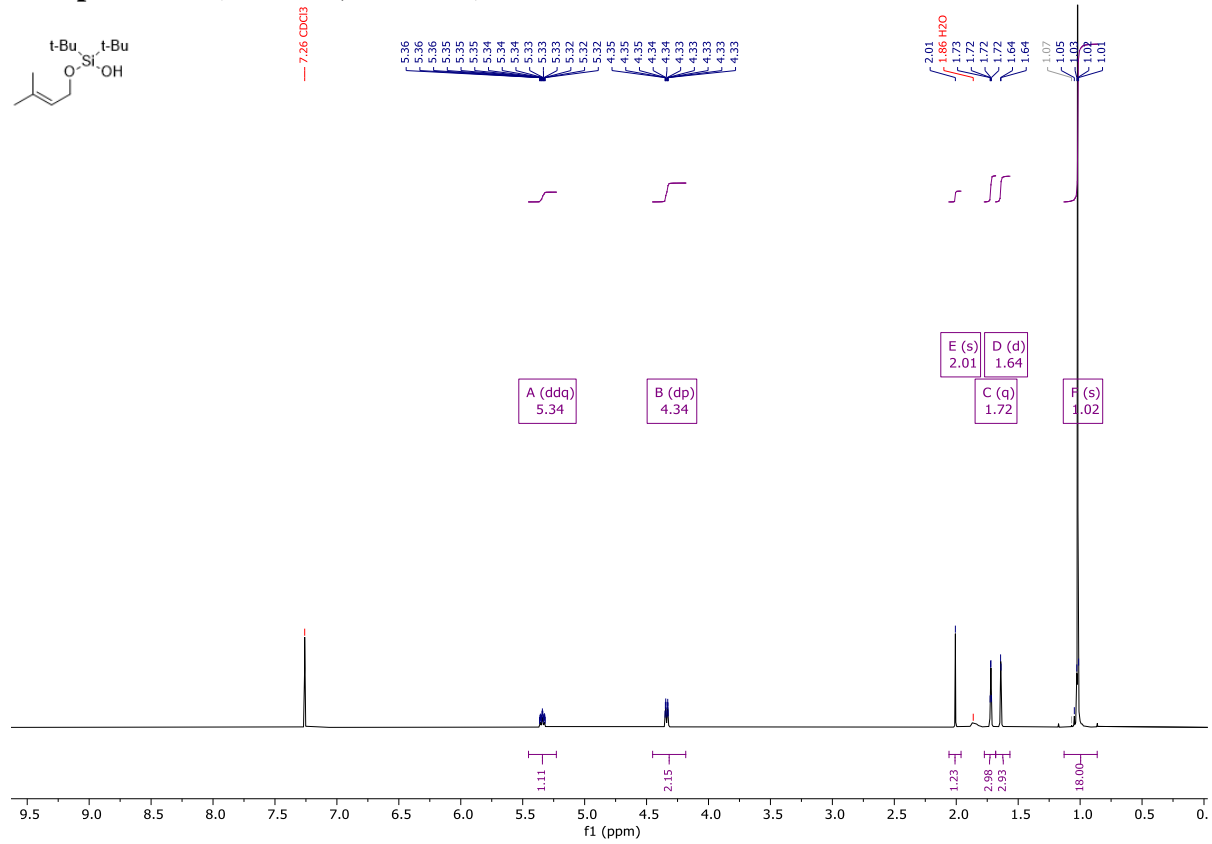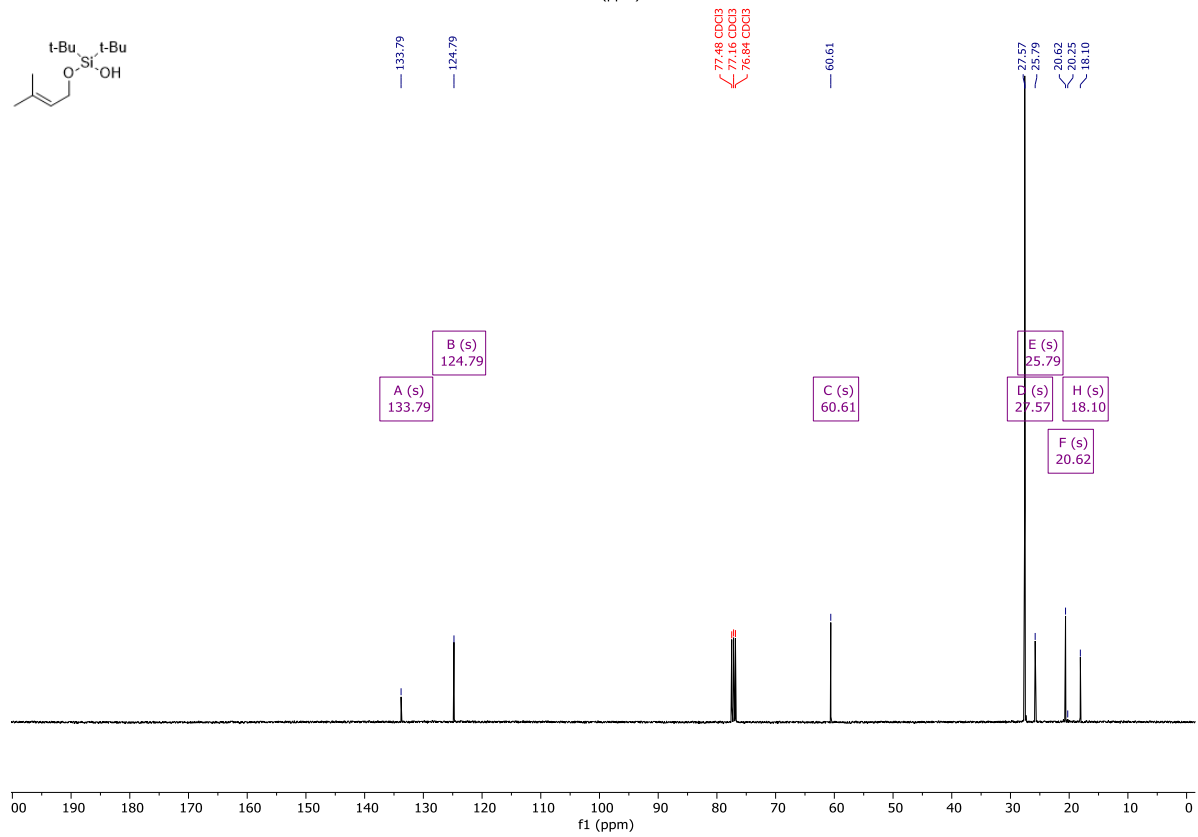

# Compound 44 (400 Mhz, 100 Mhz)

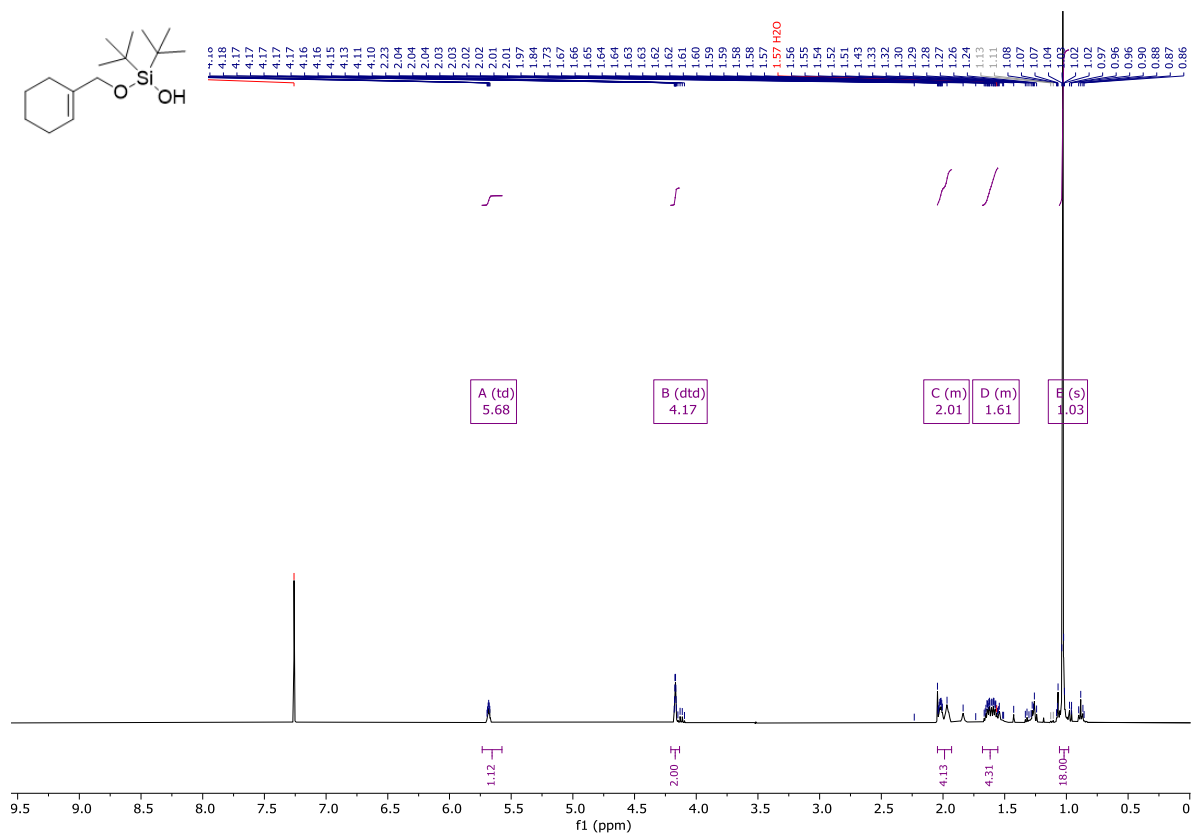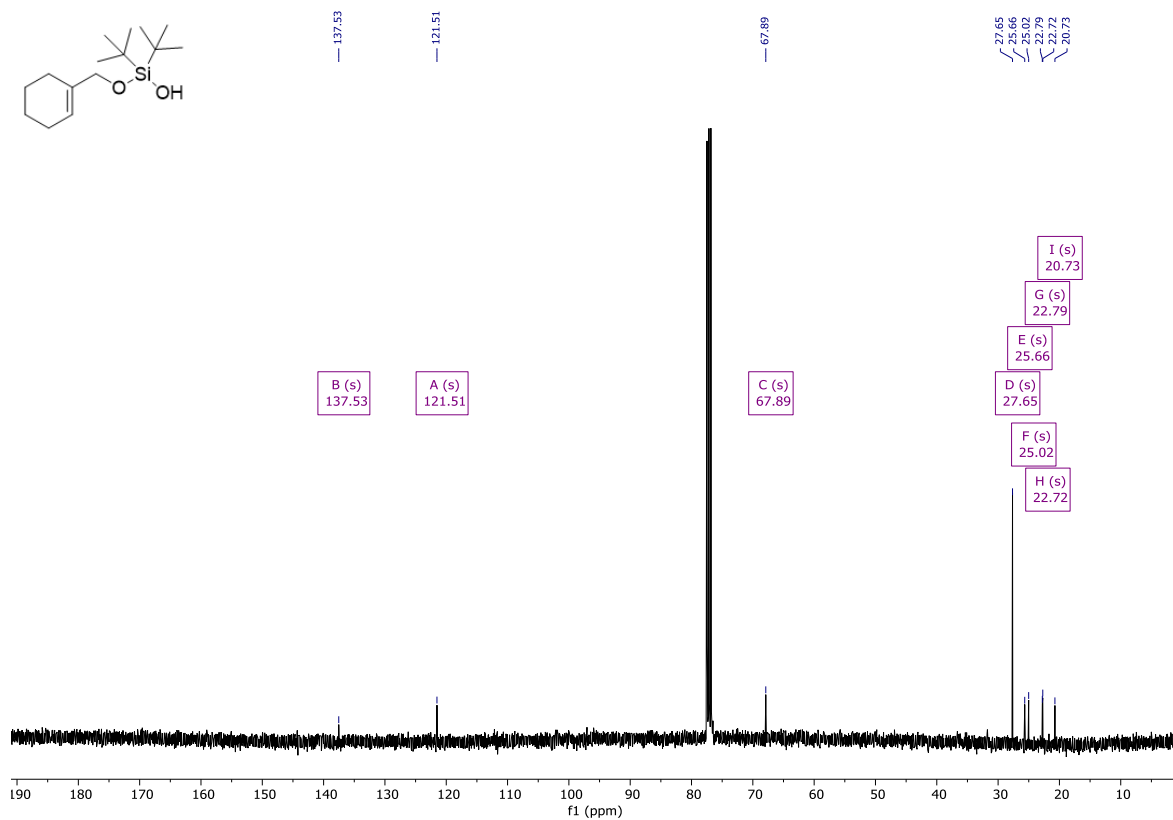

**Compound 45 (400 Mhz, 100 Mhz)**

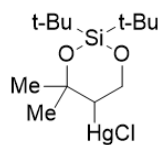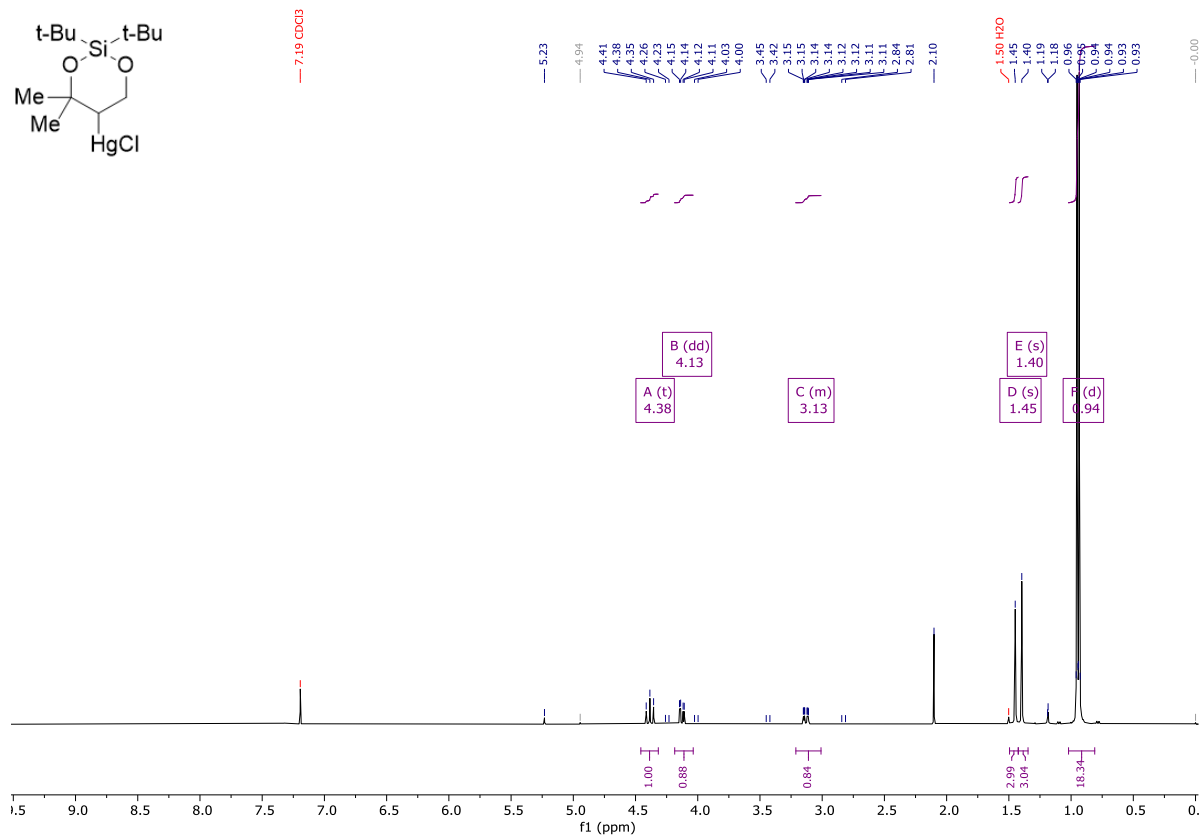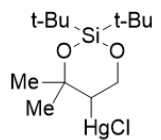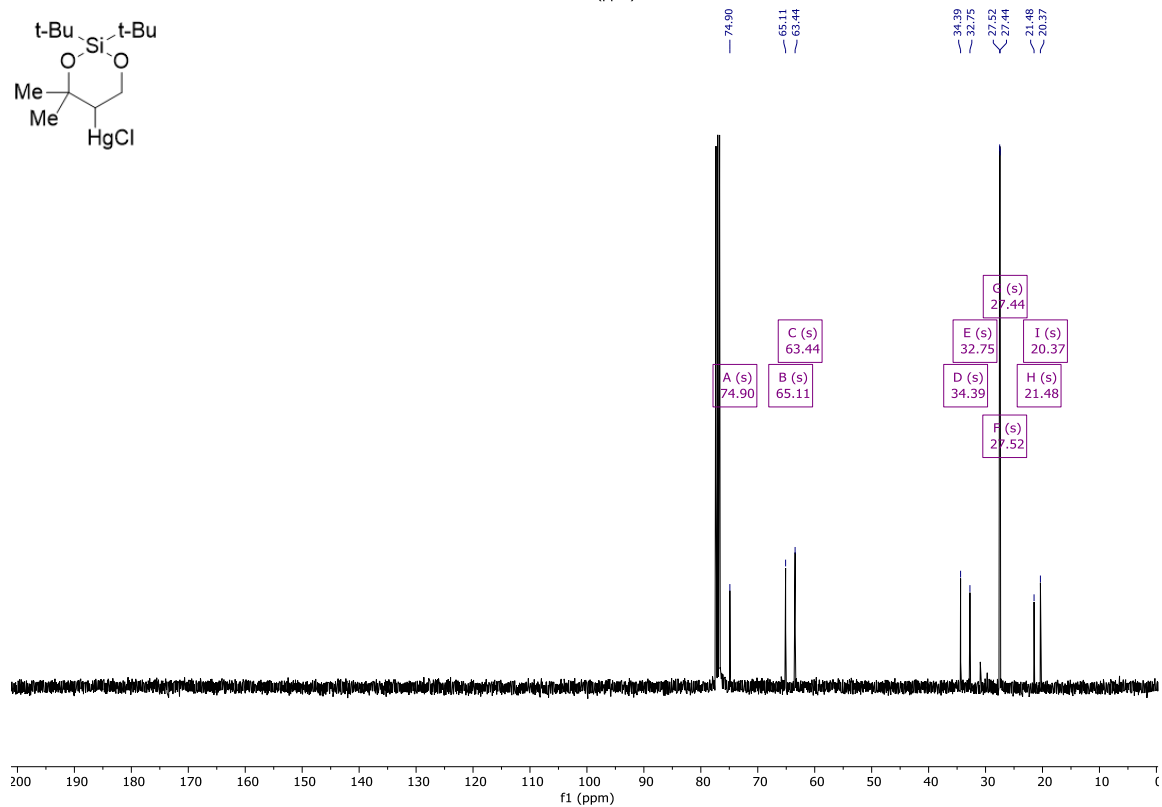

**Compound 46 (400 Mhz, 100 Mhz)**

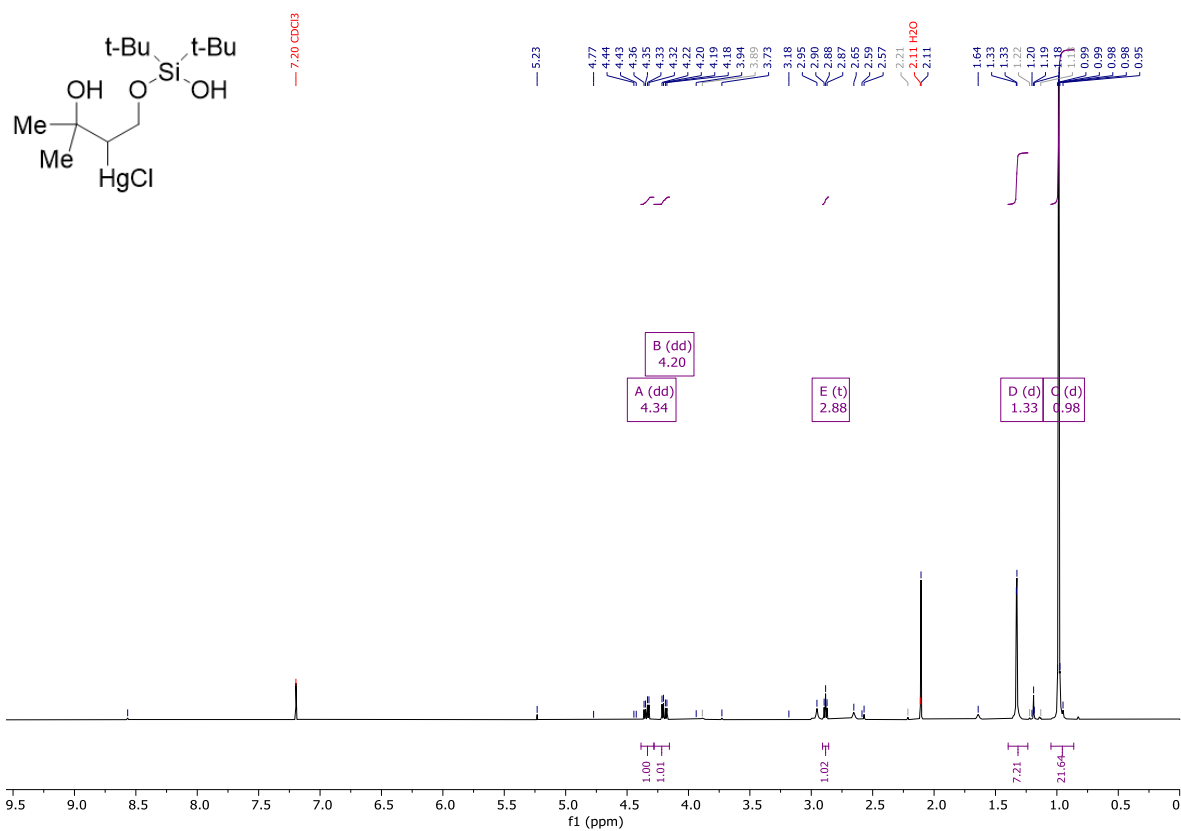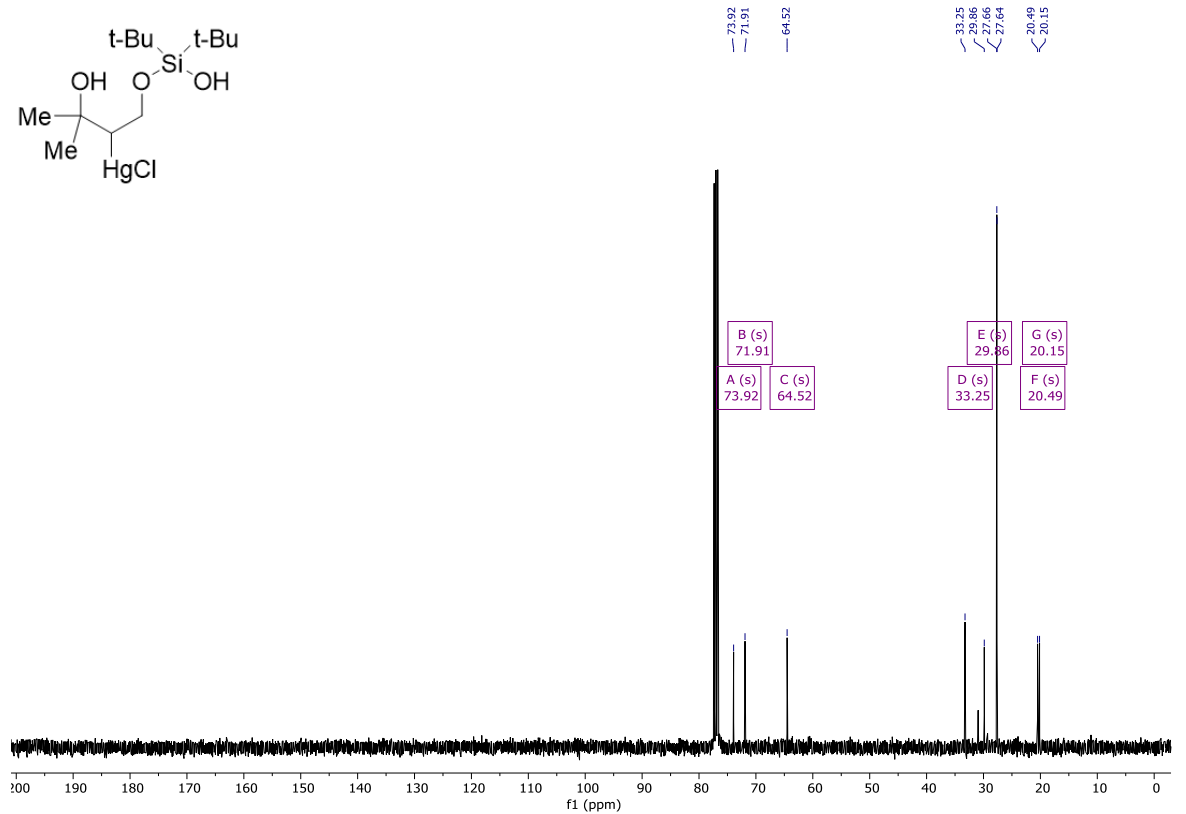



# Compound 47 (400 Mhz, 100 Mhz)

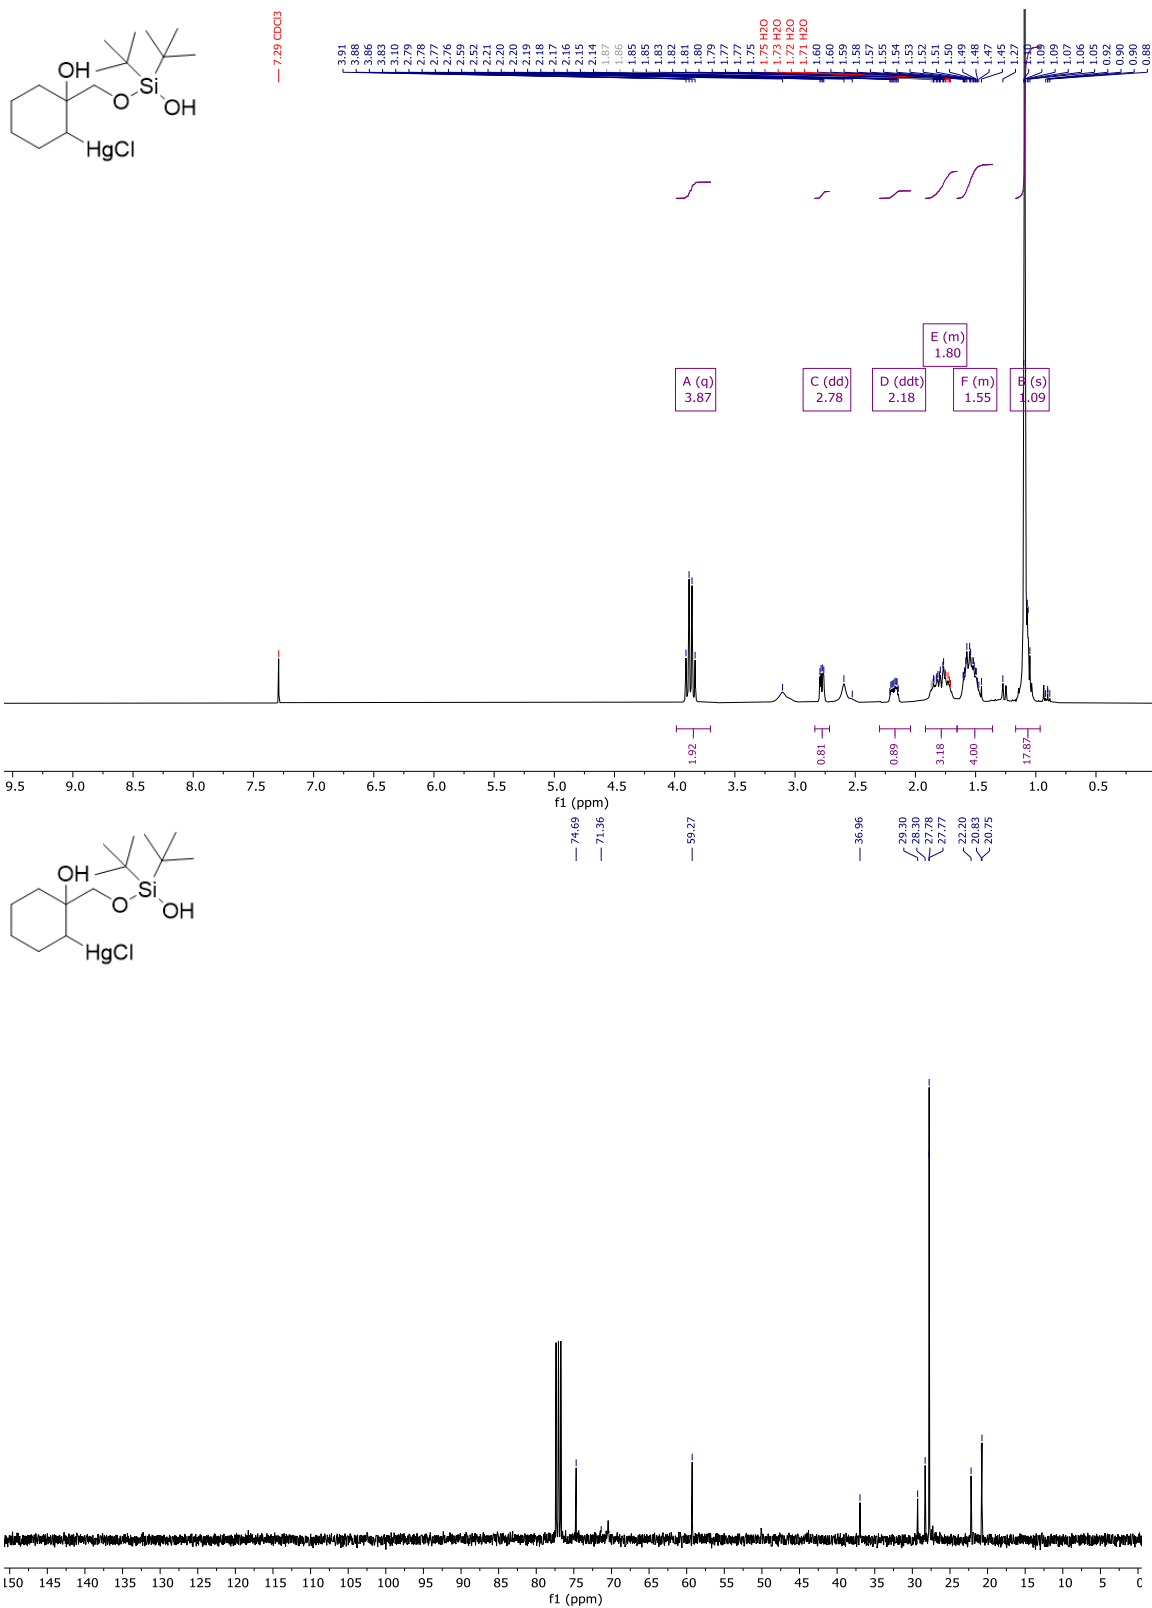

**Compound 48 (400 Mhz, 100 Mhz)**

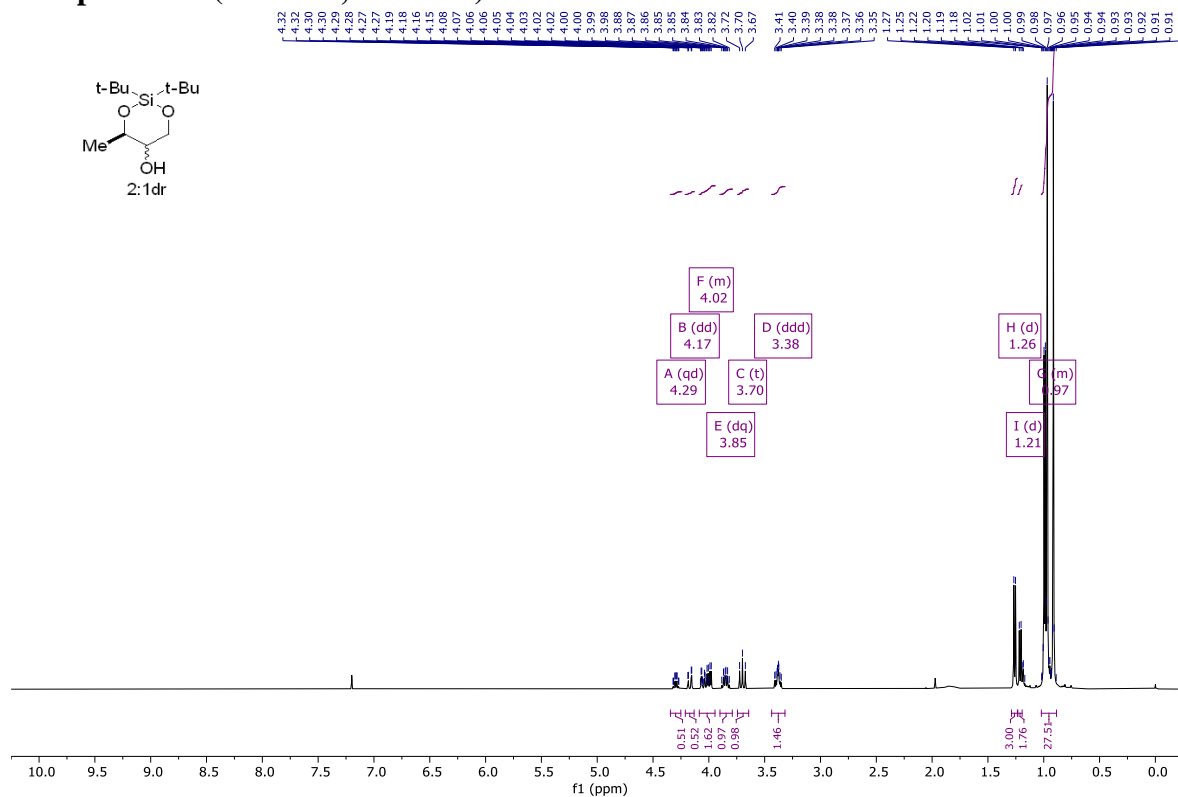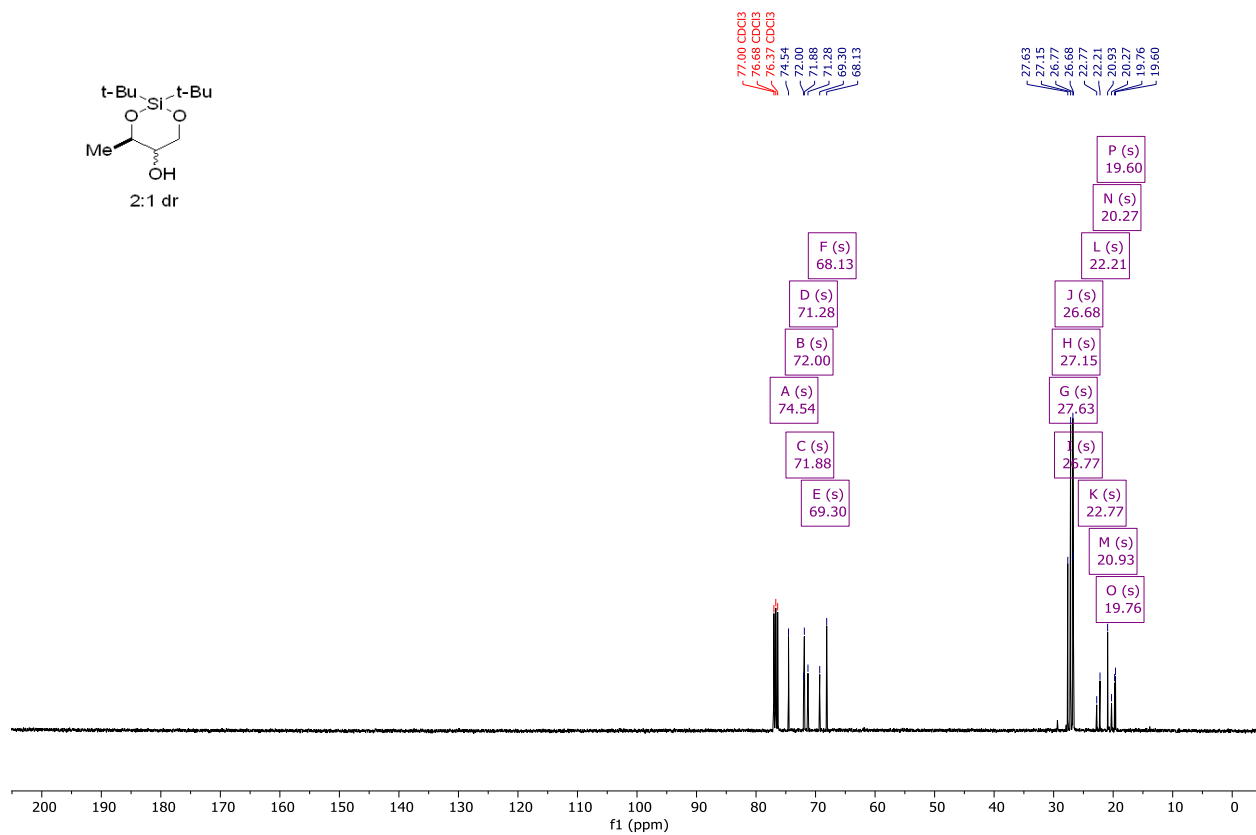

Compound 49 (400 Mhz, 100 Mhz)

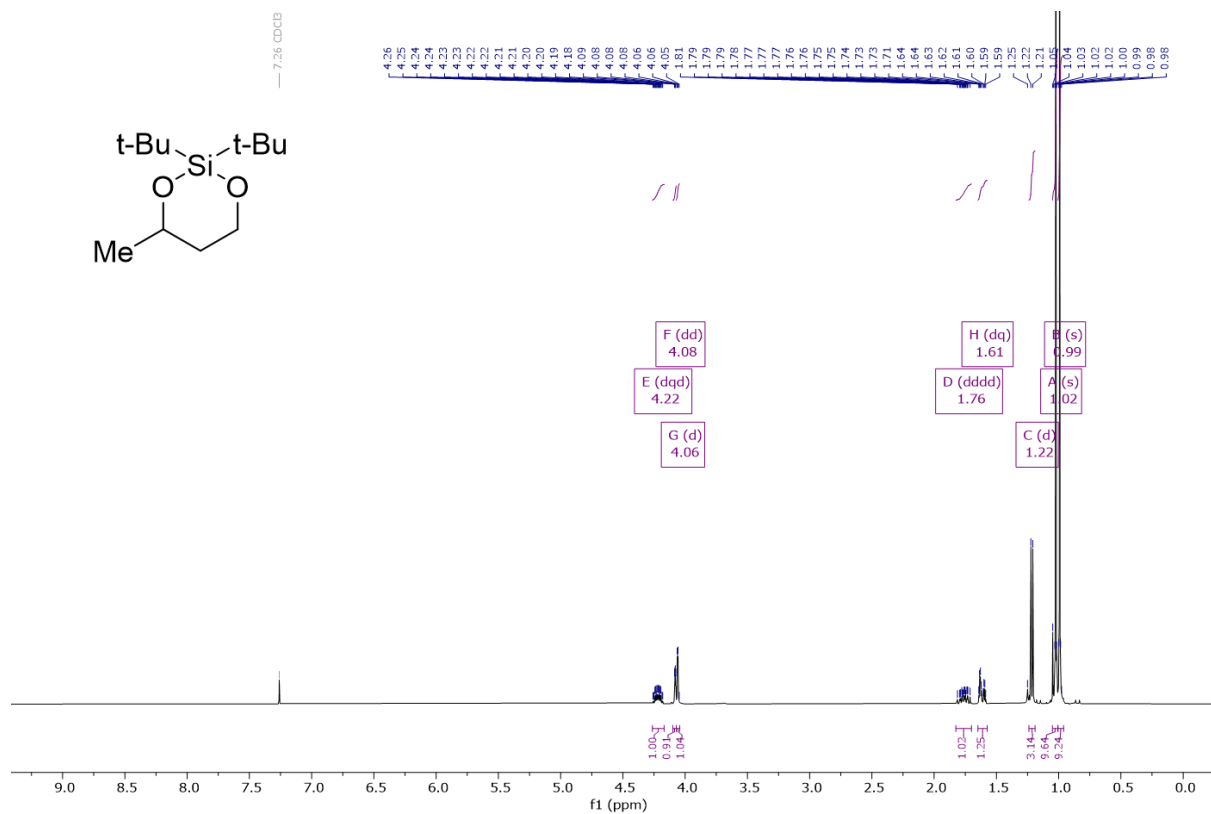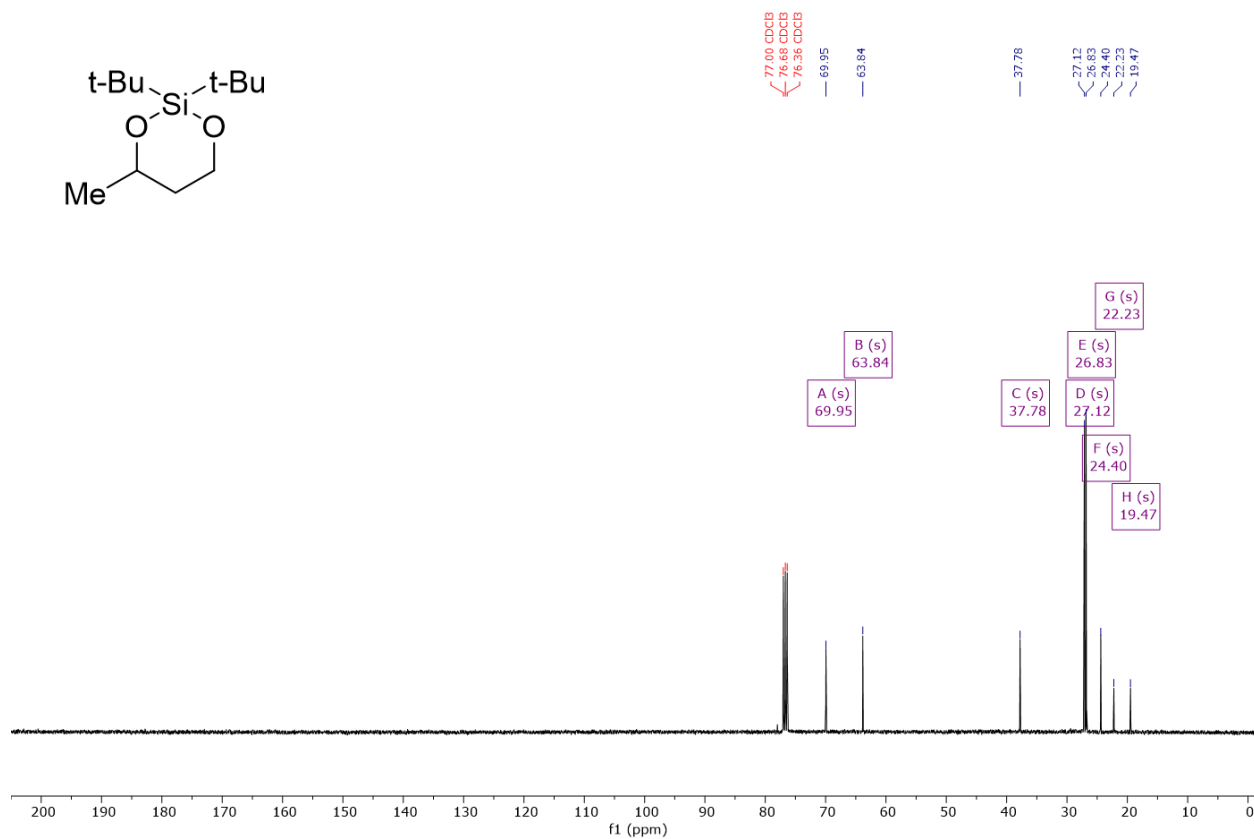

# Compound 50 major diastereomer (400 Mhz, 100 Mhz)

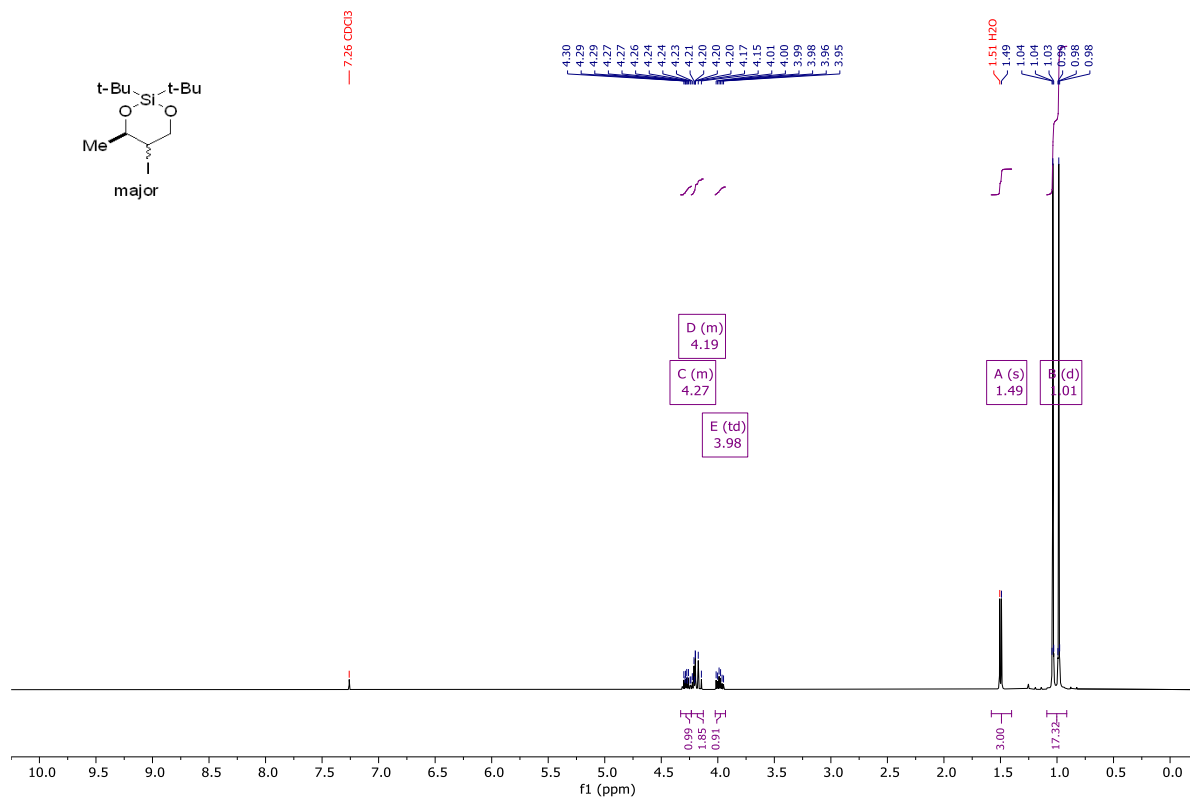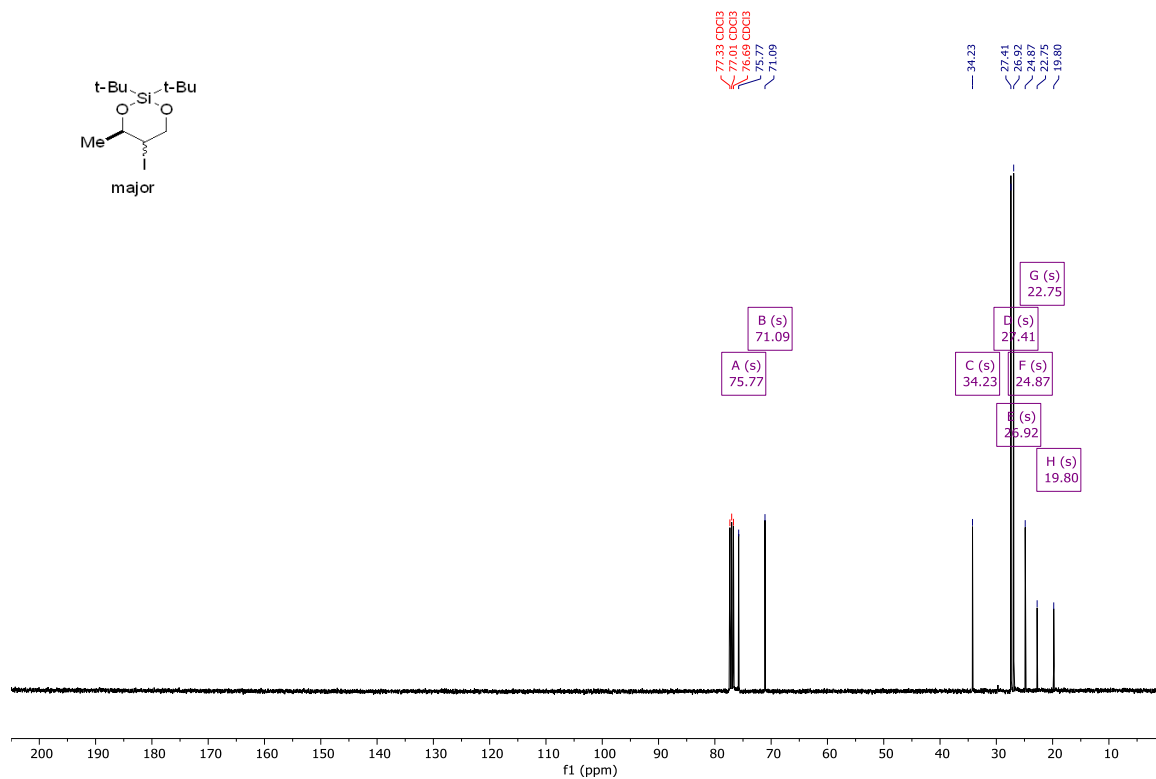

Compound 50, minor diastereomer (400 Mhz, 100 Mhz)

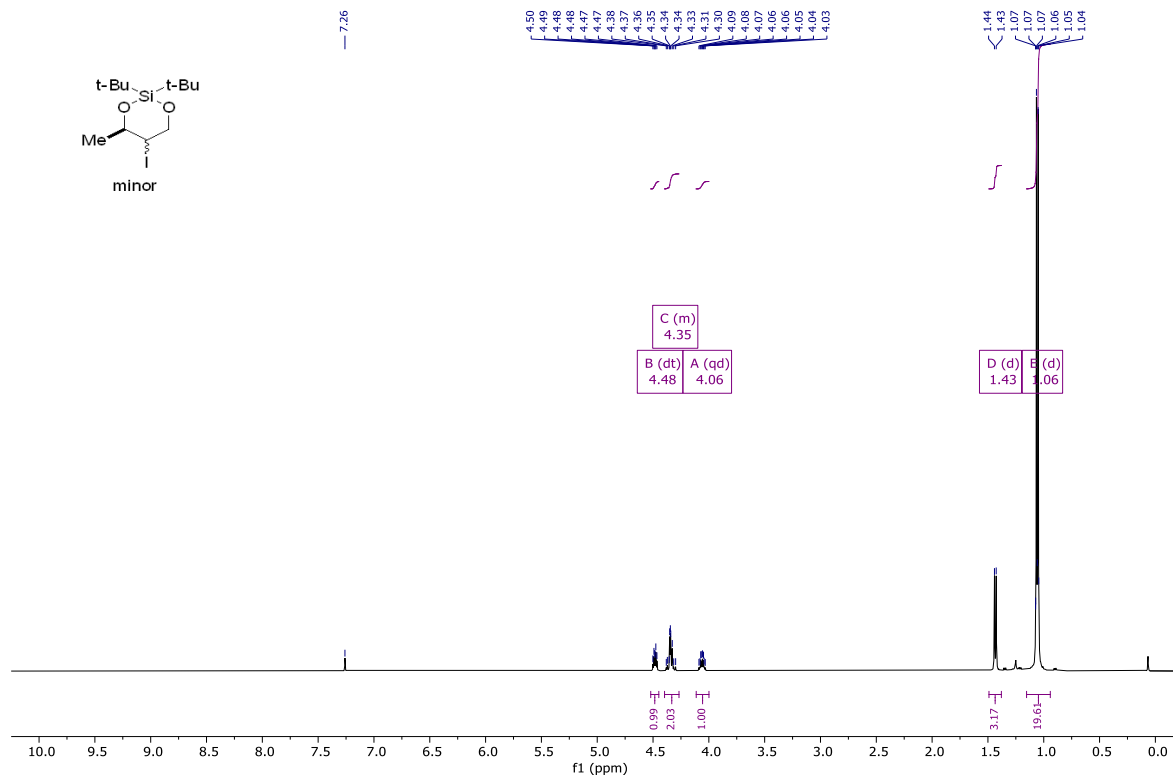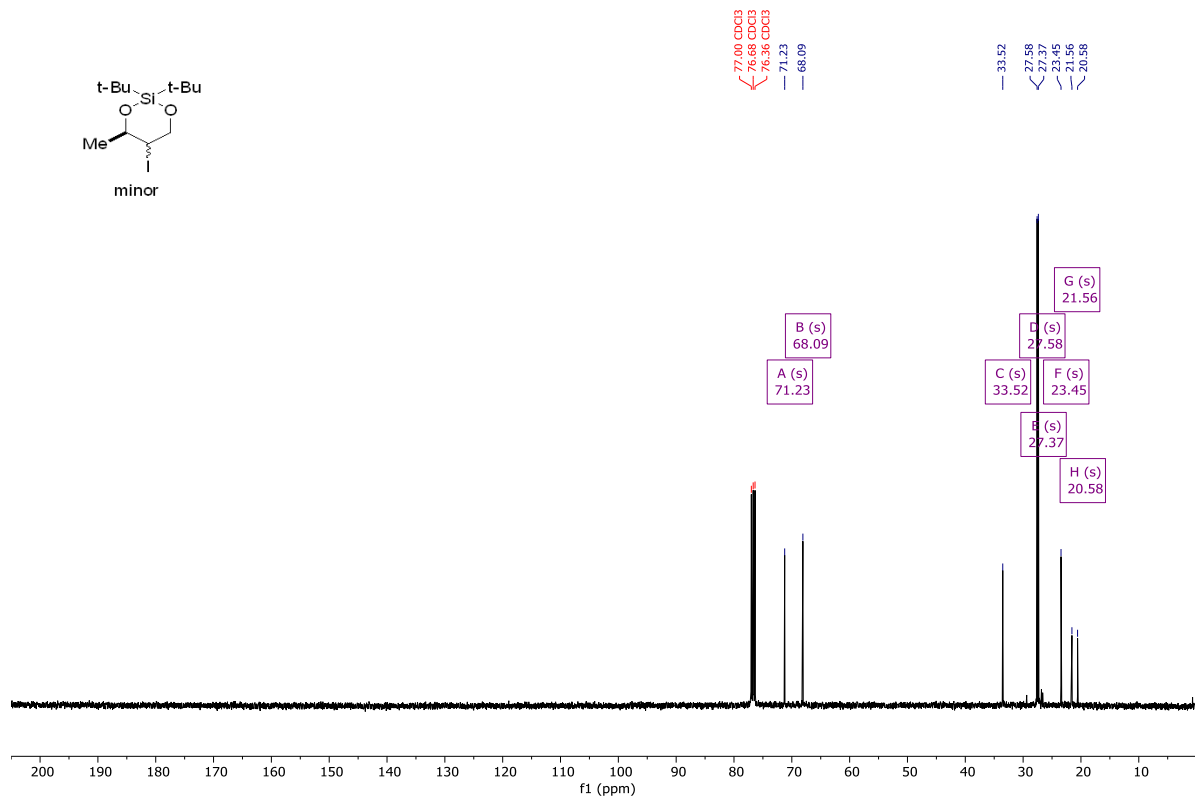

Supplement: NIHMS1891744-supplement-Supporting_Information.pdf [file NIHMS1891744-supplement-Supporting_Information.pdf]
